# Supplementary material for: Comparative risk of thrombosis with thrombocytopenia syndrome or thromboembolic events associated with different covid-19 vaccines: international network cohort study from five European countries and the US
Source: PubMed Central journal article supplement (PMC9597610; doi:10.1136/bmj-2022-071594), 2022-10-26

## Contents

|                                                                                                                                                                                                |    |
|------------------------------------------------------------------------------------------------------------------------------------------------------------------------------------------------|----|
| Tables .....                                                                                                                                                                                   | 2  |
| Supplementary Table 1. Negative control outcome concept list. ....                                                                                                                             | 2  |
| Supplementary Table 2. Baseline characteristics of eligible ChAdOx1 and BNT162b2 cohorts of vaccinated people identified EU based databases.....                                               | 3  |
| Supplementary Table 3. Baseline characteristics of eligible Ad26.COVID.19 and BNT162b2 cohorts of vaccinated people identified EU based databases. ....                                        | 5  |
| Supplementary Table 4. Baseline characteristics of eligible Ad26.COVID.19, BNT162b2, and mRNA-1273 cohorts of vaccinated people identified US Open Claims.....                                 | 8  |
| Supplementary Table 5. Baseline characteristics of eligible cohorts of vaccinated people identified in IQVIA LPD France.....                                                                   | 9  |
| Supplementary Table 6. Baseline characteristics of eligible cohorts of vaccinated people identified in IPCI .....                                                                              | 12 |
| Supplementary Table 7. Baseline characteristics of eligible cohorts of vaccinated people identified in IQVIA US Hospital CDM .....                                                             | 13 |
| Supplementary Table 8. Summary of diagnostics at the database-target-comparator level.....                                                                                                     | 15 |
| Supplementary Table 9. Crude incidence rate and corresponding 95% confidence intervals, European data .....                                                                                    | 16 |
| Supplementary Table 10. Crude incidence rate and corresponding 95% confidence intervals, US data .....                                                                                         | 19 |
| Supplementary Table 11. Incidence rates before- and after- propensity score matching. ....                                                                                                     | 22 |
| Supplementary Table 12. Age and sex stratified incidence rate ratio, CPRD UK. ....                                                                                                             | 24 |
| Supplementary Table 13. Age and sex stratified incidence rate ratio, US Open Claims.....                                                                                                       | 26 |
| Supplementary Table 14. Cohort selection and minimal detectable relative risk, database-target-outcome.....                                                                                    | 30 |
| Supplementary Table 15. List of covariates with top 10 highest absolute value of propensity score model coefficient. ....                                                                      | 34 |
| Figures .....                                                                                                                                                                                  | 37 |
| Figure 1. Passed systematic error diagnostic: <20% negative control outcomes associated with exposure in the uncalibrated analyses (CPRD Aurum, 1 <sup>st</sup> dose ChAdOx1 vs BNT162b2)..... | 37 |
| Figure 2. Systematic error in the comparison between Janssen and mRNA vaccines in US Open Claims.....                                                                                          | 38 |
| Figure 3. Systematic error in meta-analysis.....                                                                                                                                               | 39 |

## Tables

Supplementary Table 1. Negative control outcome concept list.

| Concept Id | Outcome Name                                              | Concept Id | Outcome Name                                        |
|------------|-----------------------------------------------------------|------------|-----------------------------------------------------|
| 438945     | Accidental poisoning by benzodiazepine-based tranquilizer | 138690     | Infestation by Pediculus                            |
| 434455     | Acquired claw toes                                        | 4152376    | Intentional self poisoning                          |
| 316211     | Acquired spondylolisthesis                                | 192953     | Intestinal adhesions with obstruction               |
| 201612     | Alcoholic liver damage                                    | 196347     | Intestinal parasitism                               |
| 438730     | Alkalosis                                                 | 137977     | Jaundice                                            |
| 441258     | Anemia in neoplastic disease                              | 317510     | Leukemia                                            |
| 432513     | Animal bite wound                                         | 765053     | Lump in right breast                                |
| 4171556    | Ankle ulcer                                               | 378165     | Nystagmus                                           |
| 4098292    | Antiphospholipid syndrome                                 | 434085     | Obstruction of duodenum                             |
| 77650      | Aseptic necrosis of bone                                  | 4147016    | Open wound of buttock                               |
| 4239873    | Benign neoplasm of ciliary body                           | 4129404    | Open wound of upper arm                             |
| 23731      | Benign neoplasm of larynx                                 | 438120     | Opioid dependence                                   |
| 199764     | Benign neoplasm of ovary                                  | 75924      | Osteodystrophy                                      |
| 195500     | Benign neoplasm of uterus                                 | 432594     | Osteomalacia                                        |
| 4145627    | Biliary calculus                                          | 30365      | Panhypopituitarism                                  |
| 4108471    | Burn of digit of hand                                     | 4108371    | Peripheral gangrene                                 |
| 75121      | Burn of lower leg                                         | 440367     | Plasmacytosis                                       |
| 4284982    | Calculus of bile duct without obstruction                 | 439233     | Poisoning by antidiabetic agent                     |
| 434327     | Cannabis abuse                                            | 442149     | Poisoning by bee sting                              |
| 78497      | Cellulitis and abscess of toe                             | 4314086    | Poisoning due to sting of ant                       |
| 4001454    | Cervical spine ankylosis                                  | 4147660    | Postural kyphosis                                   |
| 4068241    | Chronic instability of knee                               | 434319     | Premature ejaculation                               |
| 195596     | Chronic pancreatitis                                      | 199754     | Primary malignant neoplasm of pancreas              |
| 4206338    | Chronic salpingitis                                       | 4311499    | Primary malignant neoplasm of respiratory tract     |
| 4058397    | Claustrophobia                                            | 436635     | Primary malignant neoplasm of sigmoid colon         |
| 74816      | Contusion of toe                                          | 196044     | Primary malignant neoplasm of stomach               |
| 73302      | Curvature of spine                                        | 433716     | Primary malignant neoplasm of testis                |
| 4151134    | Cyst of pancreas                                          | 133424     | Primary malignant neoplasm of thyroid gland         |
| 77638      | Displacement of intervertebral disc without myelopathy    | 194997     | Prostatitis                                         |
| 195864     | Diverticulum of bladder                                   | 80286      | Prosthetic joint loosening                          |
| 201346     | Edema of penis                                            | 443274     | Psychostimulant dependence                          |
| 200461     | Endometriosis of uterus                                   | 314962     | Raynaud's disease                                   |
| 377877     | Esotropia                                                 | 37018294   | Residual osteitis                                   |
| 193530     | Follicular cyst of ovary                                  | 4288241    | Salmonella enterica subspecies arizonae infection   |
| 4094822    | Foreign body in respiratory tract                         | 45757269   | Sclerosing mesenteritis                             |
| 443421     | Gallbladder and bile duct calculi                         | 74722      | Secondary localized osteoarthritis of pelvic region |
| 135215     | Hashimoto thyroiditis                                     | 200348     | Secondary malignant neoplasm of large intestine     |
| 442190     | Hemorrhage of colon                                       | 43020446   | Sedative withdrawal                                 |
| 43020475   | High risk heterosexual behavior                           | 74194      | Sprain of spinal ligament                           |
| 194149     | Hirschsprung's disease                                    | 4194207    | Tailor's bunion                                     |
| 443204     | Human ehrlichiosis                                        | 193521     | Tropical sprue                                      |
| 4226238    | Hyperosmolar coma due to diabetes mellitus                | 40482801   | Type II diabetes mellitus uncontrolled              |

|         |                         |         |                                        |
|---------|-------------------------|---------|----------------------------------------|
| 4032787 | Hyperosmolarity         | 74719   | Ulcer of foot                          |
| 197032  | Hyperplasia of prostate | 196625  | Viral hepatitis A without hepatic coma |
| 140362  | Hypoparathyroidism      | 197494  | Viral hepatitis C                      |
| 435371  | Hypothermia             | 4284533 | Vitamin D-dependent rickets            |

Supplementary Table 2. Baseline characteristics of eligible ChAdOx1 and BNT162b2 cohorts of vaccinated people identified EU based databases.

|                                             | UK CPRD                      |                               |       |                              |                               |       | Germany DA                   |                               |       |                              |                               |       |
|---------------------------------------------|------------------------------|-------------------------------|-------|------------------------------|-------------------------------|-------|------------------------------|-------------------------------|-------|------------------------------|-------------------------------|-------|
|                                             | Before PS matching           |                               |       | After PS matching            |                               |       | Before PS matching           |                               |       | After PS matching            |                               |       |
|                                             | ChAdOx1 1 <sup>st</sup> dose | BNT162b2 1 <sup>st</sup> dose |       | ChAdOx1 1 <sup>st</sup> dose | BNT162b2 1 <sup>st</sup> dose |       | ChAdOx1 1 <sup>st</sup> dose | BNT162b2 1 <sup>st</sup> dose |       | ChAdOx1 1 <sup>st</sup> dose | BNT162b2 1 <sup>st</sup> dose |       |
| Characteristic                              | %                            | %                             | SMD   | %                            | %                             | SMD   | %                            | %                             | SMD   | %                            | %                             | SMD   |
| <b>Cohort Count</b>                         | 3,741,359                    | 1,804,763                     |       | 1,247,556                    | 1,912,752                     |       | 88,463                       | 344,916                       |       | 85,163                       | 211,587                       |       |
| <b>Age group</b>                            |                              |                               |       |                              |                               |       |                              |                               |       |                              |                               |       |
| <20                                         | 0.4                          | 0.6                           | -0.03 | 0.5                          | 0.6                           | -0.01 | 0.5                          | 2                             | -0.14 | 0.4                          | 0.4                           | 0.01  |
| 20 - 29                                     | 4.4                          | 5.4                           | -0.05 | 4.7                          | 4.7                           | 0.00  | 4.3                          | 7.4                           | -0.14 | 3.8                          | 3.5                           | 0.02  |
| 30 - 39                                     | 7.5                          | 7.9                           | -0.02 | 8.3                          | 6.9                           | 0.05  | 5.9                          | 9.9                           | -0.15 | 5.5                          | 5.2                           | 0.01  |
| 40 - 49                                     | 18.3                         | 10.9                          | 0.21  | 10.4                         | 11.1                          | -0.03 | 8.7                          | 12.8                          | -0.14 | 8.2                          | 7.8                           | 0.01  |
| 50 - 59                                     | 28.8                         | 16                            | 0.31  | 15.6                         | 16.9                          | -0.03 | 19.1                         | 22.4                          | -0.08 | 19                           | 18.7                          | 0.01  |
| 60 - 69                                     | 21.3                         | 17.8                          | 0.09  | 23.4                         | 22.2                          | 0.03  | 37.2                         | 22.5                          | 0.33  | 37.5                         | 37.3                          | 0.01  |
| 70 - 79                                     | 14.7                         | 20.4                          | -0.15 | 27.2                         | 25.8                          | 0.03  | 18                           | 16.1                          | 0.05  | 18.8                         | 19.9                          | -0.03 |
| 80 - 89                                     | 3.6                          | 17.7                          | -0.47 | 8.8                          | 9.5                           | -0.02 | 5.4                          | 5.9                           | -0.02 | 5.7                          | 6                             | -0.02 |
| 90 - 99                                     | 1.1                          | 3.3                           | -0.15 | 2.1                          | 2.1                           | 0.00  | 1.1                          | 1                             | 0.01  | 1.1                          | 1.2                           | -0.01 |
| 100 - 109                                   | 0.1                          | 0.1                           | -0.01 | 0.1                          | 0.1                           | 0.01  |                              |                               |       |                              |                               |       |
| <b>Gender: female</b>                       | 51.5                         | 58.2                          | -0.14 | 56.1                         | 56.1                          | 0.00  | 41.2                         | 55                            | -0.28 | 42                           | 42.3                          | 0.00  |
| <b>Index month</b>                          |                              |                               |       |                              |                               |       |                              |                               |       |                              |                               |       |
| 12                                          |                              | 11                            |       |                              |                               |       |                              |                               |       |                              |                               |       |
| 1                                           | 13.7                         | 47.6                          | -0.79 | 37.9                         | 41.6                          | -0.08 |                              |                               |       |                              |                               |       |
| 2                                           | 29                           | 36.3                          | -0.16 | 54.8                         | 50.2                          | 0.09  |                              |                               |       |                              |                               |       |
| 3                                           | 45.7                         | 3.6                           | 1.12  | 4.4                          | 5.2                           | -0.04 | 1.9                          | 0.1                           | 0.18  | 0.5                          | 0.4                           | 0.02  |
| 4                                           | 9                            | 1.6                           | 0.34  | 2.3                          | 2.3                           | -0.01 | 22.2                         | 30.7                          | -0.20 | 24.6                         | 25.1                          | -0.01 |
| 5                                           | 2.5                          | 0.4                           | 0.17  | 0.6                          | 0.6                           | -0.01 | 60.4                         | 26.4                          | 0.73  | 61.1                         | 61.3                          | 0.00  |
| 6                                           |                              |                               |       |                              |                               |       | 13.2                         | 24.5                          | -0.29 | 12.1                         | 11.9                          | 0.01  |
| 7                                           |                              |                               |       |                              |                               |       | 2                            | 12.7                          | -0.42 | 1.6                          | 1.4                           | 0.02  |
| 8                                           |                              |                               |       |                              |                               |       | 0.3                          | 5.5                           | -0.32 | 0.1                          | 0.1                           | 0.00  |
| <b>Covid-19 infection prior vaccination</b> | 5.5                          | 4                             | 0.07  | 4.6                          | 4.4                           | 0.01  |                              |                               |       |                              |                               |       |
| <b>Charlson index – Romano adaptation</b>   | 79.8                         | 131.1                         | -0.33 | 123.6                        | 121.7                         | 0.01  | 158.8                        | 157.2                         | 0.01  | 164.1                        | 169.1                         | -0.02 |
| <b>CHADS2VAsc</b>                           | 128.3                        | 200.6                         | -0.54 | 190.4                        | 187.3                         | 0.02  | 196.9                        | 194                           | 0.02  | 204                          | 209.1                         | -0.03 |



|                                               |      |      |       |      |      |      |      |      |       |      |      |       |
|-----------------------------------------------|------|------|-------|------|------|------|------|------|-------|------|------|-------|
| Malignant tumor of breast                     | 1.6  | 2.7  | -0.07 | 2.7  | 2.7  | 0.00 | 1.7  | 2.3  | -0.04 | 1.8  | 1.9  | 0.00  |
| Hematologic neoplasm                          | 0.4  | 0.7  | -0.04 | 0.6  | 0.6  | 0.00 | 0.9  | 1.2  | -0.03 | 1    | 1    | -0.01 |
| Malignant lymphoma                            | 0.3  | 0.6  | -0.04 | 0.6  | 0.6  | 0.00 | 0.7  | 0.9  | -0.02 | 0.7  | 0.7  | -0.01 |
| Malignant neoplasm of anorectum               | 0.2  | 0.4  | -0.04 | 0.4  | 0.4  | 0.00 | 0.4  | 0.4  | 0.00  | 0.4  | 0.5  | -0.01 |
| Malignant neoplastic disease                  | 8.2  | 14.7 | -0.21 | 13.4 | 13.4 | 0.00 | 12.1 | 12.8 | -0.02 | 12.6 | 13   | -0.01 |
| Malignant tumor of colon                      | 0.3  | 0.7  | -0.05 | 0.6  | 0.6  | 0.00 | 0.8  | 0.8  | 0.00  | 0.8  | 0.9  | -0.01 |
| Malignant tumor of lung                       | 0.2  | 0.3  | -0.03 | 0.3  | 0.3  | 0.00 | 0.2  | 0.3  | -0.02 | 0.2  | 0.3  | 0.00  |
| <b>Medication use</b>                         |      |      |       |      |      |      |      |      |       |      |      |       |
| Lipid modifying agents                        | 9.4  | 15.7 | -0.19 | 15.6 | 15.3 | 0.01 | 19.5 | 17.1 | 0.06  | 20.8 | 21.5 | -0.02 |
| Antithrombotic agents                         | 4.4  | 8.9  | -0.18 | 7.8  | 7.7  | 0.00 | 14.1 | 14.2 | 0.00  | 14.9 | 15.5 | -0.02 |
| Agents acting on the renin-angiotensin system | 9.1  | 14   | -0.16 | 13.7 | 13.6 | 0.00 | 35.9 | 30.6 | 0.11  | 38.3 | 39.1 | -0.02 |
| Beta blocking agents                          | 4.5  | 7.7  | -0.13 | 7.1  | 7.1  | 0.00 | 23.1 | 20.8 | 0.06  | 24.7 | 25.4 | -0.02 |
| Diuretics                                     | 3.4  | 6.2  | -0.13 | 5.6  | 5.6  | 0.00 | 19.8 | 17.2 | 0.07  | 21.1 | 21.6 | -0.01 |
| Drugs for acid related disorders              | 11.1 | 15.3 | -0.13 | 15   | 14.9 | 0.00 | 17.4 | 18.1 | -0.02 | 18.6 | 19   | -0.01 |
| Calcium channel blockers                      | 6.5  | 9.9  | -0.12 | 9.8  | 9.7  | 0.00 | 16   | 13.7 | 0.07  | 17   | 17.3 | -0.01 |
| Antiinflammatory and antirheumatic products   | 6.5  | 9.5  | -0.11 | 9.3  | 9.1  | 0.01 | 20.7 | 19   | 0.04  | 21.7 | 22   | -0.01 |
| Drugs used in diabetes                        | 4.3  | 6.8  | -0.11 | 7.1  | 7    | 0.01 | 11.4 | 10.4 | 0.03  | 12.1 | 12.5 | -0.01 |
| Drugs for obstructive airway diseases         | 9.5  | 11.9 | -0.08 | 12.1 | 12   | 0.01 | 9.3  | 10.2 | -0.03 | 9.9  | 10   | -0.01 |
| Antibacterials for systemic use               | 8.6  | 10.6 | -0.07 | 10.5 | 10.3 | 0.01 | 6.4  | 7.9  | -0.06 | 6.6  | 6.8  | -0.01 |
| Opioids                                       | 5.7  | 7.3  | -0.06 | 7.3  | 7.2  | 0.00 | 4.9  | 4.8  | 0.01  | 5.1  | 5.2  | -0.01 |
| Antineoplastic agents                         | 0.4  | 0.6  | -0.03 | 0.6  | 0.6  | 0.00 | 0.9  | 1    | -0.01 | 0.9  | 1    | 0.00  |
| Immunosuppressants                            | 0.4  | 0.6  | -0.03 | 0.6  | 0.6  | 0.00 | 0.7  | 1    | -0.03 | 0.8  | 0.8  | 0.00  |
| Antiepileptics                                | 2.5  | 2.9  | -0.03 | 3    | 3    | 0.00 | 2.4  | 2.7  | -0.02 | 2.6  | 2.7  | -0.01 |
| Psycholeptics                                 | 2.7  | 3.1  | -0.02 | 3.2  | 3.2  | 0.00 | 4.3  | 4.6  | -0.02 | 4.6  | 4.7  | -0.01 |
| Antipsoriatics                                | 0.3  | 0.3  | 0.00  | 0.3  | 0.4  | 0.00 | 0.3  | 0.2  | 0.00  | 0.3  | 0.3  | 0.00  |

- Characteristics are based on deep vein thrombosis as the outcome event. Numbers are slightly different for other outcome events, as patients with prior history of that event were excluded from the analysis.

Supplementary Table 3. Baseline characteristics of eligible Ad26.COVS.S and BNT162b2 cohorts of vaccinated people identified EU based databases.

| Characteristic | Germany DA         |          |     |                   |          |     | Spain SIDIAP       |          |     |                   |          |     |
|----------------|--------------------|----------|-----|-------------------|----------|-----|--------------------|----------|-----|-------------------|----------|-----|
|                | Before PS matching |          |     | After PS matching |          |     | Before PS matching |          |     | After PS matching |          |     |
|                | Ad26.COVS.S        | BNT162b2 | SMD | Ad26.COVS.S       | BNT162b2 | SMD | Ad26.COVS.S        | BNT162b2 | SMD | Ad26.COVS.S       | BNT162b2 | SMD |
|                | %                  | %        |     | %                 | %        |     | %                  | %        |     | %                 | %        |     |

|                                             |        |         |       |        |        |       |         |           |       |         |         |       |
|---------------------------------------------|--------|---------|-------|--------|--------|-------|---------|-----------|-------|---------|---------|-------|
| <b>Cohort Count</b>                         | 18,485 | 344,916 |       | 18,428 | 67,016 |       | 126,189 | 1,973,028 |       | 116,087 | 421,532 |       |
| <b>Age group</b>                            |        |         |       |        |        |       |         |           |       |         |         |       |
| <20                                         |        |         |       |        |        |       | 0.3     | 0.2       | 0.02  | 0.3     | 0.2     | 0.01  |
| 20 - 29                                     | 10.3   | 7.4     | 0.10  | 5      | 4.9    | 0.01  | 3       | 1.9       | 0.07  | 3       | 2.5     | 0.03  |
| 30 - 39                                     | 13.1   | 9.9     | 0.10  | 8.1    | 8      | 0.00  | 4.8     | 8.3       | -0.14 | 4.8     | 5       | -0.01 |
| 40 - 49                                     | 16.9   | 12.8    | 0.11  | 13.8   | 13.8   | 0.00  | 40.8    | 25.6      | 0.33  | 42.4    | 44.7    | -0.05 |
| 50 - 59                                     | 28.1   | 22.4    | 0.13  | 29.3   | 29.5   | -0.01 | 13.7    | 24.9      | -0.29 | 14.9    | 14.2    | 0.02  |
| 60 - 69                                     | 21     | 22.5    | -0.04 | 28.3   | 28.5   | -0.01 | 18.8    | 2.7       | 0.54  | 12.5    | 10.4    | 0.07  |
| 70 - 79                                     | 6.1    | 16.1    | -0.32 | 9.6    | 9.5    | 0.00  | 18.4    | 19.9      | -0.04 | 21.7    | 22.7    | -0.03 |
| 80 - 89                                     | 2.6    | 5.9     | -0.16 | 4.5    | 4.5    | 0.00  | 0.2     | 12.8      | -0.53 | 0.3     | 0.2     | 0.02  |
| 90 - 99                                     | 0.5    | 1       | -0.05 | 0.9    | 0.8    | 0.01  | 0.1     | 3.7       | -0.27 | 0.1     | 0.1     | 0.01  |
| <b>Gender: female</b>                       | 38.2   | 55      | -0.34 | 41.6   | 41.2   | 0.01  | 46.1    | 54.1      | -0.16 | 46.3    | 46.8    | -0.01 |
| <b>Index month</b>                          |        |         |       |        |        |       |         |           |       |         |         |       |
| 1                                           |        |         |       |        |        |       | 0.1     | 6.6       | -0.37 | 0.1     | 0.1     | -0.01 |
| 2                                           |        |         |       |        |        |       | 0.1     | 5.9       | -0.35 | 0.1     | 0.1     | -0.01 |
| 3                                           |        | 0.1     |       |        |        |       | 0.1     | 8.5       |       | 0.1     | 0.2     |       |
| 4                                           |        | 30.7    |       |        |        |       | 9.4     | 18.8      | -0.27 | 11.1    | 10.8    | 0.01  |
| 5                                           | 20.2   | 26.4    | -0.15 | 24.1   | 23.7   | 0.01  | 16.6    | 22.4      | -0.15 | 19.3    | 19.6    | -0.01 |
| 6                                           | 63.1   | 24.5    | 0.84  | 65.8   | 66.4   | -0.01 | 73.7    | 37.7      | 0.78  | 69.3    | 69.2    | 0.00  |
| 7                                           | 11     | 12.7    | -0.05 | 7.7    | 7.4    | 0.01  |         |           |       |         |         |       |
| 8                                           | 5.7    | 5.5     | 0.01  | 2.3    | 2.4    | -0.01 |         |           |       |         |         |       |
| <b>Covid-19 infection prior vaccination</b> | 1.7    | 2.1     | -0.03 | 1.9    | 2      | -0.01 | 8.2     | 6.6       | 0.06  | 7.4     | 7.7     | -0.01 |
| <b>Charlson index - Romano adaptation</b>   | 109.1  | 157.2   | -0.24 | 157.3  | 158.5  | -0.01 | 68.6    | 106.2     | -0.22 | 69.7    | 70.5    | -0.01 |
| <b>CHADS2VAsc</b>                           | 132.1  | 194     | -0.42 | 185.7  | 186.6  | -0.01 | 123.4   | 185.5     | -0.41 | 126.7   | 122.7   | 0.03  |
| <b>Medical history: General</b>             |        |         |       |        |        |       |         |           |       |         |         |       |
| Acute respiratory disease                   | 62.8   | 59.6    | 0.07  | 64.6   | 64.9   | -0.01 | 53.8    | 56.2      | -0.05 | 54.5    | 54.9    | -0.01 |
| Attention deficit hyperactivity disorder    | 0.6    | 0.4     | 0.02  | 0.7    | 0.7    | 0.00  | 0.3     | 0.2       | 0.02  | 0.3     | 0.3     | 0.00  |
| Chronic liver disease                       | 0.9    | 1       | -0.01 | 1.3    | 1.3    | 0.00  | 1.8     | 1.4       | 0.03  | 1.7     | 1.8     | 0.00  |
| Chronic obstructive lung disease            | 9.3    | 11.3    | -0.07 | 12.8   | 13     | -0.01 | 4.1     | 5.4       | -0.06 | 4.1     | 3.9     | 0.01  |
| Crohn's disease                             | 0.6    | 0.8     | -0.03 | 0.7    | 0.7    | 0.01  | 0.2     | 0.2       | -0.01 | 0.2     | 0.2     | -0.01 |
| Dementia                                    | 1.4    | 2.2     | -0.06 | 2.4    | 2.3    | 0.00  | 0.3     | 2.7       | -0.19 | 0.4     | 0.4     | 0.00  |
| Depressive disorder                         | 22     | 24.2    | -0.05 | 28.1   | 28.4   | -0.01 | 13.7    | 15.2      | -0.04 | 13.7    | 14      | -0.01 |
| Diabetes mellitus                           | 15.8   | 20.1    | -0.11 | 24.6   | 24.7   | 0.00  | 11.7    | 14.1      | -0.07 | 11.6    | 11.5    | 0.00  |
| Gastroesophageal reflux disease             | 4.5    | 5.8     | -0.06 | 6.3    | 6.3    | 0.00  | 7       | 7.9       | -0.04 | 7       | 6.9     | 0.00  |
| Human immunodeficiency virus infection      | 0.2    | 0.3     | -0.02 | 0.2    | 0.2    | -0.01 | 0.6     | 0.3       | 0.05  | 0.6     | 0.6     | 0.00  |
| Hypertensive disorder                       | 36.2   | 43.8    | -0.15 | 55.6   | 55.7   | 0.00  | 25.5    | 34.7      | -0.20 | 25.6    | 25      | 0.01  |
| Lesion of liver                             | 1.1    | 1.4     | -0.02 | 1.7    | 1.7    | 0.00  | 1.1     | 1         | 0.01  | 1.1     | 1.1     | -0.01 |
| Obesity                                     | 14.2   | 15.3    | -0.03 | 19.3   | 19.4   | 0.00  | 24      | 25.5      | -0.04 | 24      | 23.9    | 0.00  |
| Osteoarthritis                              | 26.1   | 29      | -0.07 | 34.2   | 34.3   | 0.00  | 16.8    | 24.5      | -0.19 | 17      | 16.3    | 0.02  |
| Pneumonia                                   | 5.5    | 6.9     | -0.06 | 7      | 6.8    | 0.01  | 6.6     | 8.1       | -0.06 | 6.6     | 6.7     | -0.01 |

|                                               |      |      |       |      |      |       |      |      |       |      |      |       |
|-----------------------------------------------|------|------|-------|------|------|-------|------|------|-------|------|------|-------|
| Psoriasis                                     | 3.4  | 3.7  | -0.02 | 4.4  | 4.4  | 0.00  | 2.8  | 3    | -0.01 | 2.8  | 2.9  | 0.00  |
| Renal impairment                              | 4.6  | 7.3  | -0.11 | 7.3  | 7.3  | 0.00  | 3.8  | 9.6  | -0.24 | 3.9  | 3.8  | 0.00  |
| Rheumatoid arthritis                          | 2.6  | 4    | -0.08 | 3.7  | 3.7  | 0.00  | 0.5  | 0.8  | -0.04 | 0.5  | 0.6  | -0.01 |
| Schizophrenia                                 | 0.5  | 0.4  | 0.01  | 0.7  | 0.6  | 0.00  | 1.2  | 0.5  | 0.07  | 1.2  | 1.3  | -0.01 |
| Ulcerative colitis                            | 0.7  | 1    | -0.03 | 0.9  | 0.8  | 0.01  | 0.4  | 0.4  | -0.01 | 0.4  | 0.4  | -0.01 |
| Urinary tract infectious disease              | 12.8 | 17.3 | -0.13 | 15.9 | 15.7 | 0.01  | 19.3 | 24   | -0.12 | 19.4 | 19.8 | -0.01 |
| Viral hepatitis C                             | 0.6  | 0.4  | 0.03  | 0.8  | 0.7  | 0.01  | 1.3  | 0.9  | 0.04  | 1.3  | 1.3  | 0.00  |
| <b>Medical history:</b>                       |      |      |       |      |      |       |      |      |       |      |      |       |
| <b>Cardiovascular disease</b>                 |      |      |       |      |      |       |      |      |       |      |      |       |
| Atrial fibrillation                           | 1.7  | 3.3  | -0.10 | 2.8  | 2.7  | 0.00  | 2.1  | 5.5  | -0.18 | 2.2  | 2.2  | 0.00  |
| Cerebrovascular disease                       | 3.9  | 7.3  | -0.15 | 6.5  | 6.6  | 0.00  | 1.8  | 3.6  | -0.12 | 1.8  | 2    | -0.01 |
| Heart disease                                 | 21.3 | 29.4 | -0.19 | 31.6 | 31.7 | 0.00  | 12.2 | 20.1 | -0.22 | 12.4 | 12.4 | 0.00  |
| Heart failure                                 | 3.9  | 6.8  | -0.13 | 6.7  | 6.8  | 0.00  | 1.5  | 4.2  | -0.16 | 1.6  | 1.6  | -0.01 |
| Peripheral vascular disease                   | 4.1  | 5.8  | -0.08 | 6.9  | 7    | 0.00  | 1.7  | 2.5  | -0.06 | 1.7  | 1.7  | -0.01 |
| Pulmonary embolism                            | 0.6  | 1.5  | -0.09 | 0.8  | 0.8  | 0.00  | 0.4  | 0.7  | -0.04 | 0.4  | 0.4  | 0.00  |
| Venous thrombosis                             | 4.2  | 5.7  | -0.07 | 4.3  | 4.3  | 0.00  | 2.9  | 3.8  | -0.05 | 2.9  | 2.8  | 0.00  |
| <b>Medical history: Neoplasms</b>             |      |      |       |      |      |       |      |      |       |      |      |       |
| Malignant tumor of breast                     | 0.9  | 2.3  | -0.12 | 1.2  | 1.1  | 0.01  | 1.2  | 1.8  | -0.05 | 1.3  | 1.3  | 0.00  |
| Hematologic neoplasm                          | 0.8  | 1.2  | -0.04 | 1.1  | 1.1  | 0.00  | 0.6  | 1    | -0.04 | 0.6  | 0.7  | -0.01 |
| Malignant lymphoma                            | 0.4  | 0.9  | -0.06 | 0.6  | 0.6  | 0.00  | 0.2  | 0.4  | -0.04 | 0.2  | 0.2  | 0.00  |
| Malignant neoplasm of anorectum               | 0.2  | 0.4  | -0.04 | 0.3  | 0.3  | 0.00  | 0.2  | 0.4  | -0.03 | 0.3  | 0.3  | 0.00  |
| Malignant neoplastic disease                  | 7.1  | 12.8 | -0.19 | 10   | 10   | 0.00  | 7.1  | 11.9 | -0.16 | 7.5  | 7.4  | 0.00  |
| Malignant tumor of lung                       | 0.1  | 0.3  | -0.05 | 0.2  | 0.2  | -0.01 | 0.2  | 0.2  | -0.02 | 0.2  | 0.2  | 0.00  |
| Malignant tumor of urinary bladder            | 0.2  | 0.4  | -0.04 | 0.3  | 0.3  | 0.00  | 0.5  | 0.9  | -0.05 | 0.6  | 0.6  | 0.00  |
| <b>Medication use</b>                         |      |      |       |      |      |       |      |      |       |      |      |       |
| Lipid modifying agents                        | 10.9 | 17.1 | -0.18 | 20.3 | 20.4 | 0.00  | 15.3 | 19.6 | -0.11 | 15.5 | 15.4 | 0.00  |
| Antithrombotic agents                         | 8.1  | 14.2 | -0.20 | 14.7 | 14.9 | -0.01 | 9.6  | 16.3 | -0.20 | 9.7  | 9.7  | 0.00  |
| Agents acting on the renin-angiotensin system | 23   | 30.6 | -0.17 | 42.4 | 42.6 | 0.00  | 18.9 | 25.7 | -0.17 | 19   | 18.6 | 0.01  |
| Diuretics                                     | 11.5 | 17.2 | -0.16 | 21.4 | 21.5 | 0.00  | 12   | 18.9 | -0.19 | 12.2 | 12   | 0.01  |
| Calcium channel blockers                      | 10.1 | 13.7 | -0.11 | 18.9 | 19   | 0.00  | 6    | 9.2  | -0.12 | 6.1  | 5.9  | 0.01  |
| Antiinflammatory and antirheumatic products   | 17.6 | 19   | -0.03 | 26.8 | 27.1 | -0.01 | 23.9 | 24.1 | 0.00  | 23.9 | 24.1 | 0.00  |
| Drugs used in diabetes                        | 7.5  | 10.4 | -0.10 | 13.8 | 13.8 | 0.00  | 9    | 10.7 | -0.06 | 8.9  | 8.9  | 0.00  |
| Drugs for obstructive airway diseases         | 7.3  | 10.2 | -0.10 | 11.4 | 11.5 | 0.00  | 12.6 | 14   | -0.04 | 12.7 | 12.7 | 0.00  |
| Antibacterials for systemic use               | 6.3  | 7.9  | -0.06 | 8.6  | 8.8  | -0.01 | 13.6 | 14.6 | -0.03 | 13.5 | 13.7 | 0.00  |
| Antineoplastic agents                         | 0.5  | 1    | -0.05 | 0.9  | 0.9  | 0.00  | 0.7  | 1    | -0.04 | 0.7  | 0.8  | -0.01 |
| Immunosuppressants                            | 0.4  | 1    | -0.08 | 0.6  | 0.6  | 0.00  | 0.6  | 1    | -0.04 | 0.7  | 0.9  | -0.02 |
| Antiepileptics                                | 1.8  | 2.7  | -0.06 | 3.2  | 3.3  | -0.01 | 7.2  | 7.1  | 0.01  | 7.2  | 7.5  | -0.01 |
| Psycholeptics                                 | 3.3  | 4.6  | -0.07 | 5.8  | 5.9  | 0.00  | 19.8 | 23.1 | -0.08 | 19.9 | 20.2 | -0.01 |
| Antipsoriatics                                | 0.2  | 0.2  | -0.01 | 0.3  | 0.3  | -0.01 | 0.9  | 1    | -0.02 | 0.9  | 0.9  | 0.00  |
| Antidepressants                               | 5.1  | 6.5  | -0.06 | 8.8  | 9    | -0.01 | 13.5 | 15.8 | -0.07 | 13.6 | 14   | -0.01 |

|                                                       |     |     |       |     |     |       |     |     |       |     |     |      |
|-------------------------------------------------------|-----|-----|-------|-----|-----|-------|-----|-----|-------|-----|-----|------|
| Psychostimulants, agents used for adhd and nootropics | 0.1 | 0.1 | -0.01 | 0.1 | 0.2 | -0.01 | 1.1 | 1.4 | -0.03 | 1.1 | 1.1 | 0.00 |
|-------------------------------------------------------|-----|-----|-------|-----|-----|-------|-----|-----|-------|-----|-----|------|

- Characteristics are based on deep vein thrombosis as the outcome event. Numbers are slightly different for other outcome events, as patients with prior history of that event were excluded from the analysis.

Supplementary Table 4. Baseline characteristics of eligible Ad26.COVID.S, BNT162b2, and mRNA-1273 cohorts of vaccinated people identified US Open Claims.

| Characteristic                              | US Open Claims     |           |       |                   |           |       | US Open Claims     |           |       |                   |           |       |
|---------------------------------------------|--------------------|-----------|-------|-------------------|-----------|-------|--------------------|-----------|-------|-------------------|-----------|-------|
|                                             | Before PS matching |           |       | After PS matching |           |       | Before PS matching |           |       | After PS matching |           |       |
|                                             | Ad26.COVID.S       | BNT162b2  | SMD   | Ad26.COVID.S      | BNT162b2  | SMD   | Ad26.COVID.S       | mRNA-1273 | SMD   | Ad26.COVID.S      | mRNA-1273 | SMD   |
| <b>Cohort Count</b>                         | 628,004            | 5,288,749 |       | 628,002           | 2,363,428 |       | 628,164            | 3,923,371 |       | 628,164           | 2,230,157 |       |
| <b>Age group</b>                            |                    |           |       |                   |           |       |                    |           |       |                   |           |       |
| <20                                         | 2.2                | 4.7       | -0.14 | 1.8               | 1.9       | -0.01 | 2.2                | 1.6       | 0.04  | 1.8               | 1.9       | 0.00  |
| 20 - 29                                     | 13.4               | 16        | -0.07 | 10.4              | 10.9      | -0.02 | 13.4               | 11.5      | 0.06  | 10.4              | 10.9      | -0.01 |
| 30 - 39                                     | 15.2               | 17        | -0.05 | 12.7              | 13.1      | -0.01 | 15.2               | 13.1      | 0.06  | 12.7              | 13        | -0.01 |
| 40 - 49                                     | 17.3               | 16.9      | 0.01  | 16.3              | 16.5      | -0.01 | 17.3               | 14.2      | 0.08  | 16.3              | 16.1      | 0.01  |
| 50 - 59                                     | 22.1               | 17.7      | 0.11  | 23.5              | 23.6      | 0.00  | 22.1               | 17.9      | 0.10  | 23.5              | 22.9      | 0.02  |
| 60 - 69                                     | 18.9               | 15.1      | 0.10  | 21.8              | 21.4      | 0.01  | 18.9               | 20.6      | -0.04 | 21.8              | 21.8      | 0.00  |
| 70 - 79                                     | 7.6                | 8.2       | -0.02 | 9.3               | 8.6       | 0.02  | 7.6                | 14        | -0.21 | 9.3               | 9.3       | 0.00  |
| 80 - 89                                     | 3.3                | 4.5       | -0.06 | 4.1               | 3.9       | 0.01  | 3.3                | 6.9       | -0.16 | 4.1               | 4.3       | -0.01 |
| <b>Gender: female</b>                       | 47                 | 54.5      | -0.15 | 52                | 52.8      | -0.02 | 47                 | 54        | -0.14 | 52                | 53.4      | -0.03 |
| <b>Index month</b>                          |                    |           |       |                   |           |       |                    |           |       |                   |           |       |
| 12                                          |                    | 1         |       |                   |           |       |                    | 0.7       |       |                   |           |       |
| 1                                           |                    | 6         |       |                   |           |       |                    | 8.9       |       |                   |           |       |
| 2                                           |                    | 6.9       |       |                   |           |       |                    | 15.4      |       |                   |           |       |
| 3                                           | 23                 | 20        | 0.07  | 26.9              | 29.3      | -0.06 | 23                 | 29.9      | -0.16 | 26.9              | 30.7      | -0.09 |
| 4                                           | 33.5               | 21.6      | 0.27  | 35.2              | 34.3      | 0.02  | 33.5               | 23.9      | 0.21  | 35.2              | 35        | 0.00  |
| 5                                           | 21.3               | 11.8      | 0.26  | 20                | 18        | 0.05  | 21.3               | 11.7      | 0.26  | 20                | 18.6      | 0.04  |
| 6                                           | 10.5               | 7.8       | 0.09  | 9.2               | 8.9       | 0.01  | 10.5               | 2.9       | 0.31  | 9.2               | 7.2       | 0.07  |
| 7                                           | 5.9                | 9         | -0.12 | 4.7               | 5         | -0.01 | 5.9                | 3.8       | 0.10  | 4.7               | 4.7       | 0.00  |
| 8                                           | 5.3                | 14.1      | -0.30 | 3.7               | 4.1       | -0.02 | 5.3                | 2.5       | 0.15  | 3.7               | 3.5       | 0.01  |
| 9                                           | 0.5                | 1.9       | -0.13 | 0.3               | 0.3       | -0.01 | 0.5                | 0.2       | 0.05  | 0.3               | 0.3       | 0.00  |
| <b>Covid-19 infection prior vaccination</b> | 2.9                | 3.3       | -0.02 | 3.4               | 3.6       | -0.01 | 2.9                | 2.8       | 0.01  | 3.4               | 3.5       | 0.00  |
| <b>Charlson index - Romano adaptation</b>   | 108.2              | 113.3     | -0.03 | 137.7             | 136.2     | 0.01  | 108.2              | 145.6     | -0.17 | 137.7             | 139.7     | -0.01 |
| <b>CHADS2VASc</b>                           | 129                | 138.5     | -0.07 | 155.7             | 153.2     | 0.02  | 129                | 173.1     | -0.29 | 155.7             | 158.3     | -0.02 |
| <b>Medical history: General</b>             |                    |           |       |                   |           |       |                    |           |       |                   |           |       |
| Acute respiratory disease                   | 45.2               | 45.3      | 0.00  | 50.8              | 52        | -0.03 | 45.2               | 46.4      | -0.02 | 50.8              | 51.4      | -0.01 |
| Attention deficit hyperactivity disorder    | 4.4                | 4.2       | 0.01  | 5                 | 5.3       | -0.01 | 4.4                | 3.5       | 0.05  | 5                 | 5         | 0.00  |
| Chronic obstructive lung disease            | 5.4                | 5         | 0.02  | 7                 | 6.6       | 0.02  | 5.4                | 7.1       | -0.07 | 7                 | 7.2       | -0.01 |
| Crohn's disease                             | 0.5                | 0.6       | 0.00  | 0.7               | 0.7       | 0.00  | 0.5                | 0.6       | -0.01 | 0.7               | 0.7       | 0.00  |
| Dementia                                    | 1.2                | 1.9       | -0.06 | 1.5               | 1.5       | 0.00  | 1.2                | 1.9       | -0.06 | 1.5               | 1.5       | 0.00  |
| Diabetes mellitus                           | 12.9               | 13        | 0.00  | 16.8              | 16.6      | 0.01  | 12.9               | 17        | -0.12 | 16.8              | 17.1      | -0.01 |
| Gastrointestinal hemorrhage                 | 5.9                | 5.9       | 0.00  | 7.2               | 7.4       | -0.01 | 5.9                | 7.2       | -0.05 | 7.2               | 7.4       | -0.01 |
| Human immunodeficiency virus infection      | 0.4                | 0.4       | -0.01 | 0.5               | 0.5       | -0.01 | 0.4                | 0.4       | -0.01 | 0.5               | 0.5       | 0.00  |
| Hyperlipidemia                              | 31.4               | 29.8      | 0.03  | 39.6              | 39.4      | 0.01  | 31.4               | 38.9      | -0.16 | 39.6              | 39.7      | 0.00  |
| Hypertensive disorder                       | 30.7               | 29.3      | 0.03  | 39.4              | 38.7      | 0.02  | 30.7               | 38.1      | -0.16 | 39.4              | 39.5      | 0.00  |
| Lesion of liver                             | 1                  | 1         | 0.00  | 1.2               | 1.3       | 0.00  | 1                  | 1.2       | -0.02 | 1.2               | 1.2       | 0.00  |
| Obesity                                     | 13.7               | 13.9      | -0.01 | 16.9              | 17        | 0.00  | 13.7               | 15.4      | -0.05 | 16.9              | 17        | -0.01 |



|                                                       |      |      |       |      |      |       |      |      |       |      |      |       |
|-------------------------------------------------------|------|------|-------|------|------|-------|------|------|-------|------|------|-------|
| Osteoarthritis                                        | 25.6 | 23.4 | 0.05  | 32   | 31.6 | 0.01  | 25.6 | 30.8 | -0.12 | 32   | 31.9 | 0.00  |
| Pneumonia                                             | 6.9  | 7.3  | -0.02 | 8.1  | 8.1  | 0.00  | 6.9  | 8    | -0.05 | 8.1  | 8.3  | 0.00  |
| Psoriasis                                             | 1.9  | 1.8  | 0.00  | 2.4  | 2.4  | 0.00  | 1.9  | 2.2  | -0.02 | 2.4  | 2.4  | 0.00  |
| Renal impairment                                      | 5.4  | 6    | -0.03 | 6.9  | 6.8  | 0.01  | 5.4  | 8.1  | -0.11 | 6.9  | 7.1  | -0.01 |
| Rheumatoid arthritis                                  | 1.6  | 1.7  | -0.01 | 2.1  | 2    | 0.01  | 1.6  | 2.2  | -0.04 | 2.1  | 2.2  | -0.01 |
| Schizophrenia                                         | 0.6  | 0.7  | -0.02 | 0.8  | 0.8  | 0.00  | 0.6  | 0.7  | -0.01 | 0.8  | 0.8  | 0.00  |
| Urinary tract infectious disease                      | 14.3 | 16.2 | -0.05 | 17.6 | 18   | -0.01 | 14.3 | 17.8 | -0.10 | 17.6 | 18.2 | -0.02 |
| Visual system disorder                                | 35.9 | 36.5 | -0.01 | 41.7 | 42.1 | -0.01 | 35.9 | 41.3 | -0.11 | 41.6 | 42   | -0.01 |
| <b>Medical history: Cardiovascular disease</b>        |      |      |       |      |      |       |      |      |       |      |      |       |
| Atrial fibrillation                                   | 2.9  | 3.3  | -0.02 | 3.7  | 3.5  | 0.01  | 2.9  | 4.7  | -0.09 | 3.7  | 3.8  | 0.00  |
| Cerebrovascular disease                               | 4.9  | 5.2  | -0.01 | 6.4  | 6.2  | 0.01  | 4.9  | 7.4  | -0.10 | 6.4  | 6.5  | -0.01 |
| Coronary atherosclerosis                              | 6.1  | 6.1  | 0.00  | 8    | 7.6  | 0.02  | 6.1  | 9.1  | -0.11 | 8    | 8.1  | 0.00  |
| Heart disease                                         | 17.9 | 18.1 | 0.00  | 22.7 | 22.3 | 0.01  | 17.9 | 23.9 | -0.15 | 22.7 | 22.9 | 0.00  |
| Heart failure                                         | 3.3  | 3.8  | -0.03 | 4.2  | 4.1  | 0.01  | 3.3  | 5    | -0.09 | 4.2  | 4.3  | -0.01 |
| Peripheral vascular disease                           | 4    | 4.4  | -0.02 | 5.1  | 5    | 0.01  | 4    | 6    | -0.09 | 5.1  | 5.3  | -0.01 |
| Pulmonary embolism                                    | 0.8  | 0.9  | -0.01 | 0.6  | 0.7  | 0.00  | 0.8  | 1.1  | -0.04 | 0.6  | 0.7  | -0.01 |
| Venous thrombosis                                     | 2.1  | 2.2  | -0.01 | 1.4  | 1.4  | 0.00  | 2.1  | 2.8  | -0.05 | 1.4  | 1.4  | 0.00  |
| <b>Medical history: Neoplasms</b>                     |      |      |       |      |      |       |      |      |       |      |      |       |
| Malignant tumor of breast                             | 1.3  | 1.5  | -0.02 | 1.7  | 1.7  | 0.00  | 1.3  | 2    | -0.06 | 1.7  | 1.7  | 0.00  |
| Hematologic neoplasm                                  | 1.1  | 1.2  | -0.01 | 1.4  | 1.4  | 0.00  | 1.1  | 1.5  | -0.04 | 1.4  | 1.4  | 0.00  |
| Malignant neoplasm of anorectum                       | 0.2  | 0.2  | 0.00  | 0.3  | 0.3  | 0.01  | 0.2  | 0.3  | -0.01 | 0.3  | 0.3  | 0.00  |
| Malignant neoplastic disease                          | 8.5  | 8.7  | -0.01 | 10.8 | 10.4 | 0.01  | 8.5  | 12.2 | -0.12 | 10.8 | 10.7 | 0.00  |
| Malignant tumor of colon                              | 0.4  | 0.4  | 0.00  | 0.5  | 0.5  | 0.00  | 0.4  | 0.6  | -0.03 | 0.5  | 0.5  | 0.00  |
| Malignant tumor of urinary bladder                    | 0.3  | 0.3  | 0.00  | 0.3  | 0.3  | 0.00  | 0.3  | 0.4  | -0.03 | 0.3  | 0.3  | 0.00  |
| Primary malignant neoplasm of prostate                | 1    | 1    | -0.01 | 1.3  | 1.2  | 0.01  | 1    | 1.6  | -0.06 | 1.3  | 1.3  | 0.00  |
| <b>Medication use</b>                                 |      |      |       |      |      |       |      |      |       |      |      |       |
| Agents acting on the renin-angiotensin system         | 17.5 | 15.5 | 0.05  | 25.1 | 24.3 | 0.02  | 17.5 | 21.5 | -0.10 | 25.1 | 24.7 | 0.01  |
| Beta blocking agents                                  | 10.4 | 9.8  | 0.02  | 14.9 | 14.3 | 0.02  | 10.4 | 13.8 | -0.10 | 14.8 | 14.8 | 0.00  |
| Diuretics                                             | 11.4 | 10.6 | 0.03  | 16.2 | 15.7 | 0.01  | 11.4 | 14.3 | -0.09 | 16.2 | 16   | 0.01  |
| Drugs for acid related disorders                      | 10.8 | 10.5 | 0.01  | 15.2 | 14.8 | 0.01  | 10.8 | 13.4 | -0.08 | 15.2 | 15.2 | 0.00  |
| Calcium channel blockers                              | 8.3  | 7.9  | 0.02  | 11.8 | 11.5 | 0.01  | 8.3  | 10.8 | -0.09 | 11.8 | 11.8 | 0.00  |
| Antiinflammatory and antirheumatic products           | 12.9 | 12.8 | 0.00  | 17.2 | 17   | 0.00  | 12.8 | 14.2 | -0.04 | 17.2 | 17.2 | 0.00  |
| Drugs used in diabetes                                | 8.7  | 8.2  | 0.02  | 12.5 | 12.2 | 0.01  | 8.7  | 11   | -0.08 | 12.5 | 12.5 | 0.00  |
| Antibacterials for systemic use                       | 20.9 | 21.5 | -0.01 | 26.7 | 26.9 | 0.00  | 20.9 | 23.1 | -0.05 | 26.7 | 26.6 | 0.00  |
| Opioids                                               | 7.7  | 7.1  | 0.02  | 10.3 | 10.1 | 0.01  | 7.7  | 8.3  | -0.02 | 10.3 | 10.2 | 0.01  |
| Antineoplastic agents                                 | 2.3  | 2.5  | -0.01 | 3.2  | 3.2  | 0.00  | 2.3  | 3    | -0.04 | 3.2  | 3.3  | -0.01 |
| Immunosuppressants                                    |      |      |       |      |      |       | 1.4  | 1.9  | -0.04 | 2    | 2    | 0.00  |
| Antiepileptics                                        | 8.7  | 7.9  | 0.03  | 12.3 | 12.1 | 0.01  | 8.7  | 9.9  | -0.04 | 12.3 | 12.1 | 0.01  |
| Psycholeptics                                         | 11.3 | 10.6 | 0.02  | 15.9 | 15.8 | 0.00  | 11.3 | 12.3 | -0.03 | 15.8 | 15.5 | 0.01  |
| Antipsoriatics                                        | 0.3  | 0.3  | -0.01 | 0.4  | 0.4  | 0.00  | 0.3  | 0.4  | -0.01 | 0.4  | 0.4  | 0.00  |
| Antidepressants                                       | 17.3 | 16.2 | 0.03  | 24.5 | 24.7 | 0.00  | 17.3 | 18.7 | -0.04 | 24.5 | 24.2 | 0.01  |
| Psychostimulants, agents used for adhd and nootropics | 3.4  | 3.2  | 0.01  | 4.9  | 5.1  | -0.01 | 3.4  | 2.9  | 0.03  | 4.9  | 4.7  | 0.01  |

- Characteristics are based on deep vein thrombosis as the outcome event. Numbers are slightly different for other outcome events, as patients with prior history of that event were excluded from the analysis.

Supplementary Table 5. Baseline characteristics of eligible cohorts of vaccinated people identified in IQVIA LPD France

| Characteristic | Before PS matching |          |     | After PS matching |          |     |
|----------------|--------------------|----------|-----|-------------------|----------|-----|
|                | ChAdOx1            | BNT162b2 |     | ChAdOx1           | BNT162b2 |     |
|                | %                  | %        | SMD | %                 | %        | SMD |

|                                        |        |        |       |       |        |       |
|----------------------------------------|--------|--------|-------|-------|--------|-------|
| <b>Cohort count</b>                    | 25,663 | 12,244 |       | 6,991 | 15,042 |       |
| <b>Age group</b>                       |        |        |       |       |        |       |
| 20 - 29                                | 0.3    | 3.7    | -0.24 | 0.9   | 0.8    | 0.01  |
| 30 - 39                                | 0.6    | 4.5    | -0.25 | 1.6   | 1.3    | 0.02  |
| 40 - 49                                | 1.6    | 8.7    | -0.33 | 3.9   | 3.1    | 0.04  |
| 50 - 59                                | 23.2   | 14.1   | 0.24  | 17.9  | 18.9   | -0.02 |
| 60 - 69                                | 44.1   | 18.7   | 0.57  | 27.4  | 28.2   | -0.02 |
| 70 - 79                                | 24.5   | 28.4   | -0.09 | 33.0  | 32.8   | 0.00  |
| 80 - 89                                | 4.5    | 17.9   | -0.43 | 12.8  | 12.6   | 0.01  |
| 90 - 99                                | 1.1    | 3.1    | -0.14 | 2.4   | 2.2    | 0.01  |
| Gender: female                         | 47.6   | 56.4   | -0.17 | 54.5  | 54.2   | 0.00  |
| <b>Index month</b>                     |        |        |       |       |        |       |
| 2                                      | 3.6    | 9.0    | -0.22 | 6.5   | 5.9    | 0.02  |
| 3                                      | 50.3   | 20.5   | 0.66  | 29.9  | 31.3   | -0.03 |
| 4                                      | 26.5   | 22.3   | 0.10  | 30.6  | 31.1   | -0.01 |
| 5                                      | 9.7    | 17.8   | -0.24 | 18.0  | 17.2   | 0.02  |
| 6                                      | 7.0    | 10.6   | -0.13 | 10.4  | 9.9    | 0.02  |
| 7                                      | 2.6    | 6.1    | -0.17 | 4.2   | 4.2    | 0.00  |
| 8                                      | 0.1    | 3.5    | -0.25 | 0.2   | 0.2    | 0.01  |
| <b>Covid-19 history</b>                |        |        |       |       |        |       |
| Covid-19 infection prior vaccination   | 4.7    | 6.1    | -0.06 | 5.0   | 4.8    | 0.01  |
| <b>Medical history: General</b>        |        |        |       |       |        |       |
| Acute respiratory disease              | 44.2   | 45.5   | -0.02 | 43.8  | 43.4   | 0.01  |
| Chronic liver disease                  | 0.5    | 0.4    | 0.02  | 0.5   | 0.5    | -0.01 |
| Chronic obstructive lung disease       | 4.9    | 4.4    | 0.02  | 4.5   | 4.7    | -0.01 |
| Crohn's disease                        | 0.2    | 0.4    | -0.03 | 0.3   | 0.3    | -0.01 |
| Dementia                               | 0.3    | 0.4    | -0.02 | 0.5   | 0.4    | 0.01  |
| Depressive disorder                    | 17.9   | 19.0   | -0.03 | 18.1  | 18.7   | -0.01 |
| Diabetes mellitus                      | 19.9   | 15.3   | 0.12  | 16.7  | 17.3   | -0.01 |
| Gastroesophageal reflux disease        | 16.3   | 18.2   | -0.05 | 18.1  | 18.4   | -0.01 |
| Gastrointestinal hemorrhage            | 3.3    | 3.8    | -0.03 | 3.5   | 3.6    | 0.00  |
| Human immunodeficiency virus infection | 0.6    | 0.4    | 0.04  | 0.4   | 0.4    | 0.00  |
| Hyperlipidemia                         | 20.8   | 22.1   | -0.03 | 23.0  | 23.2   | -0.01 |
| Hypertensive disorder                  | 44.1   | 44.1   | 0.00  | 46.9  | 47.3   | -0.01 |
| Lesion of liver                        | 0.6    | 0.5    | 0.01  | 0.6   | 0.5    | 0.01  |
| Obesity                                | 1.3    | 0.9    | 0.04  | 1.0   | 0.9    | 0.01  |
| Osteoarthritis                         | 22.3   | 22.7   | -0.01 | 23.5  | 23.8   | -0.01 |
| Pneumonia                              | 4.5    | 4.8    | -0.01 | 4.6   | 4.9    | -0.01 |
| Psoriasis                              | 4.4    | 4.2    | 0.01  | 4.4   | 4.5    | 0.00  |
| Renal impairment                       | 1.4    | 2.5    | -0.08 | 2.1   | 2.2    | 0.00  |
| Rheumatoid arthritis                   | 0.7    | 1.0    | -0.03 | 0.9   | 0.9    | 0.00  |
| Schizophrenia                          | 0.1    | 0.1    | 0.01  | 0.1   | <0.1   | 0.00  |
| Ulcerative colitis                     | 0.3    | 0.3    | -0.01 | 0.2   | 0.3    | -0.02 |

|                                                       |      |      |       |      |      |       |
|-------------------------------------------------------|------|------|-------|------|------|-------|
| Urinary tract infectious disease                      | 7.1  | 8.9  | -0.06 | 7.9  | 8.2  | -0.01 |
| Viral hepatitis C                                     | 0.3  | 0.2  | 0.02  | 0.2  | 0.3  | -0.01 |
| Visual system disorder                                | 21.0 | 23.7 | -0.06 | 22.6 | 22.1 | 0.01  |
| <b>Medical history: Cardiovascular disease</b>        |      |      |       |      |      |       |
| Atrial fibrillation                                   | 0.8  | 1.5  | -0.07 | 1.1  | 1.2  | 0.00  |
| Cerebrovascular disease                               | 4.0  | 5.2  | -0.06 | 3.0  | 3.2  | -0.01 |
| Coronary arteriosclerosis                             | 2.2  | 2.3  | -0.01 | 2.5  | 2.3  | 0.01  |
| Heart disease                                         | 14.7 | 18.1 | -0.09 | 17.3 | 16.9 | 0.01  |
| Heart failure                                         | 1.2  | 2.1  | -0.07 | 1.9  | 1.7  | 0.02  |
| Ischemic heart disease                                | 4.9  | 4.8  | 0.00  | 4.8  | 5.0  | -0.01 |
| Peripheral vascular disease                           | 1.6  | 1.3  | 0.02  | 1.5  | 1.6  | 0.00  |
| Pulmonary embolism                                    | 0.7  | 1.1  | -0.04 | 0.9  | 0.9  | -0.01 |
| Venous thrombosis                                     | 2.0  | 2.8  | -0.05 | 2.5  | 2.6  | -0.01 |
| <b>Medical history: Neoplasms</b>                     |      |      |       |      |      |       |
| Hematologic neoplasm                                  | 0.3  | 0.5  | -0.03 | 0.5  | 0.5  | 0.00  |
| Malignant lymphoma                                    | 0.3  | 0.6  | -0.05 | 0.5  | 0.6  | -0.01 |
| Malignant neoplasm of anorectum                       | 1.5  | 0.9  | 0.06  | 0.9  | 1.0  | -0.01 |
| Malignant neoplastic disease                          | 7.8  | 9.2  | -0.05 | 8.6  | 9.0  | -0.01 |
| Malignant tumor of breast                             | 1.8  | 2.2  | -0.03 | 2.2  | 2.2  | 0.00  |
| Malignant tumor of colon                              | 1.5  | 0.9  | 0.06  | 1.0  | 1.1  | 0.00  |
| Malignant tumor of urinary bladder                    | 0.2  | 0.4  | -0.03 | 0.3  | 0.3  | 0.00  |
| Primary malignant neoplasm of prostate                | 1.7  | 1.7  | 0.00  | 1.7  | 1.7  | 0.00  |
| <b>Medication use</b>                                 |      |      |       |      |      |       |
| Agents acting on the renin-angiotensin system         | 35.6 | 33.5 | 0.04  | 36.8 | 37.2 | -0.01 |
| Antidepressants                                       | 10.3 | 11.4 | -0.03 | 10.9 | 11.1 | 0.00  |
| Antiepileptics                                        | 4.0  | 4.1  | -0.01 | 4.3  | 4.4  | 0.00  |
| Antiinflammatory and antirheumatic products           | 34.5 | 34.7 | 0.00  | 34.7 | 34.8 | 0.00  |
| Antineoplastic agents                                 | 0.9  | 0.9  | 0.00  | 0.9  | 1.0  | 0.00  |
| Antipsoriatics                                        | 0.5  | 0.6  | -0.01 | 0.6  | 0.6  | 0.00  |
| Antithrombotic agents                                 | 22.8 | 25.9 | -0.07 | 24.6 | 24.3 | 0.01  |
| Beta blocking agents                                  | 19.7 | 21.6 | -0.04 | 22.3 | 22.4 | 0.00  |
| Diuretics                                             | 19.5 | 20.4 | -0.02 | 21.7 | 21.8 | 0.00  |
| Drugs for acid related disorders                      | 28.0 | 30.1 | -0.04 | 30.1 | 30.4 | 0.00  |
| Drugs for obstructive airway diseases                 | 17.7 | 17.9 | -0.01 | 18.1 | 18.2 | 0.00  |
| Drugs used in diabetes                                | 17.2 | 12.9 | 0.12  | 14.4 | 14.8 | -0.01 |
| Immunosuppressants                                    | 0.4  | 0.7  | -0.04 | 0.6  | 0.6  | 0.00  |
| Lipid modifying agents                                | 31.5 | 29.1 | 0.05  | 31.4 | 31.7 | -0.01 |
| Opioids                                               | 13.5 | 12.9 | 0.02  | 13.3 | 13.0 | 0.01  |
| Psycholeptics                                         | 17.3 | 18.4 | -0.03 | 18.8 | 18.7 | 0.00  |
| Psychostimulants, agents used for adhd and nootropics | 3.0  | 3.3  | -0.02 | 3.3  | 3.3  | 0.00  |

- Characteristics are based on deep vein thrombosis as the outcome event. Numbers are slightly different for other outcome events, as patients with prior history of that event were excluded from the analysis.

Supplementary Table 6. Baseline characteristics of eligible cohorts of vaccinated people identified in IPCI

| Characteristic                                 | Before PS matching |          |       | After PS matching |          |       |
|------------------------------------------------|--------------------|----------|-------|-------------------|----------|-------|
|                                                | ChAdOx1            | BNT162b2 | SMD   | ChAdOx1           | BNT162b2 | SMD   |
| Cohort count                                   | 70,427             | 208,713  |       | 22,039            | 49,198   |       |
| <b>Age group</b>                               |                    |          |       |                   |          |       |
| 10 - 19                                        | 0.2                | 0.8      | -0.08 | 0.5               | 0.4      | 0.01  |
| 20 - 29                                        | 1.7                | 5.2      | -0.19 | 4.1               | 3.6      | 0.03  |
| 30 - 39                                        | 1.8                | 11.3     | -0.39 | 4.6               | 3.7      | 0.04  |
| 40 - 49                                        | 3.0                | 9.1      | -0.26 | 6.6               | 5.7      | 0.04  |
| 50 - 59                                        | 5.7                | 21.3     | -0.47 | 13.0              | 10.7     | 0.07  |
| 60 - 69                                        | 83.5               | 15.0     | 1.89  | 59.6              | 61.5     | -0.04 |
| 70 - 79                                        | 1.7                | 26.5     | -0.76 | 5.2               | 7.5      | -0.09 |
| 80 - 89                                        | 1.4                | 9.9      | -0.38 | 3.9               | 4.1      | -0.01 |
| 90 - 99                                        | 0.9                | 1.0      | -0.02 | 2.4               | 2.7      | -0.02 |
| Gender: female                                 | 50.3               | 51.2     | -0.02 | 54.6              | 55.2     | -0.01 |
| <b>Index month</b>                             |                    |          |       |                   |          |       |
| 2                                              | 3.0                | 0.2      | 0.23  | 1.1               | 1.1      | 0.00  |
| 3                                              | 18.5               | 7.6      | 0.33  | 7.4               | 7.5      | 0.00  |
| 4                                              | 42.4               | 24.0     | 0.40  | 22.5              | 24.5     | -0.05 |
| 5                                              | 29.4               | 30.7     | -0.03 | 52.3              | 52.3     | 0.00  |
| 6                                              | 6.8                | 37.5     | -0.80 | 16.6              | 14.5     | 0.06  |
| <b>Covid-19 history</b>                        |                    |          |       |                   |          |       |
| Covid-19 infection prior vaccination           | 6.9                | 5.4      | 0.065 | 6.4               | 6.3      | 0.003 |
| <b>Medical history: General</b>                |                    |          |       |                   |          |       |
| Attention deficit hyperactivity disorder       | 1.0                | 1.5      | -0.05 | 1.4               | 1.3      | 0.01  |
| Chronic liver disease                          | 0.2                | 0.2      | 0.01  | 0.2               | 0.2      | 0.00  |
| Chronic obstructive lung disease               | 6.0                | 5.1      | 0.04  | 5.6               | 6.1      | -0.02 |
| Crohn's disease                                | 0.4                | 0.5      | -0.01 | 0.4               | 0.4      | 0.00  |
| Dementia                                       | 0.5                | 1.0      | -0.06 | 1.0               | 1.2      | -0.02 |
| Depressive disorder                            | 11.4               | 9.3      | 0.07  | 11.1              | 11.2     | 0.00  |
| Diabetes mellitus                              | 12.5               | 12.6     | 0.00  | 12.4              | 13.0     | -0.02 |
| Gastroesophageal reflux disease                | 3.4                | 3.5      | -0.01 | 3.3               | 3.5      | -0.01 |
| Gastrointestinal hemorrhage                    | 6.1                | 5.8      | 0.01  | 5.9               | 6.1      | -0.01 |
| Human immunodeficiency virus infection         | 0.2                | 0.1      | 0.01  | 0.2               | 0.2      | 0.00  |
| Hyperlipidemia                                 | 14.8               | 13.2     | 0.05  | 13.1              | 13.9     | -0.02 |
| Hypertensive disorder                          | 32.7               | 31.3     | 0.03  | 30.6              | 32.6     | -0.04 |
| Obesity                                        | 8.0                | 4.9      | 0.13  | 7.7               | 7.7      | 0.00  |
| Osteoarthritis                                 | 18.4               | 19.7     | -0.03 | 18.3              | 19.8     | -0.04 |
| Pneumonia                                      | 11.1               | 11.4     | -0.01 | 11.3              | 11.8     | -0.02 |
| Psoriasis                                      | 4.7                | 4.3      | 0.02  | 4.4               | 4.6      | -0.01 |
| Renal impairment                               | 3.7                | 6.8      | -0.14 | 5.0               | 5.6      | -0.03 |
| Rheumatoid arthritis                           | 2.7                | 2.9      | -0.01 | 2.8               | 3.0      | -0.01 |
| Schizophrenia                                  | 0.3                | 0.2      | 0.02  | 0.3               | 0.4      | 0.00  |
| Urinary tract infectious disease               | 24.1               | 26.2     | -0.05 | 26.6              | 27.2     | -0.01 |
| Viral hepatitis C                              | 0.1                | 0.1      | 0.02  | 0.1               | 0.1      | 0.01  |
| Visual system disorder                         | 48.5               | 51.9     | -0.07 | 49.1              | 50.3     | -0.02 |
| <b>Medical history: Cardiovascular disease</b> |                    |          |       |                   |          |       |
| Cerebrovascular disease                        | 4.7                | 5.7      | -0.05 | 3.3               | 3.7      | -0.03 |
| Coronary arteriosclerosis                      | 0.8                | 0.8      | 0.00  | 0.8               | 0.8      | 0.00  |
| Heart disease                                  | 17.1               | 19.6     | -0.06 | 17.5              | 18.9     | -0.04 |

|                                                       |      |      |       |      |      |       |
|-------------------------------------------------------|------|------|-------|------|------|-------|
| Heart failure                                         | 1.8  | 2.4  | -0.04 | 2.5  | 2.8  | -0.02 |
| Ischemic heart disease                                | 8.1  | 9.0  | -0.04 | 8.2  | 8.8  | -0.02 |
| Peripheral vascular disease                           | 1.3  | 1.4  | -0.01 | 1.4  | 1.6  | -0.01 |
| Venous thrombosis                                     | 3.6  | 3.8  | -0.01 | 3.9  | 4.3  | -0.02 |
| Medical history: Neoplasms                            |      |      |       |      |      |       |
| Hematologic neoplasm                                  | 0.2  | 0.3  | -0.01 | 0.2  | 0.2  | 0.00  |
| Malignant lymphoma                                    | 0.2  | 0.3  | -0.01 | 0.2  | 0.2  | -0.01 |
| Malignant neoplastic disease                          | 14.8 | 17.3 | -0.07 | 15.3 | 16.1 | -0.02 |
| Malignant tumor of breast                             | 2.9  | 2.8  | 0.01  | 2.8  | 2.9  | -0.01 |
| Malignant tumor of urinary bladder                    | 0.5  | 0.7  | -0.03 | 0.5  | 0.5  | 0.00  |
| <b>Medication use</b>                                 |      |      |       |      |      |       |
| Agents acting on the renin-angiotensin system         | 20.9 | 21.5 | -0.01 | 19.9 | 21.3 | -0.03 |
| Antibacterials for systemic use                       | 12.9 | 14.5 | -0.05 | 14.6 | 15.3 | -0.02 |
| Antidepressants                                       | 9.1  | 7.9  | 0.04  | 8.9  | 9.3  | -0.02 |
| Antiepileptics                                        | 2.9  | 2.6  | 0.02  | 3.0  | 3.1  | -0.01 |
| Antineoplastic agents                                 | 1.7  | 2.4  | -0.04 | 2.0  | 2.1  | -0.01 |
| Antipsoriatics                                        | 0.5  | 0.5  | 0.00  | 0.5  | 0.6  | -0.01 |
| Antithrombotic agents                                 | 13.7 | 17.5 | -0.10 | 13.7 | 15.0 | -0.04 |
| Beta blocking agents                                  | 14.3 | 17.2 | -0.08 | 14.9 | 16.1 | -0.04 |
| Calcium channel blockers                              | 11.0 | 11.4 | -0.01 | 10.2 | 11.1 | -0.03 |
| Diuretics                                             | 13.3 | 13.7 | -0.01 | 13.0 | 14.3 | -0.04 |
| Drugs for acid related disorders                      | 25.0 | 27.3 | -0.05 | 25.6 | 27.2 | -0.04 |
| Drugs for obstructive airway diseases                 | 20.6 | 20.7 | 0.00  | 21.3 | 21.8 | -0.01 |
| Drugs used in diabetes                                | 8.6  | 8.5  | 0.00  | 8.6  | 9.0  | -0.01 |
| Immunosuppressants                                    | 1.4  | 1.9  | -0.04 | 1.7  | 1.8  | -0.01 |
| Lipid modifying agents                                | 22.7 | 23.6 | -0.02 | 20.8 | 22.3 | -0.04 |
| Opioids                                               | 7.0  | 6.4  | 0.03  | 7.3  | 7.7  | -0.01 |
| Psycholeptics                                         | 9.9  | 9.8  | 0.00  | 10.6 | 11.0 | -0.01 |
| Psychostimulants, agents used for adhd and nootropics | 0.5  | 0.7  | -0.03 | 0.7  | 0.7  | 0.00  |

- Characteristics are based on deep vein thrombosis as the outcome event. Numbers are slightly different for other outcome events, as patients with prior history of that event were excluded from the analysis.

Supplementary Table 7. Baseline characteristics of eligible cohorts of vaccinated people identified in IQVIA US Hospital CDM

| Characteristic | Before PS matching |          |       | After PS matching |          |       |
|----------------|--------------------|----------|-------|-------------------|----------|-------|
|                | Ad26.COVS.S        | BNT162b2 | SMD   | Ad26.COVS.S       | BNT162b2 | SMD   |
|                | %                  | %        |       | %                 | %        |       |
| Coort Count    | 1,680              | 243,796  |       | 1,658             | 6,317    |       |
| Age group      |                    |          |       |                   |          |       |
| 10 - 19        | 1.1                | 1.6      | -0.04 | 0.7               | 0.5      | 0.03  |
| 20 - 29        | 8.1                | 6.5      | 0.06  | 4.6               | 4.0      | 0.03  |
| 30 - 39        | 13.0               | 9.2      | 0.12  | 9.4               | 9.2      | 0.01  |
| 40 - 49        | 14.7               | 11.5     | 0.10  | 11.8              | 11.0     | 0.03  |
| 50 - 59        | 25.4               | 15.9     | 0.24  | 26.4              | 27.9     | -0.03 |
| 70 - 79        | 7.9                | 23.2     | -0.43 | 9.5               | 10.1     | -0.02 |
| 80 - 89        | 2.2                | 9.0      | -0.30 | 2.4               | 2.3      | 0.01  |
| Gender: female | 54.3               | 59.1     | -0.10 | 58.8              | 59.9     | -0.02 |
| Index month    |                    |          |       |                   |          |       |
| 3              | 31.1               | 33.7     | -0.06 | 49.5              | 50.2     | -0.01 |
| 4              | 62.6               | 20.6     | 0.94  | 44.1              | 43.6     | 0.01  |
| 5              | 3.1                | 3.3      | -0.02 | 3.3               | 3.4      | -0.01 |

|                                               |      |      |       |      |      |       |
|-----------------------------------------------|------|------|-------|------|------|-------|
| 6                                             | 2.1  | 1.2  | 0.07  | 2.5  | 2.4  | 0.01  |
| 7                                             | 1.1  | 0.5  | 0.07  | 0.7  | 0.4  | 0.05  |
| Covid-19 history                              |      |      |       |      |      |       |
| Covid-19 infection prior vaccination          | 1.9  | 1.8  | 0.01  | 3.4  | 3.8  | -0.02 |
| Medical history: General                      |      |      |       |      |      |       |
| Attention deficit hyperactivity disorder      | 1.1  | 1.0  | 0.01  | 1.0  | 1.1  | -0.02 |
| Chronic liver disease                         | 2.9  | 2.3  | 0.04  | 5.6  | 5.2  | 0.02  |
| Chronic obstructive lung disease              | 5.0  | 5.4  | -0.02 | 8.8  | 8.5  | 0.01  |
| Crohn's disease                               | 0.5  | 0.6  | -0.01 | 0.8  | 0.7  | 0.01  |
| Depressive disorder                           | 10.9 | 11.1 | -0.01 | 16.7 | 16.9 | -0.01 |
| Diabetes mellitus                             | 13.9 | 16.9 | -0.08 | 23.0 | 23.4 | -0.01 |
| Gastroesophageal reflux disease               | 14.9 | 18.3 | -0.09 | 24.8 | 25.6 | -0.02 |
| Gastrointestinal hemorrhage                   | 3.6  | 3.5  | 0.01  | 6.0  | 5.9  | 0.00  |
| Human immunodeficiency virus infection        | 1.0  | 0.8  | 0.02  | 1.9  | 1.6  | 0.02  |
| Hyperlipidemia                                | 24.8 | 36.0 | -0.25 | 37.5 | 39.5 | -0.04 |
| Hypertensive disorder                         | 34.0 | 40.8 | -0.14 | 52.1 | 54.5 | -0.05 |
| Lesion of liver                               | 1.6  | 1.5  | 0.01  | 3.1  | 2.7  | 0.02  |
| Obesity                                       | 13.2 | 15.1 | -0.06 | 21.3 | 22.1 | -0.02 |
| Osteoarthritis                                | 15.2 | 21.3 | -0.16 | 25.7 | 26.6 | -0.02 |
| Pneumonia                                     | 3.7  | 4.0  | -0.02 | 6.1  | 5.8  | 0.01  |
| Psoriasis                                     | 0.6  | 1.0  | -0.04 | 1.0  | 1.1  | -0.01 |
| Renal impairment                              | 6.5  | 8.7  | -0.08 | 12.7 | 12.6 | 0.00  |
| Rheumatoid arthritis                          | 1.1  | 1.7  | -0.06 | 2.2  | 2.1  | 0.01  |
| Schizophrenia                                 | 0.8  | 0.3  | 0.07  | 1.6  | 1.4  | 0.01  |
| Ulcerative colitis                            | 0.3  | 0.5  | -0.03 | 0.5  | 0.5  | 0.01  |
| Urinary tract infectious disease              | 8.4  | 9.2  | -0.03 | 12.6 | 12.0 | 0.02  |
| Viral hepatitis C                             | 2.3  | 1.0  | 0.10  | 5.0  | 4.2  | 0.04  |
| Visual system disorder                        | 9.9  | 15.0 | -0.16 | 16.6 | 17.9 | -0.03 |
| Medical history: Cardiovascular disease       |      |      |       |      |      |       |
| Atrial fibrillation                           | 2.6  | 5.6  | -0.15 | 4.3  | 4.8  | -0.02 |
| Cerebrovascular disease                       | 2.6  | 4.2  | -0.09 | 3.1  | 3.4  | -0.02 |
| Coronary arteriosclerosis                     | 6.0  | 10.1 | -0.15 | 10.2 | 9.8  | 0.01  |
| Heart disease                                 | 14.2 | 22.5 | -0.21 | 22.0 | 21.8 | 0.00  |
| Heart failure                                 | 3.5  | 4.6  | -0.06 | 6.9  | 6.3  | 0.03  |
| Ischemic heart disease                        | 4.0  | 6.0  | -0.09 | 7.3  | 7.0  | 0.01  |
| Peripheral vascular disease                   | 2.9  | 3.6  | -0.04 | 6.4  | 5.8  | 0.03  |
| Pulmonary embolism                            | 1.0  | 1.0  | 0.00  | 1.6  | 1.7  | -0.01 |
| Venous thrombosis                             | 1.5  | 2.0  | -0.04 | 2.6  | 2.4  | 0.01  |
| Medical history: Neoplasms                    |      |      |       |      |      |       |
| Hematologic neoplasm                          | 0.9  | 2.0  | -0.09 | 2.0  | 2.0  | 0.00  |
| Malignant lymphoma                            | 0.4  | 0.9  | -0.07 | 0.5  | 0.7  | -0.03 |
| Malignant neoplasm of anorectum               | 0.2  | 0.3  | -0.02 | 0.4  | 0.3  | 0.00  |
| Malignant neoplastic disease                  | 6.5  | 11.6 | -0.18 | 11.4 | 11.6 | -0.01 |
| Malignant tumor of breast                     | 1.6  | 2.9  | -0.09 | 2.7  | 2.7  | 0.00  |
| Malignant tumor of colon                      | 0.3  | 0.6  | -0.04 | 0.7  | 0.7  | 0.00  |
| Malignant tumor of urinary bladder            | 0.2  | 0.4  | -0.05 | 0.4  | 0.3  | 0.01  |
| Primary malignant neoplasm of prostate        | 1.1  | 2.0  | -0.07 | 2.1  | 2.3  | -0.01 |
| Medication use                                |      |      |       |      |      |       |
| Agents acting on the renin-angiotensin system | 1.3  | 1.1  | 0.02  | 3.0  | 2.8  | 0.01  |
| Antibacterials for systemic use               | 5.3  | 4.2  | 0.05  | 11.0 | 10.7 | 0.01  |
| Antidepressants                               | 1.5  | 1.0  | 0.04  | 3.2  | 3.2  | 0.00  |
| Antiepileptics                                | 1.7  | 1.2  | 0.05  | 4.0  | 3.6  | 0.03  |

|                                                       |     |     |       |      |      |       |
|-------------------------------------------------------|-----|-----|-------|------|------|-------|
| Antiinflammatory and antirheumatic products           | 5.1 | 3.4 | 0.08  | 10.6 | 10.1 | 0.02  |
| Antineoplastic agents                                 | 0.6 | 1.0 | -0.04 | 1.9  | 1.6  | 0.02  |
| Antithrombotic agents                                 | 3.9 | 3.6 | 0.01  | 8.0  | 7.9  | 0.01  |
| Beta blocking agents                                  | 2.0 | 1.6 | 0.03  | 4.6  | 3.8  | 0.04  |
| Diuretics                                             | 1.4 | 1.1 | 0.03  | 3.1  | 3.5  | -0.02 |
| Drugs for acid related disorders                      | 3.0 | 2.5 | 0.03  | 6.2  | 5.6  | 0.02  |
| Drugs for obstructive airway diseases                 | 4.1 | 3.7 | 0.02  | 8.9  | 8.3  | 0.02  |
| Drugs used in diabetes                                | 0.2 | 0.3 | -0.01 | 0.5  | 0.7  | -0.02 |
| Immunosuppressants                                    | 0.2 | 0.3 | -0.03 | 0.5  | 0.6  | 0.00  |
| Lipid modifying agents                                | 1.8 | 1.6 | 0.02  | 3.5  | 3.7  | -0.01 |
| Opioids                                               | 5.5 | 5.0 | 0.02  | 12.1 | 11.4 | 0.02  |
| Psycholeptics                                         | 5.7 | 4.7 | 0.05  | 11.8 | 11.7 | 0.00  |
| Psychostimulants, agents used for adhd and nootropics | 0.1 | 0.1 | 0.00  | <0.3 | 0.2  | -0.01 |

- Characteristics are based on deep vein thrombosis as the outcome event. Numbers are slightly different for other outcome events, as patients with prior history of that event were excluded from the analysis.

Supplementary Table 8. Summary of diagnostics at the database-target-comparator level.

| DATABASE                    | DIAGNOSTIC        |                            | 1 <sup>st</sup> dose<br>ChAdOx1 vs<br>BNT162b2 | 1 <sup>st</sup> dose<br>ChAdOx1 vs<br>mRNA-1273 | 2 <sup>nd</sup> dose<br>ChAdOx1 vs<br>BNT162b2 | 2 <sup>nd</sup> dose<br>ChAdOx1 vs<br>mRNA-1273 | Ad26.COVS.S<br>vs BNT162b2 | Ad26.COVS.S<br>vs mRNA-1273 |
|-----------------------------|-------------------|----------------------------|------------------------------------------------|-------------------------------------------------|------------------------------------------------|-------------------------------------------------|----------------------------|-----------------------------|
| <b>UK CPRD</b>              |                   |                            |                                                |                                                 |                                                |                                                 |                            |                             |
|                             | Covariate balance | SMD<0.1 for all            | ✓                                              | n/a                                             | ✓                                              | n/a                                             | n/a                        | n/a                         |
|                             | Power             | MDRR<5 for 1+ outcomes     | 10                                             | n/a                                             | 9                                              | n/a                                             | n/a                        | n/a                         |
|                             | Systematic error  | <20% associated w exposure | 98.0%                                          | n/a                                             | 94.4%                                          | n/a                                             | n/a                        | n/a                         |
| <b>Spain SIDIAP</b>         |                   |                            |                                                |                                                 |                                                |                                                 |                            |                             |
|                             | Covariate balance | SMD<0.1 for all            | x                                              | x                                               | x                                              | x                                               | ✓                          | n/a                         |
|                             | Power             | 4<5 for 1+ outcomes        |                                                |                                                 |                                                |                                                 | 8                          | n/a                         |
|                             | Systematic error  | <20% associated w exposure |                                                |                                                 |                                                |                                                 | 96.4%                      | n/a                         |
| <b>GERMANY DA</b>           |                   |                            |                                                |                                                 |                                                |                                                 |                            |                             |
|                             | Covariate balance | SMD<0.1 for all            | ✓                                              | x                                               | ✓                                              | x                                               | ✓                          | n/a                         |
|                             | Power             | MDRR<5 for 1+ outcomes     | 7                                              | 0                                               | 0                                              | 0                                               | 1                          | n/a                         |
|                             | Systematic error  | <20% associated w exposure | 84.2%                                          |                                                 | §                                              |                                                 | 70.0%                      | n/a                         |
| <b>FRANCE LPD</b>           |                   |                            |                                                |                                                 |                                                |                                                 |                            |                             |
|                             | Covariate balance | SMD<0.1 for all            | ✓                                              | ✓                                               | x                                              | x                                               | n/a                        | n/a                         |
|                             | Power             | MDRR<5 for 1+ outcomes     | 0                                              | 0                                               | 0                                              | 0                                               | n/a                        | n/a                         |
|                             | Systematic error  | <20% associated w exposure | 83.3%                                          | §                                               |                                                |                                                 | n/a                        | n/a                         |
| <b>Netherlands<br/>IPCI</b> |                   |                            |                                                |                                                 |                                                |                                                 |                            |                             |

|                              |                          |                                      |     |     |     |     |       |       |
|------------------------------|--------------------------|--------------------------------------|-----|-----|-----|-----|-------|-------|
|                              | <b>Covariate balance</b> | <i>SMD&lt;0.1 for all</i>            | ✓   | n/a | ✓   | n/a | ✓     | ✓     |
|                              | <b>Power</b>             | <i>MDRR&lt;5 for 1+ outcomes</i>     | 3   | n/a | 0   | n/a | 0     | 0     |
|                              | <b>Systematic error</b>  | <i>&lt;20% associated w exposure</i> | §   | n/a | §   | n/a | §     | §     |
| <b>IQVIA US OpenClaims</b>   |                          |                                      |     |     |     |     |       |       |
|                              | <b>Covariate balance</b> | <i>SMD&lt;0.1 for all</i>            | n/a | n/a | n/a | n/a | ✓     | ✓     |
|                              | <b>Power</b>             | <i>MDRR&lt;5 for 1+ outcomes</i>     | n/a | n/a | n/a | n/a | 12    | 13    |
|                              | <b>Systematic error</b>  | <i>&lt;20% associated w exposure</i> | n/a | n/a | n/a | n/a | 72.2% | 67.9% |
| <b>IQVIA US HOSPITAL CDM</b> |                          |                                      |     |     |     |     |       |       |
|                              | <b>Covariate balance</b> | <i>SMD&lt;0.1 for all</i>            | n/a | n/a | n/a | n/a | x     | x     |
|                              | <b>Power</b>             | <i>MDRR&lt;5 for 1+ outcomes</i>     | n/a | n/a | n/a | n/a | 0     | 0     |
|                              | <b>Systematic error</b>  | <i>&lt;20% associated w exposure</i> | n/a | n/a | n/a | n/a |       |       |

Grey = Excluded from further analyses; Orange = Included for meta-analysis, underpowered for database-specific effect estimation; Green = Systematic error detected, only calibrated IRRs should be interpreted. §: empirical calibration was not conducted due to insufficient NCOs estimated.

Supplementary Table 9. Crude incidence rate and corresponding 95% confidence intervals, European data

|                                                                                                                      | UK CPRD   |             |        |                                    | Germany DA |             |        |                                    | SIDIAP    |             |        |                                    |
|----------------------------------------------------------------------------------------------------------------------|-----------|-------------|--------|------------------------------------|------------|-------------|--------|------------------------------------|-----------|-------------|--------|------------------------------------|
| Vaccine                                                                                                              | N         | Person-year | Events | IR per 1,000 person-years (95% CI) | N          | Person-year | Events | IR per 1,000 person-years (95% CI) | N         | Person-year | Events | IR per 1,000 person-years (95% CI) |
| <b>Thrombocytopenia</b>                                                                                              |           |             |        |                                    |            |             |        |                                    |           |             |        |                                    |
| ChAdOx1 1st dose                                                                                                     | 3,621,898 | 263,673     | 1,261  | 4.78 (4.52 to 5.05)                | 85,500     | 6,480       | 37     | 5.71 (4.02 to 7.87)                |           |             |        |                                    |
| ChAdOx1 2nd dose                                                                                                     | 1,115,370 | 54,189      | 347    | 6.4 (5.75 to 7.11)                 | 17,426     | 1,219       | <5     |                                    |           |             |        |                                    |
| BNT162b2 1st dose                                                                                                    | 1,724,118 | 130,845     | 641    | 4.9 (4.53 to 5.29)                 | 334,413    | 25,186      | 116    | 4.61 (3.81 to 5.52)                | 1,754,222 | 109,785     | 1,516  | 13.81 (13.12 to 14.52)             |
| BNT162b2 2nd dose                                                                                                    | 1,276,204 | 80,349      | 458    | 5.7 (5.19 to 6.25)                 | 170,133    | 12,124      | 59     | 4.87 (3.7 to 6.28)                 | 1,131,167 |             | 1,242  | 16.45 (15.54 to 17.39)             |
| mRNA -1273 1st dose                                                                                                  |           |             |        |                                    | 614        | 46          | <5     |                                    | 215,405   | 15,527      | 416    | 26.79 (24.28 to 29.49)             |
| mRNA -1273 2nd dose                                                                                                  |           |             |        |                                    | 72         | 5           | 0      | 0 (0 to 694.52)                    | 158,659   | 8,191       | 310    | 37.85 (33.75 to 42.3)              |
| Ad26.COVS.S                                                                                                          |           |             |        |                                    | 17,988     | 1,217       | 13     | 10.68 (5.69 to 18.27)              | 115,521   | 5,434       | 57     | 10.49 (7.94 to 13.59)              |
| <b>Any thrombosis (venous thrombo-embolism or arterial thromboembolism) with thrombocytopenia syndrome (Any-TTS)</b> |           |             |        |                                    |            |             |        |                                    |           |             |        |                                    |
| ChAdOx1 1st dose                                                                                                     | 3,772,477 | 274,860     | 197    | 0.72 (0.62 to 0.82)                |            |             |        |                                    |           |             |        |                                    |
| ChAdOx1 2nd dose                                                                                                     | 1,186,267 | 57,864      | 51     | 0.88 (0.66 to 1.16)                |            |             |        |                                    |           |             |        |                                    |
| BNT162b2 1st dose                                                                                                    | 1,827,767 | 138,755     | 98     | 0.71 (0.57 to 0.86)                |            |             |        |                                    | 1,990,976 | 126,431     | 0      | 0 (0 to 0.03)                      |
| BNT162b2 2nd dose                                                                                                    | 1,358,901 | 85,737      | 68     | 0.79 (0.62 to 1.01)                |            |             |        |                                    | 1,328,942 | 89,897      | 0      | 0 (0 to 0.04)                      |
| mRNA -1273 1st dose                                                                                                  |           |             |        |                                    |            |             |        |                                    | 246,113   | 17,799      | 0      | 0 (0 to 0.21)                      |
| mRNA -1273 2nd dose                                                                                                  |           |             |        |                                    |            |             |        |                                    | 184,804   | 9,891       | 0      | 0 (0 to 0.37)                      |
| Ad26.COVS.S                                                                                                          |           |             |        |                                    |            |             |        |                                    | 126,950   | 6,054       | 0      | 0 (0 to 0.61)                      |
| <b>TTS_ATE</b>                                                                                                       |           |             |        |                                    |            |             |        |                                    |           |             |        |                                    |
| ChAdOx1 1st dose                                                                                                     | 3,788,372 | 276,051     | 7      | 0.03 (0.01 to 0.05)                | 89,691     | 6,799       | 0      | 0 (0 to 0.54)                      |           |             |        |                                    |
| ChAdOx1 2nd dose                                                                                                     | 1,194,498 | 58,293      | <5     |                                    | 18,765     | 1,316       | 0      | 0 (0 to 2.8)                       |           |             |        |                                    |
| BNT162b2 1st dose                                                                                                    | 1,839,463 | 139,647     | 6      | 0.04 (0.02 to 0.09)                | 350,881    | 26,434      | <5     |                                    | 1,987,022 | 126,133     | 80     | 0.63 (0.5 to 0.79)                 |
| BNT162b2 2nd dose                                                                                                    | 1,368,269 | 86,343      | <5     |                                    | 181,708    | 12,971      | 0      | 0 (0 to 0.28)                      | 1,325,147 | 89,614      | 74     | 0.83 (0.65 to 1.04)                |
| mRNA -1273 1st dose                                                                                                  |           |             |        |                                    | 653        | 49          | 0      | 0 (0 to 74.7)                      | 245,696   | 17,768      | 10     | 0.56 (0.27 to 1.03)                |
| mRNA -1273 2nd dose                                                                                                  |           |             |        |                                    | 72         | 5           | 0      | 0 (0 to 694.52)                    | 184,428   | 9,864       | 5      | 0.51 (0.16 to 1.18)                |



|                                                                         |           |         |    |                     |         |        |    |                 |           |         |    |                     |
|-------------------------------------------------------------------------|-----------|---------|----|---------------------|---------|--------|----|-----------------|-----------|---------|----|---------------------|
| Ad26.COVS.S                                                             |           |         |    |                     | 18,757  | 1,271  | 0  | 0 (0 to 2.9)    | 126,844   | 6,048   | <5 |                     |
| <b>TTS_CVST</b>                                                         |           |         |    |                     |         |        |    |                 |           |         |    |                     |
| ChAdOx1 1st dose                                                        | 3,788,833 | 276,086 | <5 |                     | 89,718  | 6,802  | 0  | 0 (0 to 0.54)   |           |         |    |                     |
| ChAdOx1 2nd dose                                                        | 1,194,815 | 58,310  | 0  | 0 (0 to 0.06)       | 18,774  | 1,316  | 0  | 0 (0 to 2.8)    |           |         |    |                     |
| BNT162b2 1st dose                                                       | 1,839,964 | 139,685 | 0  | 0 (0 to 0.03)       | 351,008 | 26,444 | <5 |                 | 1,990,968 | 126,430 | 0  | 0 (0 to 0.03)       |
| BNT162b2 2nd dose                                                       | 1,368,704 | 86,372  | 0  | 0 (0 to 0.04)       | 181,818 | 12,979 | 0  | 0 (0 to 0.28)   | 1,328,935 | 89,897  | 0  | 0 (0 to 0.04)       |
| mR -1273 1st dose                                                       |           |         |    |                     | 653     | 49     | 0  | 0 (0 to 74.7)   | 246,109   | 17,799  | 0  | 0 (0 to 0.21)       |
| mR -1273 2nd dose                                                       |           |         |    |                     | 72      | 5      | 0  | 0 (0 to 694.52) | 184,800   | 9,890   | 0  | 0 (0 to 0.37)       |
| Ad26.COVS.S                                                             |           |         |    |                     | 18,763  | 1,272  | 0  | 0 (0 to 2.9)    | 126,949   | 6,054   | 0  | 0 (0 to 0.61)       |
| <b>Deep vein thrombosis with thrombocytopenia syndrome (TTS-DVT)</b>    |           |         |    |                     |         |        |    |                 |           |         |    |                     |
| ChAdOx1 1st dose                                                        | 3,788,419 | 276,054 | 10 | 0.04 (0.02 to 0.07) | 89,706  | 6,801  | 0  | 0 (0 to 0.54)   |           |         |    |                     |
| ChAdOx1 2nd dose                                                        | 1,194,560 | 58,298  | <5 |                     | 18,770  | 1,316  | 0  | 0 (0 to 2.8)    |           |         |    |                     |
| BNT162b2 1st dose                                                       | 1,839,609 | 139,658 | <5 |                     | 350,943 | 26,439 | <5 |                 | 1,990,183 | 126,371 | 18 | 0.14 (0.08 to 0.23) |
| BNT162b2 2nd dose                                                       | 1,368,413 | 86,353  | 7  | 0.08 (0.03 to 0.17) | 181,768 | 12,976 | <5 |                 | 1,328,197 | 89,842  | 11 | 0.12 (0.06 to 0.22) |
| mRNA -1273 1st dose                                                     |           |         |    |                     | 652     | 49     | 0  | 0 (0 to 74.82)  | 245,907   | 17,784  | 5  | 0.28 (0.09 to 0.66) |
| mRNA -1273 2nd dose                                                     |           |         |    |                     | 72      | 5      | 0  | 0 (0 to 694.52) | 184,624   | 9,878   | 6  | 0.61 (0.22 to 1.32) |
| Ad26.COVS.S                                                             |           |         |    |                     | 18,758  | 1,271  | 0  | 0 (0 to 2.9)    | 126,923   | 6,053   | <5 |                     |
| <b>TTS_ATE</b>                                                          |           |         |    |                     |         |        |    |                 |           |         |    |                     |
| ChAdOx1 1st dose                                                        | 3,788,766 | 276,081 | <5 |                     | 89,704  | 6,800  | 0  | 0 (0 to 0.54)   |           |         |    |                     |
| ChAdOx1 2nd dose                                                        | 1,194,766 | 58,307  | <5 |                     | 18,771  | 1,316  | 0  | 0 (0 to 2.8)    |           |         |    |                     |
| BNT162b2 1st dose                                                       | 1,839,898 | 139,680 | <5 |                     | 350,954 | 26,440 | <5 |                 | 1,988,798 | 126,266 | 41 | 0.32 (0.23 to 0.44) |
| BNT162b2 2nd dose                                                       | 1,368,650 | 86,368  | <5 |                     | 181,769 | 12,976 | 0  | 0 (0 to 0.28)   | 1,326,837 | 89,739  | 39 | 0.43 (0.31 to 0.59) |
| mRNA -1273 1st dose                                                     |           |         |    |                     | 653     | 49     | 0  | 0 (0 to 74.7)   | 245,927   | 17,786  | 5  | 0.28 (0.09 to 0.66) |
| mRNA -1273 2nd dose                                                     |           |         |    |                     | 72      | 5      | 0  | 0 (0 to 694.52) | 184,639   | 9,879   | <5 |                     |
| Ad26.COVS.S                                                             |           |         |    |                     | 18,762  | 1,272  | 0  | 0 (0 to 2.9)    | 126,893   | 6,051   | 0  | 0 (0 to 0.61)       |
| <b>TTS_MI</b>                                                           |           |         |    |                     |         |        |    |                 |           |         |    |                     |
| ChAdOx1 1st dose                                                        | 3,788,454 | 276,057 | <5 |                     | 89,705  | 6,801  | 0  | 0 (0 to 0.54)   |           |         |    |                     |
| ChAdOx1 2nd dose                                                        | 1,194,555 | 58,296  | <5 |                     | 18,768  | 1,316  | 0  | 0 (0 to 2.8)    |           |         |    |                     |
| BNT162b2 1st dose                                                       | 1,839,542 | 139,653 | <5 |                     | 350,932 | 26,438 | 0  | 0 (0 to 0.14)   | 1,989,318 | 126,306 | 36 | 0.29 (0.2 to 0.39)  |
| BNT162b2 2nd dose                                                       | 1,368,336 | 86,347  | <5 |                     | 181,754 | 12,974 | 0  | 0 (0 to 0.28)   | 1,327,361 | 89,781  | 34 | 0.38 (0.26 to 0.53) |
| mRNA -1273 1st dose                                                     |           |         |    |                     | 653     | 49     | 0  | 0 (0 to 74.7)   | 245,917   | 17,785  | <5 |                     |
| mRNA -1273 2nd dose                                                     |           |         |    |                     | 72      | 5      | 0  | 0 (0 to 694.52) | 184,621   | 9,878   | <5 |                     |
| Ad26.COVS.S                                                             |           |         |    |                     | 18,758  | 1,271  | 0  | 0 (0 to 2.9)    | 126,902   | 6,051   | <5 |                     |
| <b>TTS_PE</b>                                                           |           |         |    |                     |         |        |    |                 |           |         |    |                     |
| ChAdOx1 1st dose                                                        | 3,788,598 | 276,068 | 7  | 0.03 (0.01 to 0.05) | 89,698  | 6,800  | <5 |                 |           |         |    |                     |
| ChAdOx1 2nd dose                                                        | 1,194,665 | 58,302  | 0  | 0 (0 to 0.06)       | 18,770  | 1,316  | 0  | 0 (0 to 2.8)    |           |         |    |                     |
| BNT162b2 1st dose                                                       | 1,839,770 | 139,670 | <5 |                     | 350,891 | 26,435 | <5 |                 | 1,990,144 | 126,368 | 28 | 0.22 (0.15 to 0.32) |
| BNT162b2 2nd dose                                                       | 1,368,545 | 86,362  | <5 |                     | 181,732 | 12,973 | <5 |                 | 1,328,162 | 89,839  | 17 | 0.19 (0.11 to 0.3)  |
| mRNA -1273 1st dose                                                     |           |         |    |                     | 651     | 49     | 0  | 0 (0 to 74.94)  | 245,920   | 17,785  | 9  | 0.51 (0.23 to 0.96) |
| mRNA -1273 2nd dose                                                     |           |         |    |                     | 72      | 5      | 0  | 0 (0 to 694.52) | 184,642   | 9,879   | <5 |                     |
| Ad26.COVS.S                                                             |           |         |    |                     | 18,759  | 1,272  | <5 |                 | 126,917   | 6,052   | 0  | 0 (0 to 0.61)       |
| <b>TTS_SVT</b>                                                          |           |         |    |                     |         |        |    |                 |           |         |    |                     |
| ChAdOx1 1st dose                                                        | 3,788,796 | 276,083 | <5 |                     | 89,714  | 6,801  | 0  | 0 (0 to 0.54)   |           |         |    |                     |
| ChAdOx1 2nd dose                                                        | 1,194,797 | 58,309  | 0  | 0 (0 to 0.06)       | 18,772  | 1,316  | 0  | 0 (0 to 2.8)    |           |         |    |                     |
| BNT162b2 1st dose                                                       | 1,839,935 | 139,683 | 0  | 0 (0 to 0.03)       | 350,997 | 26,443 | 0  | 0 (0 to 0.14)   | 1,990,776 | 126,416 | <5 |                     |
| BNT162b2 2nd dose                                                       | 1,368,682 | 86,371  | 0  | 0 (0 to 0.04)       | 181,809 | 12,979 | 0  | 0 (0 to 0.28)   | 1,328,759 | 89,884  | 5  | 0.06 (0.02 to 0.13) |
| mRNA -1273 1st dose                                                     |           |         |    |                     | 653     | 49     | 0  | 0 (0 to 74.7)   | 245,964   | 17,788  | <5 |                     |
| mRNA -1273 2nd dose                                                     |           |         |    |                     | 72      | 5      | 0  | 0 (0 to 694.52) | 184,680   | 9,882   | 0  | 0 (0 to 0.37)       |
| Ad26.COVS.S                                                             |           |         |    |                     | 18,763  | 1,272  | 0  | 0 (0 to 2.9)    | 126,942   | 6,054   | 0  | 0 (0 to 0.61)       |
| <b>Venous thrombo-embolism with thrombocytopenia syndrome (TTS-VTE)</b> |           |         |    |                     |         |        |    |                 |           |         |    |                     |
| ChAdOx1 1st dose                                                        | 3,788,220 | 276,039 | 14 | 0.05 (0.03 to 0.09) | 89,697  | 6,800  | 0  | 0 (0 to 0.54)   |           |         |    |                     |
| ChAdOx1 2nd dose                                                        | 1,194,431 | 58,291  | <5 |                     | 18,767  | 1,316  | 0  | 0 (0 to 2.8)    |           |         |    |                     |

|                                           |           |         |     |                     |         |        |    |                     |           |         |     |                     |
|-------------------------------------------|-----------|---------|-----|---------------------|---------|--------|----|---------------------|-----------|---------|-----|---------------------|
| BNT162b2 1st dose                         | 1,839,448 | 139,646 | 5   | 0.04 (0.01 to 0.08) | 350,877 | 26,434 | <5 |                     | 1,989,653 | 126,332 | 39  | 0.31 (0.22 to 0.42) |
| BNT162b2 2nd dose                         | 1,368,277 | 86,344  | 9   | 0.1 (0.05 to 0.2)   | 181,720 | 12,972 | <5 |                     | 1,327,705 | 89,805  | 25  | 0.28 (0.18 to 0.41) |
| mRNA -1273 1st dose                       |           |         |     |                     | 651     | 49     | 0  | 0 (0 to 74.94)      | 245,790   | 17,775  | 15  | 0.84 (0.47 to 1.39) |
| mRNA -1273 2nd dose                       |           |         |     |                     | 72      | 5      | 0  | 0 (0 to 694.52)     | 184,523   | 9,870   | 9   | 0.91 (0.42 to 1.73) |
| Ad26.COVID.S                              |           |         |     |                     | 18,755  | 1,271  | <5 |                     | 126,901   | 6,051   | <5  |                     |
| <b>Cerebral venous sinus thrombosis</b>   |           |         |     |                     |         |        |    |                     |           |         |     |                     |
| ChAdOx1 1st dose                          | 3,788,249 | 276,041 | 13  | 0.05 (0.03 to 0.08) | 89,711  | 6,801  | <5 |                     |           |         |     |                     |
| ChAdOx1 2nd dose                          | 1,194,604 | 58,300  | <5  |                     | 18,770  | 1,316  | 0  | 0 (0 to 2.8)        |           |         |     |                     |
| BNT162b2 1st dose                         | 1,839,631 | 139,660 | 0   | 0 (0 to 0.03)       | 350,965 | 26,441 | <5 |                     | 1,990,871 | 126,424 | <5  |                     |
| BNT162b2 2nd dose                         | 1,368,495 | 86,361  | 0   | 0 (0 to 0.04)       | 181,790 | 12,977 | 0  | 0 (0 to 0.28)       | 1,328,866 | 89,892  | 0   | 0 (0 to 0.04)       |
| mRNA -1273 1st dose                       |           |         |     |                     | 653     | 49     | 0  | 0 (0 to 74.7)       | 246,081   | 17,797  | 0   | 0 (0 to 0.21)       |
| mRNA -1273 2nd dose                       |           |         |     |                     | 72      | 5      | 0  | 0 (0 to 694.52)     | 184,775   | 9,889   | <5  |                     |
| Ad26.COVID.S                              |           |         |     |                     | 18,762  | 1,272  | <5 |                     | 126,938   | 6,053   | 0   | 0 (0 to 0.61)       |
| <b>Splanchnic and Visceral Thrombosis</b> |           |         |     |                     |         |        |    |                     |           |         |     |                     |
| ChAdOx1 1st dose                          | 3,787,759 | 276,004 | 17  | 0.06 (0.04 to 0.1)  | 89,698  | 6,800  | 0  | 0 (0 to 0.54)       |           |         |     |                     |
| ChAdOx1 2nd dose                          | 1,194,267 | 58,283  | 5   | 0.09 (0.03 to 0.2)  | 18,767  | 1,316  | 0  | 0 (0 to 2.8)        |           |         |     |                     |
| BNT162b2 1st dose                         | 1,839,281 | 139,633 | 5   | 0.04 (0.01 to 0.08) | 350,832 | 26,431 | <5 |                     | 1,989,938 | 126,356 | 15  | 0.12 (0.07 to 0.2)  |
| BNT162b2 2nd dose                         | 1,368,176 | 86,340  | <5  |                     | 181,688 | 12,970 | <5 |                     | 1,328,039 | 89,832  | 14  | 0.16 (0.09 to 0.26) |
| mRNA -1273 1st dose                       |           |         |     |                     | 653     | 49     | 0  | 0 (0 to 74.7)       | 245,579   | 17,760  | 7   | 0.39 (0.16 to 0.81) |
| mRNA -1273 2nd dose                       |           |         |     |                     | 72      | 5      | 0  | 0 (0 to 694.52)     | 184,343   | 9,859   | 6   | 0.61 (0.22 to 1.32) |
| Ad26.COVID.S                              |           |         |     |                     | 18,759  | 1,271  | 0  | 0 (0 to 2.9)        | 126,887   | 6,051   | <5  |                     |
| <b>Deep vein thrombosis (DVT)</b>         |           |         |     |                     |         |        |    |                     |           |         |     |                     |
| ChAdOx1 1st dose                          | 3,741,359 | 272,472 | 335 | 1.23 (1.1 to 1.37)  | 88,463  | 6,706  | 21 | 3.13 (1.94 to 4.79) |           |         |     |                     |
| ChAdOx1 2nd dose                          | 1,169,773 | 57,025  | 86  | 1.51 (1.21 to 1.86) | 18,390  | 1,288  | 0  | 0 (0 to 2.86)       |           |         |     |                     |
| BNT162b2 1st dose                         | 1,804,763 | 136,994 | 236 | 1.72 (1.51 to 1.96) | 344,916 | 25,982 | 33 | 1.27 (0.87 to 1.78) | 1,973,028 | 125,127 | 219 | 1.75 (1.53 to 2)    |
| BNT162b2 2nd dose                         | 1,341,717 | 84,648  | 143 | 1.69 (1.42 to 1.99) | 177,348 | 12,651 | 27 | 2.13 (1.41 to 3.11) | 1,312,985 | 88,727  | 170 | 1.92 (1.64 to 2.23) |
| mRNA -1273 1st dose                       |           |         |     |                     | 634     | 47     | <5 |                     | 243,786   | 17,626  | 36  | 2.04 (1.43 to 2.83) |
| mRNA -1273 2nd dose                       |           |         |     |                     | 71      | 5      | 0  | 0 (0 to 704.69)     | 182,802   | 9,759   | 26  | 2.66 (1.74 to 3.9)  |
| Ad26.COVID.S                              |           |         |     |                     | 18,485  | 1,252  | <5 |                     | 126,189   | 6,012   | 10  | 1.66 (0.8 to 3.06)  |
| <b>Pulmonary embolism</b>                 |           |         |     |                     |         |        |    |                     |           |         |     |                     |
| ChAdOx1 1st dose                          | 3,757,176 | 273,676 | 387 | 1.41 (1.28 to 1.56) | 88,838  | 6,734  | 6  | 0.89 (0.33 to 1.94) |           |         |     |                     |
| ChAdOx1 2nd dose                          | 1,176,965 | 57,391  | 70  | 1.22 (0.95 to 1.54) | 18,500  | 1,296  | <5 |                     |           |         |     |                     |
| BNT162b2 1st dose                         | 1,815,404 | 137,808 | 275 | 2 (1.77 to 2.25)    | 345,384 | 26,017 | 36 | 1.38 (0.97 to 1.92) | 1,978,276 | 125,496 | 177 | 1.41 (1.21 to 1.63) |
| BNT162b2 2nd dose                         | 1,349,726 | 85,156  | 122 | 1.43 (1.19 to 1.71) | 177,597 | 12,667 | 20 | 1.58 (0.96 to 2.44) | 1,317,392 | 89,043  | 131 | 1.47 (1.23 to 1.75) |
| mRNA -1273 1st dose                       |           |         |     |                     | 643     | 48     | 0  | 0 (0 to 75.88)      | 244,418   | 17,674  | 48  | 2.72 (2 to 3.6)     |
| mRNA -1273 2nd dose                       |           |         |     |                     | 71      | 5      | 0  | 0 (0 to 704.69)     | 183,339   | 9,793   | 23  | 2.35 (1.49 to 3.52) |
| Ad26.COVID.S                              |           |         |     |                     | 18,581  | 1,259  | <5 |                     | 126,442   | 6,024   | 5   | 0.83 (0.27 to 1.94) |
| <b>Venous thrombo-embolism (VTE)</b>      |           |         |     |                     |         |        |    |                     |           |         |     |                     |
| ChAdOx1 1st dose                          | 3,715,771 | 270,525 | 656 | 2.42 (2.24 to 2.62) | 87,718  | 6,649  | 25 | 3.76 (2.43 to 5.55) |           |         |     |                     |
| ChAdOx1 2nd dose                          | 1,155,369 | 56,282  | 143 | 2.54 (2.14 to 2.99) | 18,163  | 1,272  | <5 |                     |           |         |     |                     |
| BNT162b2 1st dose                         | 1,784,864 | 135,473 | 462 | 3.41 (3.11 to 3.74) | 340,391 | 25,639 | 59 | 2.3 (1.75 to 2.97)  | 1,964,216 | 124,479 | 358 | 2.88 (2.59 to 3.19) |
| BNT162b2 2nd dose                         | 1,326,295 | 83,658  | 248 | 2.96 (2.61 to 3.36) | 173,977 | 12,401 | 43 | 3.47 (2.51 to 4.67) | 1,304,959 | 88,132  | 273 | 3.1 (2.74 to 3.49)  |
| mRNA -1273 1st dose                       |           |         |     |                     | 629     | 47     | <5 |                     | 242,639   | 17,541  | 79  | 4.5 (3.57 to 5.61)  |
| mRNA -1273 2nd dose                       |           |         |     |                     | 70      | 5      | 0  | 0 (0 to 715.16)     | 181,795   | 9,691   | 42  | 4.33 (3.12 to 5.86) |
| Ad26.COVID.S                              |           |         |     |                     | 18,332  | 1,241  | 8  | 6.45 (2.78 to 12.7) | 125,850   | 5,992   | 14  | 2.34 (1.28 to 3.92) |
| <b>Ischaemic stroke</b>                   |           |         |     |                     |         |        |    |                     |           |         |     |                     |
| ChAdOx1 1st dose                          | 3,776,958 | 275,183 | 95  | 0.35 (0.28 to 0.42) | 88,152  | 6,682  | 13 | 1.95 (1.04 to 3.33) |           |         |     |                     |
| ChAdOx1 2nd dose                          | 1,187,113 | 57,901  | 33  | 0.57 (0.39 to 0.8)  | 18,246  | 1,278  | 0  | 0 (0 to 2.89)       |           |         |     |                     |
| BNT162b2 1st dose                         | 1,829,692 | 138,900 | 118 | 0.85 (0.7 to 1.02)  | 344,214 | 25,927 | 26 | 1 (0.66 to 1.47)    | 1,935,389 | 122,252 | 549 | 4.49 (4.12 to 4.88) |
| BNT162b2 2nd dose                         | 1,360,495 | 85,825  | 52  | 0.61 (0.45 to 0.79) | 176,358 | 12,574 | 8  | 0.64 (0.27 to 1.25) | 1,276,052 | 85,949  | 523 | 6.08 (5.57 to 6.63) |
| mRNA -1273 1st dose                       |           |         |     |                     | 645     | 48     | 0  | 0 (0 to 75.64)      | 242,770   | 17,550  | 39  | 2.22 (1.58 to 3.04) |
| mRNA -1273 2nd dose                       |           |         |     |                     | 71      | 5      | 0  | 0 (0 to 704.69)     | 181,905   | 9,704   | 24  | 2.47 (1.58 to 3.68) |

|                                       |           |         |     |                     |         |        |    |                     |           |         |     |                        |
|---------------------------------------|-----------|---------|-----|---------------------|---------|--------|----|---------------------|-----------|---------|-----|------------------------|
| Ad26.COVS.S                           |           |         |     |                     | 18,433  | 1,248  | <5 |                     | 125,015   | 5,935   | 18  | 3.03 (1.8 to 4.79)     |
| <b>Myocardial infarction</b>          |           |         |     |                     |         |        |    |                     |           |         |     |                        |
| ChAdOx1 1st dose                      | 3,727,073 | 271,378 | 422 | 1.56 (1.41 to 1.71) | 87,339  | 6,620  | 10 | 1.51 (0.72 to 2.78) |           |         |     |                        |
| ChAdOx1 2nd dose                      | 1,155,608 | 56,294  | 85  | 1.51 (1.21 to 1.87) | 17,915  | 1,253  | <5 |                     |           |         |     |                        |
| BNT162b2 1st dose                     | 1,783,357 | 135,356 | 268 | 1.98 (1.75 to 2.23) | 341,848 | 25,748 | 34 | 1.32 (0.91 to 1.85) | 1,956,402 | 123,866 | 289 | 2.33 (2.07 to 2.62)    |
| BNT162b2 2nd dose                     | 1,324,606 | 83,538  | 158 | 1.89 (1.61 to 2.21) | 174,395 | 12,425 | 24 | 1.93 (1.24 to 2.87) | 1,297,110 | 87,586  | 269 | 3.07 (2.72 to 3.46)    |
| mRNA -1273 1st dose                   |           |         |     |                     | 645     | 48     | 0  | 0 (0 to 75.63)      | 242,726   | 17,546  | 30  | 1.71 (1.15 to 2.44)    |
| mRNA -1273 2nd dose                   |           |         |     |                     | 71      | 5      | 0  | 0 (0 to 704.69)     | 181,881   | 9,716   | 21  | 2.16 (1.34 to 3.3)     |
| Ad26.COVS.S                           |           |         |     |                     | 18,277  | 1,236  | <5 |                     | 125,219   | 5,951   | 10  | 1.68 (0.81 to 3.09)    |
| <b>Intestinal infarction</b>          |           |         |     |                     |         |        |    |                     |           |         |     |                        |
| ChAdOx1 1st dose                      | 3,787,035 | 275,950 | 28  | 0.1 (0.07 to 0.15)  | 89,687  | 6,799  | 0  | 0 (0 to 0.54)       |           |         |     |                        |
| ChAdOx1 2nd dose                      | 1,193,764 | 58,255  | 5   | 0.09 (0.03 to 0.2)  | 18,768  | 1,316  | 0  | 0 (0 to 2.8)        |           |         |     |                        |
| BNT162b2 1st dose                     | 1,838,646 | 139,584 | 19  | 0.14 (0.08 to 0.21) | 350,850 | 26,432 | 0  | 0 (0 to 0.14)       | 1,988,290 | 126,231 | 24  | 0.19 (0.12 to 0.28)    |
| BNT162b2 2nd dose                     | 1,367,612 | 86,300  | 10  | 0.12 (0.06 to 0.21) | 181,693 | 12,970 | 0  | 0 (0 to 0.28)       | 1,326,443 | 89,712  | 20  | 0.22 (0.14 to 0.34)    |
| mRNA -1273 1st dose                   |           |         |     |                     | 653     | 49     | 0  | 0 (0 to 74.7)       | 245,853   | 17,780  | <5  |                        |
| mRNA -1273 2nd dose                   |           |         |     |                     | 72      | 5      | 0  | 0 (0 to 694.52)     | 184,577   | 9,875   | 5   | 0.51 (0.16 to 1.18)    |
| Ad26.COVS.S                           |           |         |     |                     | 18,758  | 1,271  | 0  | 0 (0 to 2.9)        | 126,855   | 6,048   | <5  |                        |
| <b>Arterial thromboembolism (ATE)</b> |           |         |     |                     |         |        |    |                     |           |         |     |                        |
| ChAdOx1 1st dose                      | 3,716,038 | 270,539 | 629 | 2.32 (2.15 to 2.51) | 85,890  | 6,509  | 21 | 3.23 (2 to 4.93)    |           |         |     |                        |
| ChAdOx1 2nd dose                      | 1,148,502 | 55,917  | 141 | 2.52 (2.12 to 2.97) | 17,438  | 1,218  | <5 |                     |           |         |     |                        |
| BNT162b2 1st dose                     | 1,773,973 | 134,639 | 451 | 3.35 (3.05 to 3.67) | 335,573 | 25,270 | 63 | 2.49 (1.92 to 3.19) | 1,904,070 | 119,934 | 998 | 8.32 (7.81 to 8.85)    |
| BNT162b2 2nd dose                     | 1,317,134 | 83,041  | 232 | 2.79 (2.45 to 3.18) | 169,391 | 12,055 | 31 | 2.57 (1.75 to 3.65) | 1,247,356 | 83,871  | 918 | 10.95 (10.25 to 11.68) |
| mRNA -1273 1st dose                   |           |         |     |                     | 637     | 48     | 0  | 0 (0 to 76.59)      | 239,599   | 17,313  | 86  | 4.97 (3.97 to 6.13)    |
| mRNA -1273 2nd dose                   |           |         |     |                     | 70      | 5      | 0  | 0 (0 to 715.16)     | 179,168   | 9,542   | 53  | 5.55 (4.16 to 7.27)    |
| Ad26.COVS.S                           |           |         |     |                     | 17,966  | 1,213  | <5 |                     | 123,408   | 5,839   | 34  | 5.82 (4.03 to 8.14)    |

Supplementary Table 10. Crude incidence rate and corresponding 95% confidence intervals, US data

| Vaccine                 | US Hospital CDM |             |        | US Open Claims                     |           |             |        |                                    |
|-------------------------|-----------------|-------------|--------|------------------------------------|-----------|-------------|--------|------------------------------------|
|                         | N               | Person-year | Events | IR per 1,000 person-years (95% CI) | N         | Person-year | Events | IR per 1,000 person-years (95% CI) |
| <b>thrombocytopenia</b> |                 |             |        |                                    |           |             |        |                                    |
| BNT162b2 1st dose       | 240,105         | 15,552      | 135    | 8.68 (7.28 to 10.27)               | 5,285,326 | 376,318     | 1,038  | 2.76 (2.59 to 2.93)                |
| BNT162b2 2nd dose       | 72,551          | 5,182       | 86     | 16.6 (13.27 to 20.5)               | 2,863,353 | 212,064     | 754    | 3.56 (3.31 to 3.82)                |
| mRNA-1273 1st dose      | 61,081          | 4,603       | 25     | 5.43 (3.51 to 8.02)                | 3,923,483 | 298,953     | 946    | 3.16 (2.97 to 3.37)                |
| mRNA-1273 2nd dose      | 19,561          | 1,382       | 25     | 18.08 (11.7 to 26.7)               | 2,189,283 | 165,463     | 642    | 3.88 (3.59 to 4.19)                |
| Ad26.COVS.S             | 1,645           | 114         | 6      | 52.28 (19.18 to 113.78)            | 628,294   | 46,997      | 170    | 3.62 (3.09 to 4.2)                 |
| <b>TTS_any</b>          |                 |             |        |                                    |           |             |        |                                    |
| BNT162b2 1st dose       |                 |             |        |                                    | 5,288,025 | 376,521     | 818    | 2.17 (2.03 to 2.33)                |
| BNT162b2 2nd dose       |                 |             |        |                                    | 2,865,177 | 212,203     | 595    | 2.8 (2.58 to 3.04)                 |
| mRNA-1273 1st dose      |                 |             |        |                                    | 3,925,741 | 299,125     | 750    | 2.51 (2.33 to 2.69)                |
| mRNA-1273 2nd dose      |                 |             |        |                                    | 2,190,856 | 165,583     | 502    | 3.03 (2.77 to 3.31)                |
| Ad26.COVS.S             |                 |             |        |                                    | 628,572   | 47,019      | 146    | 3.11 (2.62 to 3.65)                |
| <b>TTS_ATE</b>          |                 |             |        |                                    |           |             |        |                                    |
| BNT162b2 1st dose       | 247,434         | 16,066      | 12     | 0.75 (0.39 to 1.3)                 | 5,374,657 | 382,956     | 36     | 0.09 (0.07 to 0.13)                |
| BNT162b2 2nd dose       | 76,551          | 5,475       | 6      | 1.1 (0.4 to 2.39)                  | 2,921,124 | 216,416     | 32     | 0.15 (0.1 to 0.21)                 |

|                    |         |        |    |                     |           |         |    |                     |
|--------------------|---------|--------|----|---------------------|-----------|---------|----|---------------------|
| mRNA-1273 1st dose | 62,720  | 4,726  | <5 |                     | 3,999,861 | 304,784 | 41 | 0.13 (0.1 to 0.18)  |
| mRNA-1273 2nd dose | 20,392  | 1,442  | <5 |                     | 2,240,829 | 169,389 | 33 | 0.19 (0.13 to 0.27) |
| Ad26.COVS.S        | 1,712   | 119    | <5 |                     | 639,180   | 47,822  | <5 |                     |
| <b>TTS_CVST</b>    |         |        |    |                     |           |         |    |                     |
| BNT162b2 1st dose  | 247,714 | 16,085 | 0  | 0 (0 to 0.23)       | 5,377,723 | 383,187 | 0  | 0 (0 to 0.01)       |
| BNT162b2 2nd dose  | 76,682  | 5,484  | 0  | 0 (0 to 0.67)       | 2,923,166 | 216,571 | 0  | 0 (0 to 0.02)       |
| mRNA-1273 1st dose | 62,781  | 4,731  | 0  | 0 (0 to 0.78)       | 4,002,519 | 304,987 | 0  | 0 (0 to 0.01)       |
| mRNA-1273 2nd dose | 20,431  | 1,445  | 0  | 0 (0 to 2.55)       | 2,242,605 | 169,524 | 0  | 0 (0 to 0.02)       |
| Ad26.COVS.S        | 1,715   | 119    | 0  | 0 (0 to 30.87)      | 639,538   | 47,849  | <5 |                     |
| <b>TTS_DVT</b>     |         |        |    |                     |           |         |    |                     |
| BNT162b2 1st dose  | 247,507 | 16,070 | 7  | 0.44 (0.18 to 0.9)  | 5,375,843 | 383,046 | 25 | 0.07 (0.04 to 0.1)  |
| BNT162b2 2nd dose  | 76,552  | 5,475  | <5 |                     | 2,921,944 | 216,478 | 15 | 0.07 (0.04 to 0.11) |
| mRNA-1273 1st dose | 62,737  | 4,727  | <5 |                     | 4,001,015 | 304,872 | 20 | 0.07 (0.04 to 0.1)  |
| mRNA-1273 2nd dose | 20,406  | 1,443  | <5 |                     | 2,241,586 | 169,446 | 12 | 0.07 (0.04 to 0.12) |
| Ad26.COVS.S        | 1,715   | 119    | 0  | 0 (0 to 30.87)      | 639,334   | 47,833  | 6  | 0.13 (0.05 to 0.27) |
| <b>TTS_ATE</b>     |         |        |    |                     |           |         |    |                     |
| BNT162b2 1st dose  | 247,611 | 16,078 | <5 |                     | 5,376,277 | 383,078 | 18 | 0.05 (0.03 to 0.07) |
| BNT162b2 2nd dose  | 76,635  | 5,481  | <5 |                     | 2,922,248 | 216,501 | 14 | 0.06 (0.04 to 0.11) |
| mRNA-1273 1st dose | 62,763  | 4,729  | 0  | 0 (0 to 0.78)       | 4,001,310 | 304,894 | 20 | 0.07 (0.04 to 0.1)  |
| mRNA-1273 2nd dose | 20,417  | 1,444  | 0  | 0 (0 to 2.55)       | 2,241,759 | 169,460 | 14 | 0.08 (0.05 to 0.14) |
| Ad26.COVS.S        | 1,715   | 119    | <5 |                     | 639,374   | 47,836  | <5 |                     |
| <b>TTS_MI</b>      |         |        |    |                     |           |         |    |                     |
| BNT162b2 1st dose  | 247,553 | 16,074 | 9  | 0.56 (0.26 to 1.06) | 5,376,066 | 383,062 | 16 | 0.04 (0.02 to 0.07) |
| BNT162b2 2nd dose  | 76,609  | 5,479  | 5  | 0.91 (0.3 to 2.13)  | 2,922,006 | 216,483 | 20 | 0.09 (0.06 to 0.14) |
| mRNA-1273 1st dose | 62,740  | 4,727  | <5 |                     | 4,001,023 | 304,873 | 20 | 0.07 (0.04 to 0.1)  |
| mRNA-1273 2nd dose | 20,408  | 1,443  | <5 |                     | 2,241,633 | 169,450 | 19 | 0.11 (0.07 to 0.18) |
| Ad26.COVS.S        | 1,712   | 119    | <5 |                     | 639,336   | 47,833  | <5 |                     |
| <b>TTS_PE</b>      |         |        |    |                     |           |         |    |                     |
| BNT162b2 1st dose  | 247,545 | 16,072 | <5 |                     | 5,376,230 | 383,074 | 19 | 0.05 (0.03 to 0.08) |
| BNT162b2 2nd dose  | 76,580  | 5,477  | 0  | 0 (0 to 0.67)       | 2,922,111 | 216,491 | 12 | 0.06 (0.03 to 0.1)  |
| mRNA-1273 1st dose | 62,749  | 4,728  | 0  | 0 (0 to 0.78)       | 4,001,176 | 304,884 | 13 | 0.04 (0.02 to 0.07) |
| mRNA-1273 2nd dose | 20,417  | 1,444  | <5 |                     | 2,241,723 | 169,457 | 13 | 0.08 (0.04 to 0.13) |
| Ad26.COVS.S        | 1,713   | 119    | 0  | 0 (0 to 30.9)       | 639,368   | 47,836  | 6  | 0.13 (0.05 to 0.27) |
| <b>TTS_SVT</b>     |         |        |    |                     |           |         |    |                     |
| BNT162b2 1st dose  | 247,668 | 16,081 | <5 |                     | 5,377,449 | 383,166 | <5 |                     |
| BNT162b2 2nd dose  | 76,653  | 5,482  | <5 |                     | 2,922,992 | 216,558 | <5 |                     |
| mRNA-1273 1st dose | 62,772  | 4,730  | 0  | 0 (0 to 0.78)       | 4,002,311 | 304,971 | <5 |                     |
| mRNA-1273 2nd dose | 20,427  | 1,445  | <5 |                     | 2,242,473 | 169,514 | 5  | 0.03 (0.01 to 0.07) |
| Ad26.COVS.S        | 1,714   | 119    | 0  | 0 (0 to 30.89)      | 639,507   | 47,847  | <5 |                     |
| <b>TTS_VTE</b>     |         |        |    |                     |           |         |    |                     |
| BNT162b2 1st dose  | 247,444 | 16,065 | 8  | 0.5 (0.21 to 0.98)  | 5,375,270 | 383,003 | 32 | 0.08 (0.06 to 0.12) |
| BNT162b2 2nd dose  | 76,517  | 5,472  | <5 |                     | 2,921,557 | 216,448 | 16 | 0.07 (0.04 to 0.12) |
| mRNA-1273 1st dose | 62,725  | 4,726  | <5 |                     | 4,000,511 | 304,834 | 23 | 0.08 (0.05 to 0.11) |
| mRNA-1273 2nd dose | 20,402  | 1,443  | <5 |                     | 2,241,261 | 169,422 | 16 | 0.09 (0.05 to 0.15) |
| Ad26.COVS.S        | 1,713   | 119    | 0  | 0 (0 to 30.9)       | 639,270   | 47,828  | 11 | 0.23 (0.11 to 0.41) |

|                                           |         |        |    |                        |           |         |       |                     |
|-------------------------------------------|---------|--------|----|------------------------|-----------|---------|-------|---------------------|
| <b>Cerebral venous sinus thrombosis</b>   |         |        |    |                        |           |         |       |                     |
| BNT162b2 1st dose                         | 247,697 | 16,083 | 0  | 0 (0 to 0.23)          | 5,377,097 | 383,140 | 10    | 0.03 (0.01 to 0.05) |
| BNT162b2 2nd dose                         | 76,675  | 5,484  | 0  | 0 (0 to 0.67)          | 2,922,724 | 216,537 | 9     | 0.04 (0.02 to 0.08) |
| mRNA-1273 1st dose                        | 62,776  | 4,730  | 0  | 0 (0 to 0.78)          | 4,002,042 | 304,950 | 6     | 0.02 (0.01 to 0.04) |
| mRNA-1273 2nd dose                        | 20,428  | 1,445  | <5 |                        | 2,242,315 | 169,502 | <5    |                     |
| Ad26.COVS.S                               | 1,714   | 119    | 0  | 0 (0 to 30.89)         | 639,457   | 47,843  | <5    |                     |
| <b>Splanchnic and Visceral Thrombosis</b> |         |        |    |                        |           |         |       |                     |
| BNT162b2 1st dose                         | 247,470 | 16,067 | <5 |                        | 5,374,280 | 382,930 | 32    | 0.08 (0.06 to 0.12) |
| BNT162b2 2nd dose                         | 76,533  | 5,473  | 5  | 0.91 (0.3 to 2.13)     | 2,920,875 | 216,398 | 21    | 0.1 (0.06 to 0.15)  |
| mRNA-1273 1st dose                        | 62,704  | 4,725  | <5 |                        | 3,999,804 | 304,780 | 42    | 0.14 (0.1 to 0.19)  |
| mRNA-1273 2nd dose                        | 20,394  | 1,442  | <5 |                        | 2,240,723 | 169,381 | 28    | 0.17 (0.11 to 0.24) |
| Ad26.COVS.S                               | 1,713   | 119    | 0  | 0 (0 to 30.91)         | 639,112   | 47,817  | 10    | 0.21 (0.1 to 0.38)  |
| <b>Deep vein thrombosis</b>               |         |        |    |                        |           |         |       |                     |
| BNT162b2 1st dose                         | 243,746 | 15,808 | 45 | 2.85 (2.08 to 3.81)    | 5,288,296 | 376,489 | 787   | 2.09 (1.95 to 2.24) |
| BNT162b2 2nd dose                         | 74,589  | 5,332  | 41 | 7.69 (5.52 to 10.43)   | 2,862,601 | 211,990 | 508   | 2.4 (2.19 to 2.61)  |
| mRNA-1273 1st dose                        | 61,716  | 4,650  | 16 | 3.44 (1.97 to 5.59)    | 3,922,758 | 298,892 | 674   | 2.25 (2.09 to 2.43) |
| mRNA-1273 2nd dose                        | 19,885  | 1,405  | 18 | 12.8 (7.59 to 20.23)   | 2,187,848 | 165,348 | 453   | 2.74 (2.49 to 3)    |
| Ad26.COVS.S                               | 1,680   | 116    | <5 |                        | 628,004   | 46,974  | 121   | 2.58 (2.14 to 3.08) |
| <b>Pulmonary embolism</b>                 |         |        |    |                        |           |         |       |                     |
| BNT162b2 1st dose                         | 244,991 | 15,895 | 36 | 2.26 (1.59 to 3.14)    | 5,324,735 | 379,216 | 598   | 1.58 (1.45 to 1.71) |
| BNT162b2 2nd dose                         | 75,211  | 5,378  | 22 | 4.09 (2.56 to 6.19)    | 2,887,007 | 213,839 | 351   | 1.64 (1.47 to 1.82) |
| mRNA-1273 1st dose                        | 62,104  | 4,679  | 10 | 2.14 (1.02 to 3.93)    | 3,955,656 | 301,407 | 465   | 1.54 (1.41 to 1.69) |
| mRNA-1273 2nd dose                        | 20,064  | 1,418  | 13 | 9.16 (4.88 to 15.67)   | 2,210,655 | 167,087 | 317   | 1.9 (1.69 to 2.12)  |
| Ad26.COVS.S                               | 1,684   | 117    | <5 |                        | 632,835   | 47,339  | 105   | 2.22 (1.81 to 2.69) |
| <b>Venous thrombo-embolism</b>            |         |        |    |                        |           |         |       |                     |
| BNT162b2 1st dose                         | 242,061 | 15,691 | 67 | 4.27 (3.31 to 5.42)    | 5,256,785 | 374,134 | 1,146 | 3.06 (2.89 to 3.25) |
| BNT162b2 2nd dose                         | 73,682  | 5,266  | 52 | 9.87 (7.37 to 12.95)   | 2,841,124 | 210,370 | 726   | 3.45 (3.2 to 3.71)  |
| mRNA-1273 1st dose                        | 61,319  | 4,620  | 22 | 4.76 (2.98 to 7.21)    | 3,895,067 | 296,777 | 971   | 3.27 (3.07 to 3.48) |
| mRNA-1273 2nd dose                        | 19,667  | 1,390  | 25 | 17.99 (11.64 to 26.55) | 2,169,182 | 163,926 | 646   | 3.94 (3.64 to 4.26) |
| Ad26.COVS.S                               | 1,659   | 115    | <5 |                        | 624,003   | 46,670  | 190   | 4.07 (3.51 to 4.69) |
| <b>Ischaemic stroke</b>                   |         |        |    |                        |           |         |       |                     |
| BNT162b2 1st dose                         | 243,522 | 15,794 | 53 | 3.36 (2.51 to 4.39)    | 5,252,695 | 373,795 | 1,213 | 3.25 (3.07 to 3.43) |
| BNT162b2 2nd dose                         | 74,521  | 5,327  | 45 | 8.45 (6.16 to 11.3)    | 2,837,126 | 210,050 | 841   | 4 (3.74 to 4.28)    |
| mRNA-1273 1st dose                        | 61,702  | 4,649  | 19 | 4.09 (2.46 to 6.38)    | 3,889,140 | 296,321 | 1,160 | 3.91 (3.69 to 4.15) |
| mRNA-1273 2nd dose                        | 19,851  | 1,402  | 12 | 8.55 (4.42 to 14.94)   | 2,165,395 | 163,635 | 800   | 4.89 (4.56 to 5.24) |
| Ad26.COVS.S                               | 1,664   | 116    | <5 |                        | 623,397   | 46,622  | 193   | 4.14 (3.58 to 4.77) |
| <b>Myocardial infarction</b>              |         |        |    |                        |           |         |       |                     |
| BNT162b2 1st dose                         | 243,360 | 15,786 | 61 | 3.86 (2.96 to 4.96)    | 5,281,985 | 375,988 | 1,003 | 2.67 (2.51 to 2.84) |
| BNT162b2 2nd dose                         | 74,570  | 5,330  | 48 | 9 (6.64 to 11.94)      | 2,857,066 | 211,557 | 734   | 3.47 (3.22 to 3.73) |
| mRNA-1273 1st dose                        | 61,614  | 4,643  | 23 | 4.95 (3.14 to 7.43)    | 3,909,897 | 297,907 | 1,024 | 3.44 (3.23 to 3.65) |

|                                 |         |        |     |                        |           |         |       |                        |
|---------------------------------|---------|--------|-----|------------------------|-----------|---------|-------|------------------------|
| mRNA-1273 2nd dose              | 19,816  | 1,400  | 22  | 15.7 (9.84 to 23.78)   | 2,178,281 | 164,615 | 691   | 4.2 (3.89 to 4.52)     |
| Ad26.COVS.S                     | 1,672   | 116    | <5  |                        | 625,169   | 46,757  | 168   | 3.59 (3.07 to 4.18)    |
| <b>Intestinal infarction</b>    |         |        |     |                        |           |         |       |                        |
| BNT162b2 1st dose               | 247,266 | 16,053 | <5  |                        | 5,368,328 | 382,481 | 99    | 0.26 (0.21 to 0.32)    |
| BNT162b2 2nd dose               | 76,446  | 5,467  | 7   | 1.28 (0.51 to 2.64)    | 2,916,832 | 216,091 | 70    | 0.32 (0.25 to 0.41)    |
| mRNA-1273 1st dose              | 62,682  | 4,723  | <5  |                        | 3,993,545 | 304,301 | 95    | 0.31 (0.25 to 0.38)    |
| mRNA-1273 2nd dose              | 20,371  | 1,440  | 0   | 0 (0 to 2.56)          | 2,236,418 | 169,052 | 103   | 0.61 (0.5 to 0.74)     |
| Ad26.COVS.S                     | 1,714   | 119    | 0   | 0 (0 to 30.89)         | 638,258   | 47,752  | 7     | 0.15 (0.06 to 0.3)     |
| <b>Arterial thromboembolism</b> |         |        |     |                        |           |         |       |                        |
| BNT162b2 1st dose               | 239,472 | 15,517 | 140 | 9.02 (7.59 to 10.65)   | 5,172,486 | 367,768 | 4,666 | 12.69 (12.33 to 13.06) |
| BNT162b2 2nd dose               | 72,596  | 5,187  | 110 | 21.2 (17.43 to 25.56)  | 2,781,792 | 205,853 | 3,211 | 15.6 (15.06 to 16.15)  |
| mRNA-1273 1st dose              | 60,601  | 4,566  | 54  | 11.83 (8.88 to 15.43)  | 3,810,079 | 290,277 | 4,615 | 15.9 (15.44 to 16.36)  |
| mRNA-1273 2nd dose              | 19,275  | 1,361  | 40  | 29.38 (20.99 to 40.01) | 2,110,385 | 159,437 | 2,926 | 18.35 (17.69 to 19.03) |
| Ad26.COVS.S                     | 1,625   | 113    | <5  |                        | 610,896   | 45,673  | 720   | 15.76 (14.63 to 16.96) |

Supplementary Table 11. Incidence rates before- and after- propensity score matching.

| Database                | Vaccine            | IR pre-matching        | IR after-matching    | Database                     | Vaccine            | IR pre-matching        | IR after-matching      |
|-------------------------|--------------------|------------------------|----------------------|------------------------------|--------------------|------------------------|------------------------|
| <b>Thrombocytopenia</b> |                    |                        |                      | <b>Intestinal infarction</b> |                    |                        |                        |
| CPRD_Aurum              | ChAdOx1 1st dose   | 4.78 (4.52 to 5.05)    | 6.06 (5.65 to 6.48)  | CPRD_Aurum                   | ChAdOx1 1st dose   | 0.1 (0.07 to 0.15)     | 0.15 (0.1 to 0.23)     |
| CPRD_Aurum              | ChAdOx1 2nd dose   | 6.4 (5.75 to 7.11)     | 5.98 (5.23 to 6.8)   | CPRD_Aurum                   | BNT162b2 1st dose  | 0.14 (0.08 to 0.21)    | 0.15 (0.08 to 0.24)    |
| CPRD_Aurum              | BNT162b2 1st dose  | 4.9 (4.53 to 5.29)     | 4.89 (4.45 to 5.37)  | CPRD_Aurum                   | BNT162b2 2nd dose  | 0.12 (0.06 to 0.21)    | 0.12 (0.05 to 0.24)    |
| CPRD_Aurum              | BNT162b2 2nd dose  | 5.7 (5.19 to 6.25)     | 5.75 (5.16 to 6.39)  | US_Open_Claims               | BNT162b2 1st dose  | 0.26 (0.21 to 0.32)    | 0.3 (0.23 to 0.4)      |
| France_LPD              | ChAdOx1 1st dose   | 3.7 (1.49 to 7.62)     | 4.56 (1.48 to 10.63) | US_Open_Claims               | mRNA-1273 1st dose | 0.31 (0.25 to 0.38)    | 0.31 (0.24 to 0.41)    |
| Germany_DA              | ChAdOx1 1st dose   | 5.71 (4.02 to 7.87)    | 5.61 (3.91 to 7.81)  | US_Open_Claims               | Ad26.COVS.S        | 0.15 (0.06 to 0.3)     | 0.15 (0.06 to 0.3)     |
| Germany_DA              | BNT162b2 1st dose  | 4.61 (3.81 to 5.52)    | 5.03 (3.97 to 6.27)  | <b>ATE</b>                   |                    |                        |                        |
| Germany_DA              | BNT162b2 2nd dose  | 4.87 (3.7 to 6.28)     | 2.8 (1.4 to 5.02)    | CPRD_Aurum                   | ChAdOx1 1st dose   | 2.32 (2.15 to 2.51)    | 2.97 (2.69 to 3.27)    |
| Germany_DA              | Ad26.COVS.S        | 10.68 (5.69 to 18.27)  | 9.89 (5.11 to 17.28) | CPRD_Aurum                   | ChAdOx1 2nd dose   | 2.52 (2.12 to 2.97)    | 2.54 (2.07 to 3.09)    |
| IPCI                    | BNT162b2 1st dose  | 3.07 (2.2 to 4.16)     | 3.2 (1.6 to 5.73)    | CPRD_Aurum                   | BNT162b2 1st dose  | 3.35 (3.05 to 3.67)    | 3.57 (3.19 to 3.97)    |
| SIDIAP                  | BNT162b2 1st dose  | 13.81 (13.12 to 14.52) | 9.88 (8.55 to 11.36) | CPRD_Aurum                   | BNT162b2 2nd dose  | 2.79 (2.45 to 3.18)    | 2.46 (2.08 to 2.88)    |
| SIDIAP                  | Ad26.COVS.S        | 10.49 (7.94 to 13.59)  | 9.73 (7.2 to 12.86)  | Germany_DA                   | ChAdOx1 1st dose   | 3.23 (2 to 4.93)       | 3.03 (1.83 to 4.74)    |
| US_Open_Claims          | BNT162b2 1st dose  | 2.76 (2.59 to 2.93)    | 2.72 (2.48 to 2.98)  | Germany_DA                   | BNT162b2 1st dose  | 2.49 (1.92 to 3.19)    | 2.83 (2.06 to 3.8)     |
| US_Open_Claims          | mRNA-1273 1st dose | 3.16 (2.97 to 3.37)    | 2.85 (2.6 to 3.12)   | Germany_DA                   | BNT162b2 2nd dose  | 2.57 (1.75 to 3.65)    | 1.79 (0.72 to 3.69)    |
| US_Open_Claims          | Ad26.COVS.S        | 3.62 (3.09 to 4.2)     | 3.62 (3.09 to 4.2)   | IPCI                         | ChAdOx1 1st dose   | 4.28 (2.68 to 6.48)    | 3.23 (1.05 to 7.53)    |
| <b>TTS_any</b>          |                    |                        |                      | IPCI                         | BNT162b2 1st dose  | 5.49 (4.3 to 6.92)     | 5.34 (3.16 to 8.44)    |
| CPRD_Aurum              | ChAdOx1 1st dose   | 0.72 (0.62 to 0.82)    | 0.84 (0.7 to 1)      | IPCI                         | BNT162b2 2nd dose  | 6.35 (4.26 to 9.13)    | 4.24 (1.55 to 9.22)    |
| CPRD_Aurum              | ChAdOx1 2nd dose   | 0.88 (0.66 to 1.16)    | 0.93 (0.65 to 1.27)  | SIDIAP                       | BNT162b2 1st dose  | 8.32 (7.81 to 8.85)    | 5.55 (4.6 to 6.65)     |
| CPRD_Aurum              | BNT162b2 1st dose  | 0.71 (0.57 to 0.86)    | 0.67 (0.52 to 0.86)  | SIDIAP                       | Ad26.COVS.S        | 5.82 (4.03 to 8.14)    | 6.27 (4.34 to 8.76)    |
| CPRD_Aurum              | BNT162b2 2nd dose  | 0.79 (0.62 to 1.01)    | 0.65 (0.47 to 0.88)  | US_Open_Claims               | BNT162b2 1st dose  | 12.69 (12.33 to 13.06) | 13.26 (12.72 to 13.83) |
| US_Open_Claims          | BNT162b2 1st dose  | 2.17 (2.03 to 2.33)    | 2.19 (1.97 to 2.42)  | US_Open_Claims               | mRNA-1273 1st dose | 15.9 (15.44 to 16.37)  | 13.6 (13.04 to 14.17)  |
| US_Open_Claims          | mRNA-1273 1st dose | 2.51 (2.33 to 2.69)    | 2.24 (2.02 to 2.47)  | US_Open_Claims               | Ad26.COVS.S        | 15.76 (14.63 to 16.96) | 15.76 (14.63 to 16.96) |
| US_Open_Claims          | Ad26.COVS.S        | 3.11 (2.62 to 3.65)    | 3.11 (2.62 to 3.65)  | <b>SVT</b>                   |                    |                        |                        |
| <b>TTS_ATE</b>          |                    |                        |                      | CPRD_Aurum_202106            | ChAdOx1 1st dose   | 0.06 (0.04 to 0.1)     | 0.1 (0.05 to 0.16)     |

|                        |                    |                     |                     |                |                    |                     |                      |
|------------------------|--------------------|---------------------|---------------------|----------------|--------------------|---------------------|----------------------|
| CPRD_Aurum             | ChAdOx1 1st dose   | 0.03 (0.01 to 0.05) | 0.03 (0.01 to 0.08) | US_Open_Claims | BNT162b2 1st dose  | 0.08 (0.06 to 0.12) | 0.11 (0.07 to 0.17)  |
| US_Open_Claims         | BNT162b2 1st dose  | 0.09 (0.07 to 0.13) | 0.09 (0.05 to 0.15) | US_Open_Claims | mRNA-1273 1st dose | 0.14 (0.1 to 0.19)  | 0.1 (0.06 to 0.16)   |
| US_Open_Claims         | mRNA-1273 1st dose | 0.13 (0.1 to 0.18)  | 0.14 (0.09 to 0.21) | US_Open_Claims | Ad26.COVS2.S       | 0.21 (0.1 to 0.38)  | 0.21 (0.1 to 0.38)   |
| <b>TTS_DVT</b>         |                    |                     |                     | <b>CVST</b>    |                    |                     |                      |
| CPRD_Aurum             | BNT162b2 2nd dose  | 0.08 (0.03 to 0.17) | 0.08 (0.03 to 0.18) | US_Open_Claims | BNT162b2 1st dose  | 0.03 (0.01 to 0.05) | 0.03 (0.01 to 0.07)  |
| US_Open_Claims         | BNT162b2 1st dose  | 0.07 (0.04 to 0.1)  | 0.06 (0.03 to 0.1)  | <b>DVT</b>     |                    |                     |                      |
| US_Open_Claims         | mRNA-1273 1st dose | 0.07 (0.04 to 0.1)  | 0.07 (0.04 to 0.12) | CPRD_Aurum     | ChAdOx1 1st dose   | 1.23 (1.1 to 1.37)  | 1.36 (1.17 to 1.56)  |
| US_Open_Claims         | Ad26.COVS2.S       | 0.13 (0.05 to 0.27) | 0.13 (0.05 to 0.27) | CPRD_Aurum     | ChAdOx1 2nd dose   | 1.51 (1.21 to 1.86) | 1.51 (1.15 to 1.93)  |
| <b>TTS_isc stroke</b>  |                    |                     |                     | CPRD_Aurum     | BNT162b2 1st dose  | 1.72 (1.51 to 1.96) | 1.59 (1.35 to 1.87)  |
| US_Open_Claims         | BNT162b2 1st dose  | 0.05 (0.03 to 0.07) | 0.05 (0.02 to 0.09) | CPRD_Aurum     | BNT162b2 2nd dose  | 1.69 (1.42 to 1.99) | 1.51 (1.23 to 1.85)  |
| US_Open_Claims         | mRNA-1273 1st dose | 0.07 (0.04 to 0.1)  | 0.06 (0.03 to 0.11) | Germany_DA     | ChAdOx1 1st dose   | 3.13 (1.94 to 4.79) | 3.25 (2.01 to 4.97)  |
| <b>TTS_MI</b>          |                    |                     |                     | Germany_DA     | BNT162b2 1st dose  | 1.27 (0.87 to 1.78) | 1.31 (0.81 to 2)     |
| US_Open_Claims         | BNT162b2 1st dose  | 0.04 (0.02 to 0.07) | 0.05 (0.02 to 0.09) | IPCI           | BNT162b2 1st dose  | 1.48 (0.91 to 2.29) | 1.44 (0.47 to 3.36)  |
| US_Open_Claims         | mRNA-1273 1st dose | 0.07 (0.04 to 0.1)  | 0.08 (0.04 to 0.14) | SIDIAP         | BNT162b2 1st dose  | 1.75 (1.53 to 2)    | 1.5 (1.03 to 2.1)    |
| <b>TTS_PE</b>          |                    |                     |                     | SIDIAP         | Ad26.COVS2.S       | 1.66 (0.8 to 3.06)  | 1.79 (0.86 to 3.29)  |
| CPRD_Aurum             | ChAdOx1 1st dose   | 0.03 (0.01 to 0.05) | 0.03 (0.01 to 0.08) | US_Open_Claims | BNT162b2 1st dose  | 2.09 (1.95 to 2.24) | 2.01 (1.8 to 2.23)   |
| US_Open_Claims         | BNT162b2 1st dose  | 0.05 (0.03 to 0.08) | 0.05 (0.02 to 0.09) | US_Open_Claims | mRNA-1273 1st dose | 2.25 (2.09 to 2.43) | 1.98 (1.77 to 2.2)   |
| US_Open_Claims         | mRNA-1273 1st dose | 0.04 (0.02 to 0.07) | 0.04 (0.02 to 0.08) | US_Open_Claims | Ad26.COVS2.S       | 2.58 (2.14 to 3.08) | 2.58 (2.14 to 3.08)  |
| US_Open_Claims         | Ad26.COVS2.S       | 0.13 (0.05 to 0.27) | 0.13 (0.05 to 0.27) | <b>PE</b>      |                    |                     |                      |
| <b>TTS_VTE</b>         |                    |                     |                     | CPRD_Aurum     | ChAdOx1 1st dose   | 1.41 (1.28 to 1.56) | 1.88 (1.66 to 2.12)  |
| CPRD_Aurum             | ChAdOx1 1st dose   | 0.05 (0.03 to 0.09) | 0.05 (0.02 to 0.1)  | CPRD_Aurum     | ChAdOx1 2nd dose   | 1.22 (0.95 to 1.54) | 1.3 (0.97 to 1.7)    |
| CPRD_Aurum             | BNT162b2 2nd dose  | 0.1 (0.05 to 0.2)   | 0.09 (0.03 to 0.2)  | CPRD_Aurum     | BNT162b2 1st dose  | 2 (1.77 to 2.25)    | 2.08 (1.8 to 2.39)   |
| US_Open_Claims         | BNT162b2 1st dose  | 0.08 (0.06 to 0.12) | 0.07 (0.04 to 0.13) | CPRD_Aurum     | BNT162b2 2nd dose  | 1.43 (1.19 to 1.71) | 1.44 (1.16 to 1.77)  |
| US_Open_Claims         | mRNA-1273 1st dose | 0.08 (0.05 to 0.11) | 0.08 (0.04 to 0.14) | Germany_DA     | ChAdOx1 1st dose   | 0.89 (0.33 to 1.94) | 0.93 (0.34 to 2.02)  |
| US_Open_Claims         | Ad26.COVS2.S       | 0.23 (0.11 to 0.41) | 0.23 (0.11 to 0.41) | Germany_DA     | BNT162b2 1st dose  | 1.38 (0.97 to 1.92) | 1.24 (0.76 to 1.92)  |
| <b>Ischemic stroke</b> |                    |                     |                     | Germany_DA     | BNT162b2 2nd dose  | 1.58 (0.96 to 2.44) | 2.17 (0.99 to 4.13)  |
| CPRD_Aurum             | ChAdOx1 1st dose   | 0.35 (0.28 to 0.42) | 0.52 (0.41 to 0.65) | IPCI           | BNT162b2 1st dose  | 1.78 (1.14 to 2.65) | 1.73 (0.63 to 3.76)  |
| CPRD_Aurum             | ChAdOx1 2nd dose   | 0.57 (0.39 to 0.8)  | 0.56 (0.35 to 0.84) | SIDIAP         | BNT162b2 1st dose  | 1.41 (1.21 to 1.63) | 0.63 (0.35 to 1.06)  |
| CPRD_Aurum             | BNT162b2 1st dose  | 0.85 (0.7 to 1.02)  | 0.79 (0.63 to 0.99) | SIDIAP         | Ad26.COVS2.S       | 0.83 (0.27 to 1.94) | 0.89 (0.29 to 2.09)  |
| CPRD_Aurum             | BNT162b2 2nd dose  | 0.61 (0.45 to 0.79) | 0.43 (0.29 to 0.63) | US_Open_Claims | BNT162b2 1st dose  | 1.58 (1.45 to 1.71) | 1.44 (1.26 to 1.63)  |
| Germany_DA             | ChAdOx1 1st dose   | 1.95 (1.04 to 3.33) | 1.71 (0.85 to 3.06) | US_Open_Claims | mRNA-1273 1st dose | 1.54 (1.41 to 1.69) | 1.33 (1.16 to 1.51)  |
| Germany_DA             | BNT162b2 1st dose  | 1 (0.66 to 1.47)    | 0.94 (0.53 to 1.55) | US_Open_Claims | Ad26.COVS2.S       | 2.22 (1.81 to 2.69) | 2.22 (1.81 to 2.69)  |
| SIDIAP                 | BNT162b2 1st dose  | 4.49 (4.12 to 4.88) | 2.8 (2.15 to 3.6)   | <b>VTE</b>     |                    |                     |                      |
| SIDIAP                 | Ad26.COVS2.S       | 3.03 (1.8 to 4.79)  | 3.27 (1.94 to 5.16) | CPRD_Aurum     | ChAdOx1 1st dose   | 2.42 (2.24 to 2.62) | 2.98 (2.7 to 3.28)   |
| US_Open_Claims         | BNT162b2 1st dose  | 3.25 (3.07 to 3.44) | 3.15 (2.89 to 3.43) | CPRD_Aurum     | ChAdOx1 2nd dose   | 2.54 (2.14 to 2.99) | 2.63 (2.15 to 3.18)  |
| US_Open_Claims         | mRNA-1273 1st dose | 3.92 (3.7 to 4.15)  | 3.16 (2.9 to 3.44)  | CPRD_Aurum     | BNT162b2 1st dose  | 3.41 (3.11 to 3.74) | 3.37 (3 to 3.76)     |
| US_Open_Claims         | Ad26.COVS2.S       | 4.14 (3.58 to 4.77) | 4.14 (3.58 to 4.77) | CPRD_Aurum     | BNT162b2 2nd dose  | 2.96 (2.61 to 3.36) | 2.85 (2.45 to 3.3)   |
| <b>MI</b>              |                    |                     |                     | Germany_DA     | ChAdOx1 1st dose   | 3.76 (2.43 to 5.55) | 3.91 (2.53 to 5.77)  |
| CPRD_Aurum             | ChAdOx1 1st dose   | 1.56 (1.41 to 1.71) | 2.01 (1.78 to 2.26) | Germany_DA     | BNT162b2 1st dose  | 2.3 (1.75 to 2.97)  | 2.52 (1.8 to 3.43)   |
| CPRD_Aurum             | ChAdOx1 2nd dose   | 1.51 (1.21 to 1.87) | 1.53 (1.17 to 1.96) | Germany_DA     | BNT162b2 2nd dose  | 3.47 (2.51 to 4.67) | 3.93 (2.25 to 6.38)  |
| CPRD_Aurum             | BNT162b2 1st dose  | 1.98 (1.75 to 2.23) | 2.15 (1.87 to 2.47) | Germany_DA     | Ad26.COVS2.S       | 6.45 (2.78 to 12.7) | 6.47 (2.79 to 12.74) |
| CPRD_Aurum             | BNT162b2 2nd dose  | 1.89 (1.61 to 2.21) | 1.74 (1.43 to 2.1)  | IPCI           | ChAdOx1 1st dose   | 3.82 (2.33 to 5.9)  | 3.81 (1.4 to 8.29)   |
| Germany_DA             | ChAdOx1 1st dose   | 1.51 (0.72 to 2.78) | 1.57 (0.75 to 2.89) | IPCI           | BNT162b2 1st dose  | 2.99 (2.14 to 4.07) | 3.2 (1.6 to 5.72)    |
| Germany_DA             | BNT162b2 1st dose  | 1.32 (0.91 to 1.85) | 1.64 (1.07 to 2.4)  | IPCI           | BNT162b2 2nd dose  | 2.99 (1.63 to 5.01) | 4.16 (1.53 to 9.05)  |
| IPCI                   | BNT162b2 1st dose  | 3.1 (2.22 to 4.2)   | 2.64 (1.21 to 5.01) | SIDIAP         | BNT162b2 1st dose  | 2.88 (2.59 to 3.19) | 1.91 (1.38 to 2.59)  |
| IPCI                   | BNT162b2 2nd dose  | 3.46 (1.98 to 5.62) | 3.49 (1.13 to 8.15) | SIDIAP         | Ad26.COVS2.S       | 2.34 (1.28 to 3.92) | 2.52 (1.38 to 4.22)  |
| SIDIAP                 | BNT162b2 1st dose  | 2.33 (2.07 to 2.62) | 1.74 (1.23 to 2.39) | US_Open_Claims | BNT162b2 1st dose  | 3.06 (2.89 to 3.25) | 2.95 (2.7 to 3.22)   |
| SIDIAP                 | Ad26.COVS2.S       | 1.68 (0.81 to 3.09) | 1.81 (0.87 to 3.33) | US_Open_Claims | mRNA-1273 1st dose | 3.27 (3.07 to 3.48) | 2.9 (2.64 to 3.16)   |
| US_Open_Claims         | BNT162b2 1st dose  | 2.67 (2.5 to 2.84)  | 2.74 (2.5 to 3)     | US_Open_Claims | Ad26.COVS2.S       | 4.07 (3.51 to 4.69) | 4.07 (3.51 to 4.69)  |
| US_Open_Claims         | mRNA-1273 1st dose | 3.44 (3.23 to 3.65) | 3.03 (2.78 to 3.31) |                |                    |                     |                      |
| US_Open_Claims         | Ad26.COVS2.S       | 3.59 (3.07 to 4.18) | 3.59 (3.07 to 4.18) |                |                    |                     |                      |

Supplementary Table 12. Age and sex stratified incidence rate ratio, CPRD UK.

| Target vs. Comparator                     | Subgroup           | MDRR | IRR                 | calibrated IRR             | NCO eligibility |
|-------------------------------------------|--------------------|------|---------------------|----------------------------|-----------------|
| <b>CPRD_Aurum_202106</b>                  |                    |      |                     |                            |                 |
| <b>ATE</b>                                |                    |      |                     |                            |                 |
| ChAdOx1 vs. BNT162b2 1st dose             | age group: 40 - 49 | 3.92 | 1.22 (0.48 to 3.53) | 1.59 (0.62 to 4.13)        | 1               |
| ChAdOx1 vs. BNT162b2 1st dose             | age group: 50 - 59 | 1.82 | 0.57 (0.38 to 0.86) | 0.69 (0.46 to 1.05)        | 1               |
| ChAdOx1 vs. BNT162b2 1st dose             | age group: 60 - 69 | 1.51 | 0.75 (0.57 to 1)    | 0.84 (0.57 to 1.24)        | 1               |
| ChAdOx1 vs. BNT162b2 1st dose             | age group: 70 - 79 | 1.44 | 0.74 (0.58 to 0.95) | 0.95 (0.73 to 1.22)        | 1               |
| ChAdOx1 vs. BNT162b2 1st dose             | age group: 80 - 89 | 1.64 | 0.86 (0.6 to 1.22)  | 0.84 (0.58 to 1.23)        | 1               |
| ChAdOx1 vs. BNT162b2 1st dose             | gender = MALE      | 1.31 | 0.66 (0.55 to 0.79) | <b>0.75 (0.61 to 0.92)</b> | 1               |
| ChAdOx1 vs. BNT162b2 1st dose             | gender = FEMALE    | 1.41 | 0.79 (0.63 to 1.01) | 0.97 (0.76 to 1.23)        | 1               |
| ChAdOx1 vs. BNT162b2 2 <sup>nd</sup> dose | age group: 70 - 79 | 1.72 | 1.24 (0.85 to 1.81) | 1.12 (0.75 to 1.67)        | 1               |
| ChAdOx1 vs. BNT162b2 2 <sup>nd</sup> dose | age group: 80 - 89 | 2    | 1.28 (0.79 to 2.02) | 1.07 (0.62 to 1.86)        | 1               |
| ChAdOx1 vs. BNT162b2 2 <sup>nd</sup> dose | gender = MALE      | 1.63 | 1.32 (0.94 to 1.84) | 1.11 (0.78 to 1.58)        | 1               |
| ChAdOx1 vs. BNT162b2 2 <sup>nd</sup> dose | gender = FEMALE    | 1.74 | 1.3 (0.88 to 1.9)   | 0.96 (0.64 to 1.46)        | 1               |
| <b>DVT</b>                                |                    |      |                     |                            |                 |
| ChAdOx1 vs. BNT162b2 1st dose             | age group: 40 - 49 | 3.93 | 0.55 (0.22 to 1.4)  | 0.72 (0.28 to 1.82)        | 1               |
| ChAdOx1 vs. BNT162b2 1st dose             | age group: 50 - 59 | 2.2  | 0.54 (0.32 to 0.93) | 0.66 (0.38 to 1.14)        | 1               |
| ChAdOx1 vs. BNT162b2 1st dose             | age group: 60 - 69 | 2.02 | 0.78 (0.49 to 1.28) | 0.88 (0.51 to 1.5)         | 1               |
| ChAdOx1 vs. BNT162b2 1st dose             | age group: 70 - 79 | 1.71 | 0.71 (0.49 to 1.03) | 0.91 (0.62 to 1.31)        | 1               |
| ChAdOx1 vs. BNT162b2 1st dose             | age group: 80 - 89 | 2.05 | 1.14 (0.69 to 1.91) | 1.11 (0.66 to 1.87)        | 1               |
| ChAdOx1 vs. BNT162b2 1st dose             | gender = MALE      | 1.53 | 0.76 (0.57 to 1.02) | 0.87 (0.64 to 1.18)        | 1               |
| ChAdOx1 vs. BNT162b2 1st dose             | gender = FEMALE    | 1.6  | 0.7 (0.51 to 0.97)  | 0.86 (0.62 to 1.19)        | 1               |
| ChAdOx1 vs. BNT162b2 2 <sup>nd</sup> dose | age group: 70 - 79 | 2.17 | 1.12 (0.64 to 1.9)  | 1.01 (0.57 to 1.79)        | 1               |
| ChAdOx1 vs. BNT162b2 2 <sup>nd</sup> dose | age group: 80 - 89 | 2.45 | 1.21 (0.64 to 2.21) | 1.01 (0.5 to 2.02)         | 1               |
| ChAdOx1 vs. BNT162b2 2 <sup>nd</sup> dose | gender = MALE      | 2.01 | 1.41 (0.87 to 2.27) | 1.19 (0.73 to 1.95)        | 1               |
| ChAdOx1 vs. BNT162b2 2 <sup>nd</sup> dose | gender = FEMALE    | 1.85 | 1.06 (0.67 to 1.63) | 0.78 (0.49 to 1.26)        | 1               |
| <b>Intestinal infarction</b>              |                    |      |                     |                            |                 |
| ChAdOx1 vs. BNT162b2 1st dose             | gender = MALE      | 4.34 | 0.82 (0.29 to 2.37) | 0.93 (0.33 to 2.65)        | 1               |
| ChAdOx1 vs. BNT162b2 1st dose             | gender = FEMALE    | 3.89 | 0.78 (0.32 to 2.09) | 0.95 (0.39 to 2.31)        | 1               |
| <b>Ischemic stroke</b>                    |                    |      |                     |                            |                 |
| ChAdOx1 vs. BNT162b2 1st dose             | age group: 50 - 59 | 4.37 | 0.62 (0.24 to 1.74) | 0.75 (0.28 to 2)           | 1               |
| ChAdOx1 vs. BNT162b2 1st dose             | age group: 60 - 69 | 2.78 | 0.62 (0.32 to 1.25) | 0.7 (0.34 to 1.44)         | 1               |
| ChAdOx1 vs. BNT162b2 1st dose             | age group: 70 - 79 | 2.12 | 0.55 (0.33 to 0.91) | 0.7 (0.42 to 1.16)         | 1               |
| ChAdOx1 vs. BNT162b2 1st dose             | age group: 80 - 89 | 3    | 0.9 (0.39 to 1.93)  | 0.88 (0.37 to 2.07)        | 1               |
| ChAdOx1 vs. BNT162b2 1st dose             | gender = MALE      | 1.97 | 0.47 (0.3 to 0.75)  | <b>0.54 (0.34 to 0.87)</b> | 1               |
| ChAdOx1 vs. BNT162b2 1st dose             | gender = FEMALE    | 1.94 | 0.65 (0.42 to 1.03) | 0.8 (0.51 to 1.25)         | 1               |
| ChAdOx1 vs. BNT162b2 2 <sup>nd</sup> dose | age group: 70 - 79 | 3.4  | 1.61 (0.68 to 4)    | 1.45 (0.6 to 3.49)         | 1               |
| ChAdOx1 vs. BNT162b2 2 <sup>nd</sup> dose | age group: 80 - 89 | 3.66 | 1.21 (0.47 to 2.96) | 1.01 (0.38 to 2.72)        | 1               |
| ChAdOx1 vs. BNT162b2 2 <sup>nd</sup> dose | gender = MALE      | 2.91 | 1.61 (0.76 to 3.37) | 1.36 (0.64 to 2.88)        | 1               |
| ChAdOx1 vs. BNT162b2 2 <sup>nd</sup> dose | gender = FEMALE    | 3.47 | 1.35 (0.55 to 3.15) | 1 (0.4 to 2.47)            | 1               |
| <b>MI</b>                                 |                    |      |                     |                            |                 |
| ChAdOx1 vs. BNT162b2 1st dose             | age group: 50 - 59 | 2.16 | 0.55 (0.33 to 0.94) | 0.67 (0.39 to 1.14)        | 1               |



|                                           |                    |      |                     |                            |   |
|-------------------------------------------|--------------------|------|---------------------|----------------------------|---|
| ChAdOx1 vs. BNT162b2 1st dose             | age group: 60 - 69 | 1.67 | 0.82 (0.58 to 1.18) | 0.92 (0.59 to 1.43)        | 1 |
| ChAdOx1 vs. BNT162b2 1st dose             | age group: 70 - 79 | 1.59 | 0.83 (0.61 to 1.14) | 1.06 (0.77 to 1.45)        | 1 |
| ChAdOx1 vs. BNT162b2 1st dose             | age group: 80 - 89 | 1.85 | 0.95 (0.62 to 1.47) | 0.93 (0.59 to 1.46)        | 1 |
| ChAdOx1 vs. BNT162b2 1st dose             | gender = MALE      | 1.4  | 0.75 (0.6 to 0.95)  | 0.86 (0.67 to 1.1)         | 1 |
| ChAdOx1 vs. BNT162b2 1st dose             | gender = FEMALE    | 1.55 | 0.84 (0.62 to 1.13) | 1.02 (0.75 to 1.38)        | 1 |
| ChAdOx1 vs. BNT162b2 2 <sup>nd</sup> dose | age group: 70 - 79 | 1.93 | 1.04 (0.65 to 1.66) | 0.94 (0.58 to 1.54)        | 1 |
| ChAdOx1 vs. BNT162b2 2 <sup>nd</sup> dose | age group: 80 - 89 | 2.46 | 1.4 (0.75 to 2.47)  | 1.17 (0.59 to 2.29)        | 1 |
| ChAdOx1 vs. BNT162b2 2 <sup>nd</sup> dose | gender = MALE      | 1.8  | 1.19 (0.78 to 1.79) | 1 (0.65 to 1.54)           | 1 |
| ChAdOx1 vs. BNT162b2 2 <sup>nd</sup> dose | gender = FEMALE    | 2    | 1.15 (0.7 to 1.85)  | 0.85 (0.5 to 1.44)         | 1 |
| <b>PE</b>                                 |                    |      |                     |                            |   |
| ChAdOx1 vs. BNT162b2 1st dose             | age group: 40 - 49 | 3.39 | 0.59 (0.25 to 1.36) | 0.77 (0.33 to 1.82)        | 1 |
| ChAdOx1 vs. BNT162b2 1st dose             | age group: 50 - 59 | 2.64 | 0.84 (0.44 to 1.69) | 1.02 (0.54 to 1.95)        | 1 |
| ChAdOx1 vs. BNT162b2 1st dose             | age group: 60 - 69 | 1.82 | 0.66 (0.44 to 0.99) | 0.73 (0.46 to 1.18)        | 1 |
| ChAdOx1 vs. BNT162b2 1st dose             | age group: 70 - 79 | 1.54 | 0.86 (0.64 to 1.16) | 1.1 (0.81 to 1.48)         | 1 |
| ChAdOx1 vs. BNT162b2 1st dose             | age group: 80 - 89 | 1.81 | 1.09 (0.72 to 1.67) | 1.07 (0.69 to 1.65)        | 1 |
| ChAdOx1 vs. BNT162b2 1st dose             | gender = MALE      | 1.48 | 0.76 (0.58 to 1)    | 0.87 (0.65 to 1.15)        | 1 |
| ChAdOx1 vs. BNT162b2 1st dose             | gender = FEMALE    | 1.45 | 0.79 (0.62 to 1.03) | 0.97 (0.75 to 1.26)        | 1 |
| ChAdOx1 vs. BNT162b2 2 <sup>nd</sup> dose | age group: 70 - 79 | 2.14 | 1.12 (0.66 to 1.93) | 1.01 (0.58 to 1.75)        | 1 |
| ChAdOx1 vs. BNT162b2 2 <sup>nd</sup> dose | age group: 80 - 89 | 2.35 | 0.73 (0.36 to 1.37) | 0.61 (0.28 to 1.31)        | 1 |
| ChAdOx1 vs. BNT162b2 2 <sup>nd</sup> dose | gender = MALE      | 2.02 | 1.43 (0.87 to 2.32) | 1.2 (0.73 to 1.98)         | 1 |
| ChAdOx1 vs. BNT162b2 2 <sup>nd</sup> dose | gender = FEMALE    | 1.94 | 0.9 (0.54 to 1.45)  | 0.66 (0.39 to 1.13)        | 1 |
| <b>Thrombocytopenia</b>                   |                    |      |                     |                            |   |
| ChAdOx1 vs. BNT162b2 1st dose             | age group: 30 - 39 | 2.31 | 1.21 (0.67 to 2.29) | 1.61 (0.74 to 3.48)        | 1 |
| ChAdOx1 vs. BNT162b2 1st dose             | age group: 40 - 49 | 1.86 | 1.39 (0.9 to 2.19)  | <b>1.82 (1.15 to 2.88)</b> | 1 |
| ChAdOx1 vs. BNT162b2 1st dose             | age group: 50 - 59 | 1.6  | 0.87 (0.63 to 1.2)  | 1.05 (0.75 to 1.47)        | 1 |
| ChAdOx1 vs. BNT162b2 1st dose             | age group: 60 - 69 | 1.46 | 1.04 (0.8 to 1.36)  | 1.16 (0.8 to 1.69)         | 1 |
| ChAdOx1 vs. BNT162b2 1st dose             | age group: 70 - 79 | 1.34 | 1.09 (0.89 to 1.34) | <b>1.39 (1.12 to 1.73)</b> | 1 |
| ChAdOx1 vs. BNT162b2 1st dose             | age group: 80 - 89 | 1.47 | 1.22 (0.93 to 1.6)  | 1.19 (0.88 to 1.6)         | 1 |
| ChAdOx1 vs. BNT162b2 1st dose             | gender = MALE      | 1.24 | 0.98 (0.85 to 1.14) | 1.12 (0.94 to 1.34)        | 1 |
| ChAdOx1 vs. BNT162b2 1st dose             | gender = FEMALE    | 1.29 | 1.23 (1.02 to 1.47) | <b>1.49 (1.23 to 1.81)</b> | 1 |
| ChAdOx1 vs. BNT162b2 2 <sup>nd</sup> dose | age group: 70 - 79 | 1.48 | 1.15 (0.87 to 1.51) | 1.03 (0.77 to 1.39)        | 1 |
| ChAdOx1 vs. BNT162b2 2 <sup>nd</sup> dose | age group: 80 - 89 | 1.58 | 1 (0.72 to 1.37)    | 0.83 (0.54 to 1.28)        | 1 |
| ChAdOx1 vs. BNT162b2 2 <sup>nd</sup> dose | gender = MALE      | 1.37 | 1.04 (0.83 to 1.3)  | 0.88 (0.69 to 1.12)        | 1 |
| ChAdOx1 vs. BNT162b2 2 <sup>nd</sup> dose | gender = FEMALE    | 1.45 | 1.44 (1.12 to 1.85) | 1.06 (0.79 to 1.42)        | 1 |
| <b>TTS_any</b>                            |                    |      |                     |                            |   |
| ChAdOx1 vs. BNT162b2 1st dose             | age group: 40 - 49 | 4.27 | 1.55 (0.55 to 4.72) | 2.03 (0.71 to 5.77)        | 1 |
| ChAdOx1 vs. BNT162b2 1st dose             | age group: 50 - 59 | 3.43 | 1.28 (0.53 to 3.39) | 1.55 (0.64 to 3.72)        | 1 |
| ChAdOx1 vs. BNT162b2 1st dose             | age group: 60 - 69 | 2.59 | 0.96 (0.5 to 1.93)  | 1.07 (0.53 to 2.15)        | 1 |
| ChAdOx1 vs. BNT162b2 1st dose             | age group: 70 - 79 | 2.23 | 1.05 (0.6 to 1.91)  | 1.34 (0.77 to 2.34)        | 1 |
| ChAdOx1 vs. BNT162b2 1st dose             | age group: 80 - 89 | 3    | 1.08 (0.49 to 2.39) | 1.05 (0.48 to 2.32)        | 1 |
| ChAdOx1 vs. BNT162b2 1st dose             | gender = MALE      | 1.8  | 1.24 (0.82 to 1.92) | 1.41 (0.92 to 2.17)        | 1 |
| ChAdOx1 vs. BNT162b2 1st dose             | gender = FEMALE    | 1.89 | 0.87 (0.56 to 1.35) | 1.05 (0.68 to 1.63)        | 1 |
| ChAdOx1 vs. BNT162b2 2 <sup>nd</sup> dose | age group: 70 - 79 | 2.55 | 1.36 (0.7 to 2.74)  | 1.23 (0.63 to 2.41)        | 1 |

|                                           |                    |      |                     |                     |   |
|-------------------------------------------|--------------------|------|---------------------|---------------------|---|
| ChAdOx1 vs. BNT162b2 2 <sup>nd</sup> dose | age group: 80 - 89 | 3.43 | 1.22 (0.49 to 2.8)  | 1.02 (0.39 to 2.65) | 1 |
| ChAdOx1 vs. BNT162b2 2 <sup>nd</sup> dose | gender = MALE      | 2.33 | 1.4 (0.78 to 2.49)  | 1.18 (0.65 to 2.14) | 1 |
| ChAdOx1 vs. BNT162b2 2 <sup>nd</sup> dose | gender = FEMALE    | 2.68 | 1.58 (0.79 to 3.18) | 1.17 (0.58 to 2.37) | 1 |
| <b>VTE</b>                                |                    |      |                     |                     |   |
| ChAdOx1 vs. BNT162b2 1st dose             | age group: 30 - 39 | 3.81 | 1.04 (0.41 to 2.82) | 1.38 (0.48 to 3.93) | 1 |
| ChAdOx1 vs. BNT162b2 1st dose             | age group: 40 - 49 | 2.66 | 0.57 (0.3 to 1.1)   | 0.75 (0.39 to 1.45) | 1 |
| ChAdOx1 vs. BNT162b2 1st dose             | age group: 50 - 59 | 1.93 | 0.56 (0.36 to 0.87) | 0.68 (0.44 to 1.05) | 1 |
| ChAdOx1 vs. BNT162b2 1st dose             | age group: 60 - 69 | 1.61 | 0.72 (0.53 to 1)    | 0.81 (0.53 to 1.23) | 1 |
| ChAdOx1 vs. BNT162b2 1st dose             | age group: 70 - 79 | 1.42 | 0.8 (0.63 to 1.01)  | 1.01 (0.79 to 1.3)  | 1 |
| ChAdOx1 vs. BNT162b2 1st dose             | age group: 80 - 89 | 1.62 | 1.13 (0.81 to 1.59) | 1.11 (0.77 to 1.59) | 1 |
| ChAdOx1 vs. BNT162b2 1st dose             | gender = MALE      | 1.36 | 0.77 (0.63 to 0.95) | 0.88 (0.7 to 1.11)  | 1 |
| ChAdOx1 vs. BNT162b2 1st dose             | gender = FEMALE    | 1.35 | 0.75 (0.61 to 0.93) | 0.92 (0.74 to 1.14) | 1 |
| ChAdOx1 vs. BNT162b2 2 <sup>nd</sup> dose | age group: 70 - 79 | 1.74 | 1.08 (0.73 to 1.59) | 0.97 (0.64 to 1.47) | 1 |
| ChAdOx1 vs. BNT162b2 2 <sup>nd</sup> dose | age group: 80 - 89 | 1.88 | 0.9 (0.56 to 1.41)  | 0.75 (0.44 to 1.3)  | 1 |
| ChAdOx1 vs. BNT162b2 2 <sup>nd</sup> dose | gender = MALE      | 1.66 | 1.41 (0.99 to 1.99) | 1.19 (0.82 to 1.71) | 1 |
| ChAdOx1 vs. BNT162b2 2 <sup>nd</sup> dose | gender = FEMALE    | 1.6  | 0.92 (0.65 to 1.29) | 0.68 (0.47 to 1)    | 1 |

Supplementary Table 13. Age and sex stratified incidence rate ratio, US Open Claims.

| Target vs. Comparator             | Subgroup           | MDRR | IRR                  | calibrated IRR             | NCO eligibility |
|-----------------------------------|--------------------|------|----------------------|----------------------------|-----------------|
| <b>US_Open_Claims</b>             |                    |      |                      |                            |                 |
| <b>ATE</b>                        |                    |      |                      |                            |                 |
| Ad26.CO2.S vs. BNT162b2 1st dose  | age group: 20 - 29 | 3.95 | 5.89 (2.78 to 12.82) | <b>4.64 (2.16 to 9.97)</b> | 1               |
| Ad26.CO2.S vs. BNT162b2 1st dose  | age group: 30 - 39 | 2.7  | 1.77 (0.95 to 3.12)  | 1.21 (0.56 to 2.6)         | 1               |
| Ad26.CO2.S vs. BNT162b2 1st dose  | age group: 40 - 49 | 1.74 | 1.26 (0.87 to 1.79)  | 0.74 (0.26 to 2.09)        | 0               |
| Ad26.CO2.S vs. BNT162b2 1st dose  | age group: 50 - 59 | 1.35 | 1.51 (1.24 to 1.82)  | 1.07 (0.52 to 2.19)        | 0               |
| Ad26.CO2.S vs. BNT162b2 1st dose  | age group: 60 - 69 | 1.23 | 1.01 (0.87 to 1.17)  | 0.84 (0.5 to 1.43)         | 1               |
| Ad26.CO2.S vs. BNT162b2 1st dose  | age group: 70 - 79 | 1.28 | 0.98 (0.83 to 1.16)  | 0.64 (0.3 to 1.39)         | 0               |
| Ad26.CO2.S vs. BNT162b2 1st dose  | age group: 80 - 89 | 1.35 | 0.75 (0.59 to 0.94)  | <b>0.58 (0.36 to 0.95)</b> | 1               |
| Ad26.CO2.S vs. BNT162b2 1st dose  | gender = MALE      | 1.17 | 1.23 (1.11 to 1.37)  | 0.93 (0.58 to 1.5)         | 0               |
| Ad26.CO2.S vs. BNT162b2 1st dose  | gender = FEMALE    | 1.22 | 1.04 (0.9 to 1.19)   | 0.8 (0.48 to 1.34)         | 0               |
| Ad26.CO2.S vs. mRNA-1273 1st dose | age group: 20 - 29 | 3.9  | 6.01 (2.8 to 13.43)  | <b>5.1 (1.71 to 15.19)</b> | 1               |
| Ad26.CO2.S vs. mRNA-1273 1st dose | age group: 30 - 39 | 2.34 | 1.16 (0.63 to 2.01)  | 0.64 (0.34 to 1.2)         | 1               |
| Ad26.CO2.S vs. mRNA-1273 1st dose | age group: 40 - 49 | 1.64 | 0.95 (0.66 to 1.34)  | 0.51 (0.18 to 1.4)         | 0               |
| Ad26.CO2.S vs. mRNA-1273 1st dose | age group: 50 - 59 | 1.32 | 1.21 (1 to 1.45)     | 0.83 (0.41 to 1.67)        | 0               |
| Ad26.CO2.S vs. mRNA-1273 1st dose | age group: 60 - 69 | 1.25 | 1.19 (1.02 to 1.38)  | 0.98 (0.81 to 1.19)        | 1               |
| Ad26.CO2.S vs. mRNA-1273 1st dose | age group: 70 - 79 | 1.28 | 1.11 (0.93 to 1.31)  | 0.66 (0.3 to 1.46)         | 0               |
| Ad26.CO2.S vs. mRNA-1273 1st dose | age group: 80 - 89 | 1.39 | 1.03 (0.81 to 1.29)  | 0.77 (0.27 to 2.21)        | 0               |
| Ad26.CO2.S vs. mRNA-1273 1st dose | gender = MALE      | 1.18 | 1.42 (1.27 to 1.58)  | 0.96 (0.64 to 1.45)        | 0               |
| Ad26.CO2.S vs. mRNA-1273 1st dose | gender = FEMALE    | 1.21 | 0.88 (0.77 to 1.01)  | 0.63 (0.35 to 1.12)        | 0               |
| <b>DVT</b>                        |                    |      |                      |                            |                 |
| Ad26.CO2.S vs. BNT162b2 1st dose  | age group: 40 - 49 | 2.76 | 1.49 (0.76 to 2.75)  | 0.87 (0.27 to 2.85)        | 0               |
| Ad26.CO2.S vs. BNT162b2 1st dose  | age group: 50 - 59 | 2.02 | 0.99 (0.59 to 1.59)  | 0.7 (0.29 to 1.67)         | 0               |

|                                    |                    |      |                     |                     |   |
|------------------------------------|--------------------|------|---------------------|---------------------|---|
| Ad26.COV2.S vs. BNT162b2 1st dose  | age group: 60 - 69 | 1.68 | 1.17 (0.81 to 1.64) | 0.97 (0.52 to 1.82) | 1 |
| Ad26.COV2.S vs. BNT162b2 1st dose  | age group: 70 - 79 | 2.03 | 1.27 (0.78 to 2.01) | 0.83 (0.34 to 2.05) | 0 |
| Ad26.COV2.S vs. BNT162b2 1st dose  | age group: 80 - 89 | 2.49 | 1.13 (0.58 to 2.06) | 0.87 (0.4 to 1.91)  | 1 |
| Ad26.COV2.S vs. BNT162b2 1st dose  | gender = MALE      | 1.58 | 1.37 (1.02 to 1.83) | 1.04 (0.6 to 1.8)   | 0 |
| Ad26.COV2.S vs. BNT162b2 1st dose  | gender = FEMALE    | 1.55 | 1.13 (0.84 to 1.51) | 0.87 (0.49 to 1.56) | 0 |
| Ad26.COV2.S vs. mRNA-1273 1st dose | age group: 40 - 49 | 3.13 | 2.1 (1.02 to 4.17)  | 1.12 (0.34 to 3.7)  | 0 |
| Ad26.COV2.S vs. mRNA-1273 1st dose | age group: 50 - 59 | 2.09 | 1.16 (0.68 to 1.87) | 0.79 (0.34 to 1.87) | 0 |
| Ad26.COV2.S vs. mRNA-1273 1st dose | age group: 60 - 69 | 1.73 | 1.4 (0.97 to 1.98)  | 1.15 (0.78 to 1.69) | 1 |
| Ad26.COV2.S vs. mRNA-1273 1st dose | age group: 70 - 79 | 1.95 | 1.1 (0.68 to 1.71)  | 0.65 (0.26 to 1.62) | 0 |
| Ad26.COV2.S vs. mRNA-1273 1st dose | age group: 80 - 89 | 2.43 | 1.11 (0.58 to 2)    | 0.83 (0.25 to 2.8)  | 0 |
| Ad26.COV2.S vs. mRNA-1273 1st dose | gender = MALE      | 1.54 | 1.22 (0.91 to 1.63) | 0.83 (0.5 to 1.36)  | 0 |
| Ad26.COV2.S vs. mRNA-1273 1st dose | gender = FEMALE    | 1.59 | 1.37 (1.01 to 1.84) | 0.99 (0.52 to 1.87) | 0 |
| <b>Intestinal infarction</b>       |                    |      |                     |                     |   |
| Ad26.COV2.S vs. BNT162b2 1st dose  | gender = MALE      | 3.49 | 0.95 (0.35 to 2.17) | 0.72 (0.24 to 2.16) | 0 |
| Ad26.COV2.S vs. mRNA-1273 1st dose | gender = MALE      | 3.18 | 0.68 (0.25 to 1.58) | 0.46 (0.16 to 1.36) | 0 |
| <b>Ischemic stroke</b>             |                    |      |                     |                     |   |
| Ad26.COV2.S vs. BNT162b2 1st dose  | age group: 30 - 39 | 4.62 | 2.43 (0.97 to 5.56) | 1.66 (0.6 to 4.58)  | 1 |
| Ad26.COV2.S vs. BNT162b2 1st dose  | age group: 40 - 49 | 2.55 | 2.22 (1.27 to 3.78) | 1.3 (0.42 to 4)     | 0 |
| Ad26.COV2.S vs. BNT162b2 1st dose  | age group: 50 - 59 | 1.81 | 1.57 (1.07 to 2.27) | 1.11 (0.5 to 2.46)  | 0 |
| Ad26.COV2.S vs. BNT162b2 1st dose  | age group: 60 - 69 | 1.57 | 1.09 (0.79 to 1.47) | 0.91 (0.5 to 1.66)  | 1 |
| Ad26.COV2.S vs. BNT162b2 1st dose  | age group: 70 - 79 | 1.64 | 0.97 (0.67 to 1.35) | 0.63 (0.27 to 1.46) | 0 |
| Ad26.COV2.S vs. BNT162b2 1st dose  | age group: 80 - 89 | 1.87 | 1.14 (0.73 to 1.72) | 0.88 (0.48 to 1.63) | 1 |
| Ad26.COV2.S vs. BNT162b2 1st dose  | gender = MALE      | 1.42 | 1.38 (1.09 to 1.72) | 1.04 (0.62 to 1.75) | 0 |
| Ad26.COV2.S vs. BNT162b2 1st dose  | gender = FEMALE    | 1.43 | 1.2 (0.94 to 1.52)  | 0.93 (0.53 to 1.61) | 0 |
| Ad26.COV2.S vs. mRNA-1273 1st dose | age group: 30 - 39 | 4.55 | 2.45 (0.96 to 5.87) | 1.34 (0.52 to 3.48) | 1 |
| Ad26.COV2.S vs. mRNA-1273 1st dose | age group: 40 - 49 | 2.44 | 1.95 (1.11 to 3.31) | 1.04 (0.34 to 3.12) | 0 |
| Ad26.COV2.S vs. mRNA-1273 1st dose | age group: 50 - 59 | 1.83 | 1.62 (1.09 to 2.36) | 1.11 (0.51 to 2.42) | 0 |
| Ad26.COV2.S vs. mRNA-1273 1st dose | age group: 60 - 69 | 1.6  | 1.23 (0.89 to 1.66) | 1.01 (0.72 to 1.42) | 1 |
| Ad26.COV2.S vs. mRNA-1273 1st dose | age group: 70 - 79 | 1.63 | 0.96 (0.67 to 1.35) | 0.57 (0.24 to 1.35) | 0 |
| Ad26.COV2.S vs. mRNA-1273 1st dose | age group: 80 - 89 | 1.84 | 1.09 (0.71 to 1.63) | 0.82 (0.27 to 2.49) | 0 |
| Ad26.COV2.S vs. mRNA-1273 1st dose | gender = MALE      | 1.43 | 1.48 (1.17 to 1.85) | 1 (0.63 to 1.58)    | 0 |
| Ad26.COV2.S vs. mRNA-1273 1st dose | gender = FEMALE    | 1.42 | 1.15 (0.9 to 1.45)  | 0.82 (0.45 to 1.51) | 0 |
| <b>MI</b>                          |                    |      |                     |                     |   |
| Ad26.COV2.S vs. BNT162b2 1st dose  | age group: 40 - 49 | 2.81 | 0.95 (0.43 to 1.89) | 0.55 (0.16 to 1.96) | 0 |
| Ad26.COV2.S vs. BNT162b2 1st dose  | age group: 50 - 59 | 1.84 | 1.21 (0.79 to 1.79) | 0.85 (0.38 to 1.92) | 0 |
| Ad26.COV2.S vs. BNT162b2 1st dose  | age group: 60 - 69 | 1.62 | 1.55 (1.14 to 2.09) | 1.3 (0.72 to 2.36)  | 1 |
| Ad26.COV2.S vs. BNT162b2 1st dose  | age group: 70 - 79 | 1.68 | 0.86 (0.58 to 1.24) | 0.56 (0.24 to 1.31) | 0 |
| Ad26.COV2.S vs. BNT162b2 1st dose  | age group: 80 - 89 | 1.88 | 0.95 (0.6 to 1.47)  | 0.74 (0.39 to 1.39) | 1 |
| Ad26.COV2.S vs. BNT162b2 1st dose  | gender = MALE      | 1.41 | 1.23 (0.98 to 1.54) | 0.93 (0.55 to 1.57) | 0 |
| Ad26.COV2.S vs. BNT162b2 1st dose  | gender = FEMALE    | 1.54 | 1.37 (1.03 to 1.79) | 1.05 (0.6 to 1.86)  | 0 |
| Ad26.COV2.S vs. mRNA-1273 1st dose | age group: 40 - 49 | 2.51 | 0.72 (0.33 to 1.42) | 0.38 (0.11 to 1.32) | 0 |
| Ad26.COV2.S vs. mRNA-1273 1st dose | age group: 50 - 59 | 1.86 | 1.33 (0.87 to 1.98) | 0.91 (0.41 to 2.03) | 0 |
| Ad26.COV2.S vs. mRNA-1273 1st dose | age group: 60 - 69 | 1.57 | 1.31 (0.96 to 1.75) | 1.07 (0.77 to 1.49) | 1 |

|                                    |                    |      |                     |                     |   |
|------------------------------------|--------------------|------|---------------------|---------------------|---|
| Ad26.COV2.S vs. mRNA-1273 1st dose | age group: 70 - 79 | 1.74 | 1.11 (0.75 to 1.6)  | 0.66 (0.28 to 1.58) | 0 |
| Ad26.COV2.S vs. mRNA-1273 1st dose | age group: 80 - 89 | 1.95 | 1.19 (0.75 to 1.82) | 0.89 (0.29 to 2.74) | 0 |
| Ad26.COV2.S vs. mRNA-1273 1st dose | gender = MALE      | 1.41 | 1.27 (1.01 to 1.59) | 0.86 (0.54 to 1.36) | 0 |
| Ad26.COV2.S vs. mRNA-1273 1st dose | gender = FEMALE    | 1.49 | 1.15 (0.87 to 1.5)  | 0.82 (0.44 to 1.54) | 0 |
| <b>PE</b>                          |                    |      |                     |                     |   |
| Ad26.COV2.S vs. BNT162b2 1st dose  | age group: 30 - 39 | 3.69 | 2.06 (0.91 to 4.36) | 1.41 (0.56 to 3.56) | 1 |
| Ad26.COV2.S vs. BNT162b2 1st dose  | age group: 40 - 49 | 3.08 | 1.8 (0.88 to 3.46)  | 1.05 (0.31 to 3.53) | 0 |
| Ad26.COV2.S vs. BNT162b2 1st dose  | age group: 50 - 59 | 2.21 | 1.7 (1.02 to 2.74)  | 1.2 (0.51 to 2.83)  | 0 |
| Ad26.COV2.S vs. BNT162b2 1st dose  | age group: 60 - 69 | 2.04 | 0.95 (0.56 to 1.54) | 0.79 (0.38 to 1.66) | 1 |
| Ad26.COV2.S vs. BNT162b2 1st dose  | age group: 70 - 79 | 2.08 | 1.74 (1.08 to 2.75) | 1.14 (0.47 to 2.77) | 0 |
| Ad26.COV2.S vs. BNT162b2 1st dose  | age group: 80 - 89 | 3.47 | 1.52 (0.65 to 3.3)  | 1.18 (0.46 to 3.06) | 1 |
| Ad26.COV2.S vs. BNT162b2 1st dose  | gender = MALE      | 1.68 | 1.45 (1.04 to 2)    | 1.1 (0.62 to 1.95)  | 0 |
| Ad26.COV2.S vs. BNT162b2 1st dose  | gender = FEMALE    | 1.65 | 1.53 (1.1 to 2.08)  | 1.18 (0.65 to 2.13) | 0 |
| Ad26.COV2.S vs. mRNA-1273 1st dose | age group: 30 - 39 | 4.14 | 2.86 (1.2 to 6.7)   | 1.57 (0.65 to 3.81) | 1 |
| Ad26.COV2.S vs. mRNA-1273 1st dose | age group: 40 - 49 | 3.26 | 2 (0.93 to 4.19)    | 1.07 (0.31 to 3.62) | 0 |
| Ad26.COV2.S vs. mRNA-1273 1st dose | age group: 50 - 59 | 2.15 | 1.56 (0.94 to 2.5)  | 1.07 (0.46 to 2.48) | 0 |
| Ad26.COV2.S vs. mRNA-1273 1st dose | age group: 60 - 69 | 2.08 | 1.07 (0.63 to 1.74) | 0.88 (0.51 to 1.52) | 1 |
| Ad26.COV2.S vs. mRNA-1273 1st dose | age group: 70 - 79 | 2.21 | 2.27 (1.36 to 3.76) | 1.35 (0.53 to 3.42) | 0 |
| Ad26.COV2.S vs. mRNA-1273 1st dose | age group: 80 - 89 | 3.45 | 1.68 (0.75 to 3.36) | 1.26 (0.34 to 4.63) | 0 |
| Ad26.COV2.S vs. mRNA-1273 1st dose | gender = MALE      | 1.69 | 1.52 (1.08 to 2.11) | 1.03 (0.61 to 1.73) | 0 |
| Ad26.COV2.S vs. mRNA-1273 1st dose | gender = FEMALE    | 1.68 | 1.72 (1.24 to 2.36) | 1.24 (0.65 to 2.36) | 0 |
| <b>Thrombocytopenia</b>            |                    |      |                     |                     |   |
| Ad26.COV2.S vs. BNT162b2 1st dose  | age group: 20 - 29 | 4.21 | 1.62 (0.61 to 3.82) | 1.27 (0.48 to 3.39) | 1 |
| Ad26.COV2.S vs. BNT162b2 1st dose  | age group: 30 - 39 | 3.31 | 1.98 (0.95 to 3.82) | 1.35 (0.57 to 3.2)  | 1 |
| Ad26.COV2.S vs. BNT162b2 1st dose  | age group: 40 - 49 | 2.43 | 3.06 (1.78 to 5.28) | 1.79 (0.59 to 5.45) | 0 |
| Ad26.COV2.S vs. BNT162b2 1st dose  | age group: 50 - 59 | 1.73 | 1.55 (1.08 to 2.18) | 1.09 (0.5 to 2.38)  | 0 |
| Ad26.COV2.S vs. BNT162b2 1st dose  | age group: 60 - 69 | 1.67 | 1.09 (0.76 to 1.54) | 0.91 (0.49 to 1.71) | 1 |
| Ad26.COV2.S vs. BNT162b2 1st dose  | age group: 70 - 79 | 1.89 | 0.79 (0.47 to 1.25) | 0.52 (0.21 to 1.28) | 0 |
| Ad26.COV2.S vs. BNT162b2 1st dose  | age group: 80 - 89 | 2.12 | 0.93 (0.52 to 1.55) | 0.72 (0.35 to 1.46) | 1 |
| Ad26.COV2.S vs. BNT162b2 1st dose  | gender = MALE      | 1.43 | 1.33 (1.05 to 1.68) | 1.01 (0.6 to 1.7)   | 0 |
| Ad26.COV2.S vs. BNT162b2 1st dose  | gender = FEMALE    | 1.5  | 1.26 (0.96 to 1.64) | 0.97 (0.55 to 1.71) | 0 |
| Ad26.COV2.S vs. mRNA-1273 1st dose | age group: 20 - 29 | 3.2  | 1.03 (0.41 to 2.23) | 0.87 (0.26 to 2.91) | 1 |
| Ad26.COV2.S vs. mRNA-1273 1st dose | age group: 30 - 39 | 3.4  | 2.09 (0.97 to 4.28) | 1.15 (0.52 to 2.52) | 1 |
| Ad26.COV2.S vs. mRNA-1273 1st dose | age group: 40 - 49 | 2.37 | 2.88 (1.7 to 4.86)  | 1.53 (0.52 to 4.54) | 0 |
| Ad26.COV2.S vs. mRNA-1273 1st dose | age group: 50 - 59 | 1.71 | 1.43 (1 to 2.01)    | 0.98 (0.46 to 2.1)  | 0 |
| Ad26.COV2.S vs. mRNA-1273 1st dose | age group: 60 - 69 | 1.67 | 1.07 (0.74 to 1.5)  | 0.88 (0.6 to 1.29)  | 1 |
| Ad26.COV2.S vs. mRNA-1273 1st dose | age group: 70 - 79 | 1.94 | 0.92 (0.56 to 1.46) | 0.55 (0.22 to 1.39) | 0 |
| Ad26.COV2.S vs. mRNA-1273 1st dose | age group: 80 - 89 | 2.1  | 0.92 (0.52 to 1.53) | 0.69 (0.21 to 2.21) | 0 |
| Ad26.COV2.S vs. mRNA-1273 1st dose | gender = MALE      | 1.43 | 1.37 (1.08 to 1.73) | 0.93 (0.58 to 1.48) | 0 |
| Ad26.COV2.S vs. mRNA-1273 1st dose | gender = FEMALE    | 1.47 | 1.12 (0.85 to 1.44) | 0.8 (0.43 to 1.49)  | 0 |
| <b>TTS_any</b>                     |                    |      |                     |                     |   |
| Ad26.COV2.S vs. BNT162b2 1st dose  | age group: 30 - 39 | 3.59 | 2.38 (1.13 to 4.69) | 1.63 (0.68 to 3.89) | 1 |
| Ad26.COV2.S vs. BNT162b2 1st dose  | age group: 40 - 49 | 2.59 | 2.49 (1.38 to 4.47) | 1.46 (0.47 to 4.56) | 0 |

|                                    |                    |      |                     |                     |   |
|------------------------------------|--------------------|------|---------------------|---------------------|---|
| Ad26.COVS.S vs. BNT162b2 1st dose  | age group: 50 - 59 | 1.87 | 1.58 (1.06 to 2.32) | 1.12 (0.5 to 2.49)  | 0 |
| Ad26.COVS.S vs. BNT162b2 1st dose  | age group: 60 - 69 | 1.75 | 1.16 (0.79 to 1.67) | 0.97 (0.51 to 1.84) | 1 |
| Ad26.COVS.S vs. BNT162b2 1st dose  | age group: 70 - 79 | 2.05 | 0.92 (0.53 to 1.5)  | 0.6 (0.24 to 1.52)  | 0 |
| Ad26.COVS.S vs. BNT162b2 1st dose  | age group: 80 - 89 | 2.31 | 1.23 (0.69 to 2.11) | 0.96 (0.46 to 1.97) | 1 |
| Ad26.COVS.S vs. BNT162b2 1st dose  | gender = MALE      | 1.48 | 1.52 (1.18 to 1.94) | 1.15 (0.68 to 1.95) | 0 |
| Ad26.COVS.S vs. BNT162b2 1st dose  | gender = FEMALE    | 1.58 | 1.21 (0.89 to 1.63) | 0.94 (0.52 to 1.68) | 0 |
| Ad26.COVS.S vs. mRNA-1273 1st dose | age group: 20 - 29 | 4.04 | 1.05 (0.34 to 2.64) | 0.89 (0.23 to 3.5)  | 1 |
| Ad26.COVS.S vs. mRNA-1273 1st dose | age group: 30 - 39 | 3.56 | 2.38 (1.09 to 4.9)  | 1.3 (0.59 to 2.88)  | 1 |
| Ad26.COVS.S vs. mRNA-1273 1st dose | age group: 40 - 49 | 2.59 | 2.61 (1.45 to 4.65) | 1.39 (0.45 to 4.25) | 0 |
| Ad26.COVS.S vs. mRNA-1273 1st dose | age group: 50 - 59 | 1.86 | 1.57 (1.05 to 2.33) | 1.08 (0.49 to 2.37) | 0 |
| Ad26.COVS.S vs. mRNA-1273 1st dose | age group: 60 - 69 | 1.77 | 1.22 (0.82 to 1.77) | 1 (0.66 to 1.52)    | 1 |
| Ad26.COVS.S vs. mRNA-1273 1st dose | age group: 70 - 79 | 2.02 | 0.93 (0.54 to 1.51) | 0.55 (0.21 to 1.43) | 0 |
| Ad26.COVS.S vs. mRNA-1273 1st dose | age group: 80 - 89 | 2.32 | 1.29 (0.72 to 2.19) | 0.97 (0.3 to 3.13)  | 0 |
| Ad26.COVS.S vs. mRNA-1273 1st dose | gender = MALE      | 1.49 | 1.65 (1.28 to 2.11) | 1.12 (0.7 to 1.79)  | 0 |
| Ad26.COVS.S vs. mRNA-1273 1st dose | gender = FEMALE    | 1.55 | 1.08 (0.79 to 1.44) | 0.77 (0.41 to 1.46) | 0 |
| Ad26.COVS.S vs. BNT162b2 1st dose  | gender = MALE      | 6.27 | 3.01 (0.99 to 8.47) | 2.27 (0.68 to 7.59) | 0 |
| <b>VTE</b>                         |                    |      |                     |                     |   |
| Ad26.COVS.S vs. BNT162b2 1st dose  | age group: 30 - 39 | 3.18 | 2.1 (1.06 to 3.94)  | 1.44 (0.64 to 3.26) | 1 |
| Ad26.COVS.S vs. BNT162b2 1st dose  | age group: 40 - 49 | 2.23 | 1.41 (0.82 to 2.31) | 0.82 (0.27 to 2.5)  | 0 |
| Ad26.COVS.S vs. BNT162b2 1st dose  | age group: 50 - 59 | 1.77 | 1.23 (0.83 to 1.77) | 0.87 (0.39 to 1.92) | 0 |
| Ad26.COVS.S vs. BNT162b2 1st dose  | age group: 60 - 69 | 1.6  | 1.19 (0.86 to 1.62) | 1 (0.55 to 1.82)    | 1 |
| Ad26.COVS.S vs. BNT162b2 1st dose  | age group: 70 - 79 | 1.73 | 1.47 (1.02 to 2.09) | 0.96 (0.42 to 2.22) | 0 |
| Ad26.COVS.S vs. BNT162b2 1st dose  | age group: 80 - 89 | 2.24 | 1.06 (0.59 to 1.81) | 0.82 (0.4 to 1.69)  | 1 |
| Ad26.COVS.S vs. BNT162b2 1st dose  | gender = MALE      | 1.45 | 1.34 (1.05 to 1.7)  | 1.01 (0.6 to 1.72)  | 0 |
| Ad26.COVS.S vs. BNT162b2 1st dose  | gender = FEMALE    | 1.43 | 1.34 (1.06 to 1.68) | 1.03 (0.6 to 1.79)  | 0 |
| Ad26.COVS.S vs. mRNA-1273 1st dose | age group: 30 - 39 | 2.64 | 1.31 (0.67 to 2.42) | 0.72 (0.36 to 1.44) | 1 |
| Ad26.COVS.S vs. mRNA-1273 1st dose | age group: 40 - 49 | 2.45 | 1.91 (1.08 to 3.31) | 1.02 (0.34 to 3.09) | 0 |
| Ad26.COVS.S vs. mRNA-1273 1st dose | age group: 50 - 59 | 1.77 | 1.24 (0.84 to 1.79) | 0.85 (0.39 to 1.85) | 0 |
| Ad26.COVS.S vs. mRNA-1273 1st dose | age group: 60 - 69 | 1.61 | 1.27 (0.92 to 1.72) | 1.04 (0.74 to 1.47) | 1 |
| Ad26.COVS.S vs. mRNA-1273 1st dose | age group: 70 - 79 | 1.71 | 1.4 (0.98 to 1.98)  | 0.83 (0.35 to 1.96) | 0 |
| Ad26.COVS.S vs. mRNA-1273 1st dose | age group: 80 - 89 | 2.35 | 1.42 (0.8 to 2.37)  | 1.06 (0.33 to 3.42) | 0 |
| Ad26.COVS.S vs. mRNA-1273 1st dose | gender = MALE      | 1.44 | 1.26 (0.99 to 1.6)  | 0.85 (0.53 to 1.36) | 0 |
| Ad26.COVS.S vs. mRNA-1273 1st dose | gender = FEMALE    | 1.45 | 1.52 (1.2 to 1.92)  | 1.09 (0.59 to 2.01) | 0 |

Supplementary Table 14. Cohort selection and minimal detectable relative risk, database-target-outcome.

| Outcome               | Original cohort                               |         | Without prior outcomes |         | With at least 1 days at risk |         | Matched on propensity score |         | MDRR   |
|-----------------------|-----------------------------------------------|---------|------------------------|---------|------------------------------|---------|-----------------------------|---------|--------|
|                       | Comparator                                    | Target  | Comparator             | Target  | Comparator                   | Target  | Comparator                  | Target  |        |
| <b>CPRD Aurum</b>     | <b>ChAdOx1 1st dose vs. BNT162b2 1st dose</b> |         |                        |         |                              |         |                             |         |        |
| CVST                  | 1840240                                       | 3789631 | 1839907                | 3789045 | 1839631                      | 3788249 | 1946223                     | 1271557 | >12.97 |
| DVT                   | 1840240                                       | 3789631 | 1805035                | 3742139 | 1804763                      | 3741359 | 1912752                     | 1247556 | 1.36   |
| Intestinal infarction | 1840240                                       | 3789631 | 1838922                | 3787830 | 1838646                      | 3787035 | 1945248                     | 1270917 | 2.6    |
| Ischemic stroke       | 1840240                                       | 3789631 | 1829966                | 3777750 | 1829692                      | 3776958 | 1936816                     | 1264894 | 1.59   |
| ATE                   | 1840240                                       | 3789631 | 1774242                | 3716815 | 1773973                      | 3716038 | 1886308                     | 1227495 | 1.23   |
| MI                    | 1840240                                       | 3789631 | 1783628                | 3727853 | 1783357                      | 3727073 | 1895358                     | 1233874 | 1.3    |
| PE                    | 1840240                                       | 3789631 | 1815678                | 3757964 | 1815404                      | 3757176 | 1922818                     | 1254781 | 1.3    |
| SVT                   | 1840240                                       | 3789631 | 1839557                | 3788555 | 1839281                      | 3787759 | 1945829                     | 1271295 | >3.72  |
| Thrombocytopenia      | 1840240                                       | 3789631 | 1724387                | 3622661 | 1724118                      | 3621898 | 1836112                     | 1195498 | 1.17   |
| VTE                   | 1840240                                       | 3789631 | 1785134                | 3716545 | 1784864                      | 3715771 | 1893469                     | 1233788 | 1.24   |
| TTS_ATE               | 1840240                                       | 3789631 | 1839739                | 3789168 | 1839463                      | 3788372 | 1946184                     | 1271530 | >6.12  |
| TTS_CVST              | 1840240                                       | 3789631 | 1840240                | 3789629 | 1839964                      | 3788833 | 1946593                     | 1271821 | Inf    |
| TTS_DVT               | 1840240                                       | 3789631 | 1839885                | 3789215 | 1839609                      | 3788419 | 1946277                     | 1271591 | >12.97 |
| TTS_isc stroke        | 1840240                                       | 3789631 | 1840174                | 3789562 | 1839898                      | 3788766 | 1946536                     | 1271777 | >12.97 |
| TTS_MI                | 1840240                                       | 3789631 | 1839818                | 3789250 | 1839542                      | 3788454 | 1946252                     | 1271585 | >6.12  |
| TTS_PE                | 1840240                                       | 3789631 | 1840046                | 3789394 | 1839770                      | 3788598 | 1946400                     | 1271669 | >6.12  |
| TTS_SVT               | 1840240                                       | 3789631 | 1840211                | 3789592 | 1839935                      | 3788796 | 1946566                     | 1271800 | >12.97 |
| TTS_VTE               | 1840240                                       | 3789631 | 1839724                | 3789016 | 1839448                      | 3788220 | 1946111                     | 1271464 | >5.23  |
| TTS_all stroke        | 1840240                                       | 3789631 | 1839911                | 3789284 | 1839635                      | 3788489 | 1946277                     | 1271609 | >6.12  |
| TTS_any               | 1840240                                       | 3789631 | 1828042                | 3773269 | 1827767                      | 3772477 | 1934651                     | 1263613 | 1.52   |
| <b>CPRD Aurum</b>     | <b>ChAdOx1 2nd dose vs. BNT162b2 2nd dose</b> |         |                        |         |                              |         |                             |         |        |
| CVST                  | 1369238                                       | 1195626 | 1369029                | 1195414 | 1368495                      | 1194604 | 1084284                     | 801323  | Inf    |
| DVT                   | 1369238                                       | 1195626 | 1342243                | 1170572 | 1341717                      | 1169773 | 1063064                     | 784878  | 1.57   |
| Intestinal infarction | 1369238                                       | 1195626 | 1368146                | 1194574 | 1367612                      | 1193764 | 1083567                     | 800793  | >4.82  |
| Ischemic stroke       | 1369238                                       | 1195626 | 1361028                | 1187920 | 1360495                      | 1187113 | 1078360                     | 796695  | 2.21   |
| ATE                   | 1369238                                       | 1195626 | 1317653                | 1149297 | 1317134                      | 1148502 | 1044491                     | 770339  | 1.43   |
| MI                    | 1369238                                       | 1195626 | 1325126                | 1156405 | 1324606                      | 1155608 | 1050018                     | 774713  | 1.54   |
| PE                    | 1369238                                       | 1195626 | 1350256                | 1177764 | 1349726                      | 1176965 | 1069375                     | 789797  | 1.6    |
| SVT                   | 1369238                                       | 1195626 | 1368710                | 1195077 | 1368176                      | 1194267 | 1084010                     | 801100  | >6.00  |
| Thrombocytopenia      | 1369238                                       | 1195626 | 1276719                | 1116141 | 1276204                      | 1115370 | 1012563                     | 747810  | 1.27   |
| VTE                   | 1369238                                       | 1195626 | 1326817                | 1156159 | 1326295                      | 1155369 | 1050916                     | 775486  | 1.4    |
| TTS_ATE               | 1369238                                       | 1195626 | 1368803                | 1195308 | 1368269                      | 1194498 | 1084154                     | 801245  | >6.00  |
| TTS_CVST              | 1369238                                       | 1195626 | 1369238                | 1195625 | 1368704                      | 1194815 | 1084454                     | 801467  | Inf    |
| TTS_DVT               | 1369238                                       | 1195626 | 1368947                | 1195370 | 1368413                      | 1194560 | 1084231                     | 801305  | >6.00  |

|                       |                                               |         |         |         |         |         |         |        |        |
|-----------------------|-----------------------------------------------|---------|---------|---------|---------|---------|---------|--------|--------|
| TTS_isc stroke        | 1369238                                       | 1195626 | 1369184 | 1195576 | 1368650 | 1194766 | 1084417 | 801435 | >6.00  |
| TTS_MI                | 1369238                                       | 1195626 | 1368870 | 1195365 | 1368336 | 1194555 | 1084202 | 801289 | >6.00  |
| TTS_PE                | 1369238                                       | 1195626 | 1369079 | 1195475 | 1368545 | 1194665 | 1084319 | 801375 | >12.61 |
| TTS_SVT               | 1369238                                       | 1195626 | 1369216 | 1195607 | 1368682 | 1194797 | 1084432 | 801452 | Inf    |
| TTS_VTE               | 1369238                                       | 1195626 | 1368811 | 1195241 | 1368277 | 1194431 | 1084118 | 801225 | >5.52  |
| TTS_all stroke        | 1369238                                       | 1195626 | 1368976 | 1195381 | 1368442 | 1194571 | 1084262 | 801318 | >6.00  |
| TTS_any               | 1369238                                       | 1195626 | 1359432 | 1187076 | 1358901 | 1186267 | 1076722 | 795629 | 1.88   |
| <b>Germany_DA</b>     | <b>ChAdOx1 1st dose vs. BNT162b2 1st dose</b> |         |         |         |         |         |         |        |        |
| CVST                  | 391063                                        | 98562   | 391019  | 98555   | 350965  | 89711   | 215180  | 86344  | >7.10  |
| DVT                   | 391063                                        | 98562   | 384716  | 97278   | 344916  | 88463   | 211587  | 85163  | 2.6    |
| Intestinal infarction | 391063                                        | 98562   | 390901  | 98529   | 350850  | 89687   | 215106  | 86325  | Inf    |
| Ischemic stroke       | 391063                                        | 98562   | 384122  | 96966   | 344214  | 88152   | 210616  | 84835  | 3.37   |
| ATE                   | 391063                                        | 98562   | 375271  | 94660   | 335573  | 85890   | 204702  | 82643  | 2.18   |
| MI                    | 391063                                        | 98562   | 381689  | 96137   | 341848  | 87339   | 208975  | 84048  | 2.81   |
| PE                    | 391063                                        | 98562   | 385227  | 97653   | 345384  | 88838   | 212362  | 85493  | 3.37   |
| SVT                   | 391063                                        | 98562   | 390884  | 98542   | 350832  | 89698   | 215110  | 86330  | >15.98 |
| Thrombocytopenia      | 391063                                        | 98562   | 373590  | 94196   | 334413  | 85500   | 204508  | 82281  | 1.79   |
| VTE                   | 391063                                        | 98562   | 380017  | 96507   | 340391  | 87718   | 209244  | 84436  | 2.15   |
| TTS_ATE               | 391063                                        | 98562   | 390936  | 98535   | 350881  | 89691   | 215092  | 86322  | >15.98 |
| TTS_CVST              | 391063                                        | 98562   | 391063  | 98562   | 351008  | 89718   | 215207  | 86351  | Inf    |
| TTS_DVT               | 391063                                        | 98562   | 390996  | 98550   | 350943  | 89706   | 215166  | 86340  | Inf    |
| TTS_isc stroke        | 391063                                        | 98562   | 391009  | 98548   | 350954  | 89704   | 215149  | 86337  | >15.98 |
| TTS_MI                | 391063                                        | 98562   | 390987  | 98549   | 350932  | 89705   | 215148  | 86337  | Inf    |
| TTS_PE                | 391063                                        | 98562   | 390944  | 98542   | 350891  | 89698   | 215135  | 86332  | >15.98 |
| TTS_SVT               | 391063                                        | 98562   | 391052  | 98558   | 350997  | 89714   | 215198  | 86347  | Inf    |
| TTS_VTE               | 391063                                        | 98562   | 390929  | 98541   | 350877  | 89697   | 215139  | 86332  | >15.98 |
| TTS_all stroke        | 391063                                        | 98562   | 390954  | 98543   | 350902  | 89699   | 215114  | 86330  | >15.98 |
| <b>Germany_DA</b>     | <b>Ad26.COVS.2 vs. BNT162b2 1st dose</b>      |         |         |         |         |         |         |        |        |
| CVST                  | 391063                                        | 37723   | 391019  | 37721   | 350965  | 18762   | 68021   | 18706  | >8.62  |
| DVT                   | 391063                                        | 37723   | 384716  | 37360   | 344916  | 18485   | 67016   | 18428  | >8.62  |
| Intestinal infarction | 391063                                        | 37723   | 390901  | 37713   | 350850  | 18758   | 68007   | 18701  | Inf    |
| Ischemic stroke       | 391063                                        | 37723   | 384122  | 37359   | 344214  | 18433   | 66774   | 18379  | >8.61  |
| ATE                   | 391063                                        | 37723   | 375271  | 36825   | 335573  | 17966   | 65173   | 17914  | >4.98  |
| MI                    | 391063                                        | 37723   | 381689  | 37169   | 341848  | 18277   | 66336   | 18223  | >7.15  |
| PE                    | 391063                                        | 37723   | 385227  | 37492   | 345384  | 18581   | 67323   | 18525  | >8.62  |
| SVT                   | 391063                                        | 37723   | 390884  | 37718   | 350832  | 18759   | 68009   | 18703  | Inf    |
| Thrombocytopenia      | 391063                                        | 37723   | 373590  | 36591   | 334413  | 17988   | 65217   | 17933  | 3.8    |
| VTE                   | 391063                                        | 37723   | 380017  | 37166   | 340391  | 18332   | 66431   | 18274  | 6.17   |
| TTS_ATE               | 391063                                        | 37723   | 390936  | 37716   | 350881  | 18757   | 68004   | 18701  | Inf    |

|                       |                                               |        |         |        |         |        |        |        |        |
|-----------------------|-----------------------------------------------|--------|---------|--------|---------|--------|--------|--------|--------|
| TTS_CVST              | 391063                                        | 37723  | 391063  | 37723  | 351008  | 18763  | 68026  | 18707  | Inf    |
| TTS_DVT               | 391063                                        | 37723  | 390996  | 37718  | 350943  | 18758  | 68001  | 18702  | Inf    |
| TTS_isc stroke        | 391063                                        | 37723  | 391009  | 37722  | 350954  | 18762  | 68024  | 18706  | Inf    |
| TTS_MI                | 391063                                        | 37723  | 390987  | 37717  | 350932  | 18758  | 68006  | 18702  | Inf    |
| TTS_PE                | 391063                                        | 37723  | 390944  | 37718  | 350891  | 18759  | 68008  | 18703  | >21.04 |
| TTS_SVT               | 391063                                        | 37723  | 391052  | 37723  | 350997  | 18763  | 68026  | 18707  | Inf    |
| TTS_VTE               | 391063                                        | 37723  | 390929  | 37714  | 350877  | 18755  | 67989  | 18699  | >21.03 |
| <b>IPCI</b>           | <b>ChAdOx1 1st dose vs. BNT162b2 1st dose</b> |        |         |        |         |        |        |        |        |
| CVST                  | 218423                                        | 71083  | 218423  | 71083  | 210487  | 71001  | 49659  | 22239  | Inf    |
| DVT                   | 218423                                        | 71083  | 216639  | 70509  | 208713  | 70427  | 49198  | 22039  | >6.80  |
| Intestinal infarction | 218423                                        | 71083  | 218423  | 71083  | 210487  | 71001  | 49659  | 22239  | Inf    |
| Ischemic stroke       | 218423                                        | 71083  | 216518  | 70513  | 208584  | 70432  | 49162  | 22044  | >6.80  |
| ATE                   | 218423                                        | 71083  | 211448  | 68697  | 203533  | 68619  | 47893  | 21489  | 3.54   |
| MI                    | 218423                                        | 71083  | 213239  | 69237  | 205322  | 69158  | 48370  | 21678  | >5.05  |
| PE                    | 218423                                        | 71083  | 216686  | 70505  | 208768  | 70424  | 49225  | 22043  | >6.22  |
| SVT                   | 218423                                        | 71083  | 218423  | 71083  | 210487  | 71001  | 49659  | 22239  | Inf    |
| Thrombocytopenia      | 218423                                        | 71083  | 214847  | 70030  | 206973  | 69952  | 48710  | 21854  | >4.55  |
| VTE                   | 218423                                        | 71083  | 215067  | 69992  | 207158  | 69911  | 48804  | 21863  | 4.35   |
| TTS_ATE               | 218423                                        | 71083  | 218410  | 71080  | 210474  | 70998  | 49649  | 22236  | Inf    |
| TTS_CVST              | 218423                                        | 71083  | 218423  | 71083  | 210487  | 71001  | 49659  | 22239  | Inf    |
| TTS_DVT               | 218423                                        | 71083  | 218417  | 71082  | 210481  | 71000  | 49655  | 22238  | Inf    |
| TTS_isc stroke        | 218423                                        | 71083  | 218421  | 71083  | 210485  | 71001  | 49659  | 22239  | Inf    |
| TTS_MI                | 218423                                        | 71083  | 218412  | 71080  | 210476  | 70998  | 49649  | 22236  | Inf    |
| TTS_PE                | 218423                                        | 71083  | 218410  | 71081  | 210474  | 70999  | 49653  | 22237  | Inf    |
| TTS_SVT               | 218423                                        | 71083  | 218423  | 71083  | 210487  | 71001  | 49659  | 22239  | Inf    |
| TTS_VTE               | 218423                                        | 71083  | 218407  | 71080  | 210471  | 70998  | 49650  | 22236  | Inf    |
| TTS_all stroke        | 218423                                        | 71083  | 218419  | 71082  | 210483  | 71000  | 49659  | 22239  | Inf    |
| <b>SIDIAP</b>         | <b>Ad26.COVS.5 vs. BNT162b2 1st dose</b>      |        |         |        |         |        |        |        |        |
| CVST                  | 2027950                                       | 138351 | 2027844 | 138339 | 1990871 | 126938 | 423815 | 116789 | Inf    |
| DVT                   | 2027950                                       | 138351 | 2009886 | 137540 | 1973028 | 126189 | 421532 | 116087 | 2.82   |
| Intestinal infarction | 2027950                                       | 138351 | 2025253 | 138252 | 1988290 | 126855 | 423558 | 116709 | >8.61  |
| Ischemic stroke       | 2027950                                       | 138351 | 1972241 | 136360 | 1935389 | 125015 | 417793 | 114999 | 2.15   |
| ATE                   | 2027950                                       | 138351 | 1940805 | 134695 | 1904070 | 123408 | 413039 | 113588 | 1.73   |
| MI                    | 2027950                                       | 138351 | 1993255 | 136561 | 1956402 | 125219 | 418734 | 115276 | 2.67   |
| PE                    | 2027950                                       | 138351 | 2015190 | 137815 | 1978276 | 126442 | 422330 | 116315 | 4.77   |
| SVT                   | 2027950                                       | 138351 | 2026906 | 138287 | 1989938 | 126887 | 423664 | 116747 | >8.61  |
| Thrombocytopenia      | 2027950                                       | 138351 | 1789028 | 126127 | 1754222 | 115521 | 386334 | 106217 | 1.54   |
| VTE                   | 2027950                                       | 138351 | 2001029 | 137188 | 1964216 | 125850 | 420502 | 115760 | 2.48   |
| TTS_ATE               | 2027950                                       | 138351 | 2023991 | 138240 | 1987022 | 126844 | 423524 | 116696 | >8.61  |



|                       |                      |                               |         |        |         |        |         |        |        |
|-----------------------|----------------------|-------------------------------|---------|--------|---------|--------|---------|--------|--------|
| TTS_CVST              | 2027950              | 138351                        | 2027942 | 138350 | 1990968 | 126949 | 423858  | 116802 | Inf    |
| TTS_DVT               | 2027950              | 138351                        | 2027155 | 138321 | 1990183 | 126923 | 423781  | 116779 | >8.61  |
| TTS_isc stroke        | 2027950              | 138351                        | 2025770 | 138290 | 1988798 | 126893 | 423667  | 116737 | >21.00 |
| TTS_MI                | 2027950              | 138351                        | 2026290 | 138302 | 1989318 | 126902 | 423714  | 116762 | >21.00 |
| TTS_PE                | 2027950              | 138351                        | 2027112 | 138316 | 1990144 | 126917 | 423767  | 116773 | >21.00 |
| TTS_SVT               | 2027950              | 138351                        | 2027749 | 138343 | 1990776 | 126942 | 423830  | 116795 | Inf    |
| TTS_VTE               | 2027950              | 138351                        | 2026620 | 138297 | 1989653 | 126901 | 423710  | 116760 | >8.61  |
| TTS_all stroke        | 2027950              | 138351                        | 2025382 | 138280 | 1988414 | 126884 | 423637  | 116726 | >21.00 |
| <b>US_Open_Claims</b> | <b>Ad26.COVS.2.S</b> | <b>vs. BNT162b2 1st dose</b>  |         |        |         |        |         |        |        |
| CVST                  | 6055754              | 939748                        | 6055085 | 939659 | 5377556 | 639457 | 2405656 | 639456 | >7.96  |
| DVT                   | 6055754              | 939748                        | 5963034 | 927070 | 5288749 | 628004 | 2363428 | 628002 | 1.37   |
| Intestinal infarction | 6055754              | 939748                        | 6046033 | 938328 | 5368789 | 638258 | 2401293 | 638257 | 2.43   |
| Ischemic stroke       | 6055754              | 939748                        | 5926489 | 922291 | 5253145 | 623397 | 2348140 | 623396 | 1.29   |
| ATE                   | 6055754              | 939748                        | 5843606 | 908728 | 5172933 | 610896 | 2304844 | 610895 | 1.14   |
| MI                    | 6055754              | 939748                        | 5956952 | 924232 | 5282441 | 625169 | 2356142 | 625168 | 1.31   |
| PE                    | 6055754              | 939748                        | 6000736 | 932417 | 5325183 | 632835 | 2380869 | 632834 | 1.44   |
| SVT                   | 6055754              | 939748                        | 6052148 | 939279 | 5374738 | 639112 | 2404366 | 639111 | 3.59   |
| Thrombocytopenia      | 6055754              | 939748                        | 5958632 | 926904 | 5285775 | 628294 | 2364195 | 628293 | 1.31   |
| VTE                   | 6055754              | 939748                        | 5930163 | 922661 | 5257227 | 624003 | 2348419 | 624001 | 1.3    |
| TTS_ATE               | 6055754              | 939748                        | 6052570 | 939364 | 5375116 | 639180 | 2404622 | 639179 | >4.49  |
| TTS_CVST              | 6055754              | 939748                        | 6055739 | 939747 | 5378182 | 639538 | 2405961 | 639537 | >21.67 |
| TTS_DVT               | 6055754              | 939748                        | 6053805 | 939521 | 5376301 | 639334 | 2405147 | 639333 | 5.58   |
| TTS_isc stroke        | 6055754              | 939748                        | 6054244 | 939571 | 5376736 | 639374 | 2405354 | 639373 | >6.74  |
| TTS_MI                | 6055754              | 939748                        | 6054026 | 939529 | 5376525 | 639336 | 2405217 | 639335 | >6.74  |
| TTS_PE                | 6055754              | 939748                        | 6054201 | 939563 | 5376688 | 639368 | 2405319 | 639367 | 6.29   |
| TTS_SVT               | 6055754              | 939748                        | 6055459 | 939714 | 5377908 | 639507 | 2405815 | 639506 | >8.80  |
| TTS_VTE               | 6055754              | 939748                        | 6053209 | 939451 | 5375727 | 639270 | 2404904 | 639269 | 4.07   |
| TTS_all stroke        | 6055754              | 939748                        | 6053844 | 939527 | 5376349 | 639334 | 2405207 | 639333 | 7.28   |
| TTS_any               | 6055754              | 939748                        | 5961410 | 927210 | 5288474 | 628572 | 2365254 | 628571 | 1.35   |
| <b>US_Open_Claims</b> | <b>Ad26.COVS.2.S</b> | <b>vs. mRNA-1273 1st dose</b> |         |        |         |        |         |        |        |
| CVST                  | 4261016              | 939967                        | 4260530 | 939878 | 4002663 | 639619 | 2272268 | 639619 | >8.50  |
| DVT                   | 4261016              | 939967                        | 4179884 | 927287 | 3923371 | 628164 | 2230157 | 628164 | 1.37   |
| Intestinal infarction | 4261016              | 939967                        | 4251889 | 938545 | 3994166 | 638418 | 2267972 | 638418 | 2.38   |
| Ischemic stroke       | 4261016              | 939967                        | 4145567 | 922509 | 3889750 | 623557 | 2214613 | 623557 | 1.29   |
| ATE                   | 4261016              | 939967                        | 4064922 | 908944 | 3810684 | 611054 | 2171445 | 611054 | 1.13   |
| MI                    | 4261016              | 939967                        | 4166608 | 924449 | 3910513 | 625329 | 2222711 | 625329 | 1.3    |
| PE                    | 4261016              | 939967                        | 4213302 | 932636 | 3956266 | 632997 | 2247746 | 632997 | 1.45   |
| SVT                   | 4261016              | 939967                        | 4258228 | 939498 | 4000424 | 639274 | 2271071 | 639274 | 3.68   |
| Thrombocytopenia      | 4261016              | 939967                        | 4180086 | 927125 | 3924097 | 628459 | 2231498 | 628459 | 1.3    |

|                |         |        |         |        |         |        |         |        |        |
|----------------|---------|--------|---------|--------|---------|--------|---------|--------|--------|
| VTE            | 4261016 | 939967 | 4151615 | 922878 | 3895669 | 624163 | 2215499 | 624163 | 1.3    |
| TTS_ATE        | 4261016 | 939967 | 4258299 | 939583 | 4000482 | 639342 | 2271303 | 639342 | >3.51  |
| TTS_CVST       | 4261016 | 939967 | 4261011 | 939966 | 4003140 | 639700 | 2272570 | 639700 | >20.62 |
| TTS_DVT        | 4261016 | 939967 | 4259478 | 939740 | 4001635 | 639496 | 2271774 | 639496 | 4.93   |
| TTS_isc stroke | 4261016 | 939967 | 4259779 | 939790 | 4001931 | 639536 | 2272003 | 639536 | >5.43  |
| TTS_MI         | 4261016 | 939967 | 4259484 | 939748 | 4001644 | 639498 | 2271842 | 639498 | >4.72  |
| TTS_PE         | 4261016 | 939967 | 4259644 | 939782 | 4001796 | 639530 | 2271912 | 639530 | 6.53   |
| TTS_SVT        | 4261016 | 939967 | 4260797 | 939933 | 4002932 | 639669 | 2272454 | 639669 | >8.50  |
| TTS_VTE        | 4261016 | 939967 | 4258961 | 939670 | 4001130 | 639432 | 2271552 | 639432 | 3.87   |
| TTS_all stroke | 4261016 | 939967 | 4259463 | 939746 | 4001622 | 639496 | 2271845 | 639496 | 6.1    |
| TTS_any        | 4261016 | 939967 | 4182368 | 927431 | 3926355 | 628737 | 2232550 | 628737 | 1.34   |

Supplementary Table 15. List of covariates with top 10 highest absolute value of propensity score model coefficient.

| Covariate                                                                                               | Coefficient | Covariate                                                                                           | Coefficient |
|---------------------------------------------------------------------------------------------------------|-------------|-----------------------------------------------------------------------------------------------------|-------------|
| <b>CPRD_Aurum - ChAdOx1 1st dose - BNT162b2 1st dose</b>                                                |             | <b>CPRD_Aurum - ChAdOx1 2nd dose - BNT162b2 2nd dose</b>                                            |             |
| index month: 12                                                                                         | -6.75       | observation distinct concept count during day -180 through -4 concept_count relative to index       | -7.05       |
| observation distinct concept count during day -180 through -4 concept_count relative to index           | -4.73       | index month: 1                                                                                      | -6.61       |
| visit_occurrence concept count during day -180 through -4 concept_count relative to index: Office Visit | 4.51        | index month: 2                                                                                      | -2.21       |
| index month: 1                                                                                          | -4.46       | observation during day -180 through -4 days relative to index: Housebound                           | 1.95        |
| measurement distinct concept count during day -180 through -4 concept_count relative to index           | -4.08       | procedure_occurrence during day -180 through -4 days relative to index: Administration of vaccine   | -1.79       |
| visit_occurrence concept count during day -180 through -4 concept_count relative to index               | -4.07       | index month: 12                                                                                     | -1.77       |
| index year: 2020                                                                                        | -3.83       | observation during day -180 through -4 days relative to index: Temporarily housebound               | 1.61        |
| index month: 2                                                                                          | -3.33       | measurement during day -180 through -4 days relative to index: Well person screening                | 1.57        |
| procedure_occurrence during day -180 through -4 days relative to index: Administration of vaccine       | -2.47       | observation during day -180 through -4 days relative to index: Informed consent given for treatment | -1.56       |
| drug_era distinct concept count during day -180 through -4 concept_count relative to index              | -2.29       | observation during day -180 through -4 days relative to index: Appointment cancelled by service     | -1.44       |
|                                                                                                         |             |                                                                                                     |             |
| <b>France_LPD - ChAdOx1 1st dose - BNT162b2 1st dose</b>                                                |             | <b>France_LPD - ChAdOx1 1st dose - mRNA-1273 1st dose</b>                                           |             |
| index month: 1                                                                                          | -6.42       | index month: 8                                                                                      | -6.64       |
| CHADS2VASc                                                                                              | -6.00       | index month: 9                                                                                      | -5.75       |
| index month: 8                                                                                          | -4.69       | index month: 1                                                                                      | -5.22       |
| visit_occurrence concept count during day -180 through -4 concept_count relative to index               | 4.00        | index month: 7                                                                                      | -4.10       |

|                                                                                                                  |       |  |                                                                                                             |        |
|------------------------------------------------------------------------------------------------------------------|-------|--|-------------------------------------------------------------------------------------------------------------|--------|
| age group: 20 - 29                                                                                               | -3.36 |  | index month: 6                                                                                              | -3.69  |
| index month: 9                                                                                                   | -3.31 |  | CHADS2VAsc                                                                                                  | -3.43  |
| age group: 10 - 19                                                                                               | -3.08 |  | age group: 20 - 29                                                                                          | -3.33  |
| age group: 30 - 39                                                                                               | -3.04 |  | age group: 10 - 19                                                                                          | -2.96  |
| measurement during day -180 through -4 days relative to index: Potassium [Moles/time] in 24 hour Urine           | -2.83 |  | age group: 30 - 39                                                                                          | -2.92  |
| age group: 40 - 49                                                                                               | -2.78 |  | age group: 40 - 49                                                                                          | -2.88  |
|                                                                                                                  |       |  |                                                                                                             |        |
| Germany_DA - ChAdOx1 1st dose - BNT162b2 1st dose                                                                |       |  | Germany_DA - Janssen COVID-19- BNT162b2 1st dose                                                            |        |
| index month: 8                                                                                                   | -3.76 |  | index month: 6                                                                                              | 5.92   |
| index month: 7                                                                                                   | -2.64 |  | index month: 8                                                                                              | 4.96   |
| index month: 3                                                                                                   | 2.28  |  | measurement distinct concept count during day -180 through -4 concept_count relative to index               | 4.77   |
| age group: 10 - 19                                                                                               | -1.77 |  | index month: 5                                                                                              | 4.66   |
| index month: 9                                                                                                   | -1.68 |  | index month: 7                                                                                              | 4.52   |
| gender = MALE                                                                                                    | 1.44  |  | index month: 9                                                                                              | 4.06   |
| index month: 6                                                                                                   | -1.42 |  | Charlson index - Romano adaptation                                                                          | 2.25   |
| drug_era distinct concept count during day -180 through -4 concept_count relative to index                       | -1.24 |  | drug_era distinct concept count during day -180 through -4 concept_count relative to index                  | 2.02   |
| index month: 4                                                                                                   | -1.22 |  | gender = FEMALE                                                                                             | -1.75  |
| age group: 20 - 29                                                                                               | -1.05 |  | age group: 10 - 19                                                                                          | -1.28  |
|                                                                                                                  |       |  |                                                                                                             |        |
| <b>Germany_DA - ChAdOx1 2nd dose - BNT162b2 2nd dose</b>                                                         |       |  | <b>SIDIAP - Ad26.COVS.S- BNT162b2 1st dose</b>                                                              |        |
| index month: 4                                                                                                   | -4.10 |  | CHADS2VAsc                                                                                                  | -10.04 |
| index month: 5                                                                                                   | -2.20 |  | index month: 1                                                                                              | -6.91  |
| age group: 10 - 19                                                                                               | -2.15 |  | index month: 3                                                                                              | -6.24  |
| drug_era distinct concept count during day -180 through -4 concept_count relative to index                       | -1.67 |  | index month: 2                                                                                              | -6.00  |
| age group: 30 - 39                                                                                               | -1.44 |  | index month: 12                                                                                             | -4.02  |
| drug_era group during day -180 through -4 days relative to index: ascorbic acid                                  | 1.39  |  | visit_occurrence concept count during day -180 through -4 concept_count relative to index: Telehealth       | -3.95  |
| age group: 20 - 29                                                                                               | -1.37 |  | age group: 60 - 69                                                                                          | 3.75   |
| condition_era group during day -9999 through -4 days relative to index: Attention deficit hyperactivity disorder | -1.25 |  | age group: 70 - 79                                                                                          | 2.75   |
| age group: 40 - 49                                                                                               | -1.24 |  | visit_occurrence concept count during day -180 through -4 concept_count relative to index: Outpatient Visit | 2.56   |
| visit_occurrence concept count during day -180 through -4 concept_count relative to index: Office Visit          | 1.14  |  | condition_era group during day -9999 through -4 days relative to index: Transient cerebral ischemia         | 1.95   |
|                                                                                                                  |       |  |                                                                                                             |        |
| <b>US_Open_Claims - Ad26.COVS.S - BNT162b2 1st dose</b>                                                          |       |  | <b>US_Open_Claims - Ad26.COVS.S - mRNA-1273 1st dose</b>                                                    |        |
| index month: 1                                                                                                   | -9.36 |  | index month: 1                                                                                              | -8.60  |
| index month: 2                                                                                                   | -7.67 |  | index month: 2                                                                                              | -7.62  |
| visit_occurrence concept count during day -180 through -4 concept_count relative to index                        | 5.51  |  | visit_occurrence concept count during day -180 through -4 concept_count relative to index                   | 3.91   |

|                                                                                                                           |       |  |                                                                                               |       |
|---------------------------------------------------------------------------------------------------------------------------|-------|--|-----------------------------------------------------------------------------------------------|-------|
| visit_occurrence concept count during day -180 through -4 concept_count relative to index: Off Campus-Outpatient Hospital | -5.05 |  | index month: 12                                                                               | -3.84 |
| index month: 12                                                                                                           | -4.54 |  | drug_era distinct concept count during day -180 through -4 concept_count relative to index    | 3.80  |
| drug_era distinct concept count during day -180 through -4 concept_count relative to index                                | 3.79  |  | index year: 2020                                                                              | -2.50 |
| visit_occurrence concept count during day -180 through -4 concept_count relative to index: Rural Health Clinic            | 3.05  |  | index month: 6                                                                                | 1.51  |
| index year: 2020                                                                                                          | -2.91 |  | Charlson index - Romano adaptation                                                            | 1.28  |
| index month: 9                                                                                                            | -1.95 |  | observation distinct concept count during day -180 through -4 concept_count relative to index | 1.21  |
| Charlson index - Romano adaptation                                                                                        | 1.69  |  | index month: 9                                                                                | 0.94  |
|                                                                                                                           |       |  |                                                                                               |       |

## Figures

Figure 1. Passed systematic error diagnostic: <20% negative control outcomes associated with exposure in the uncalibrated analyses (CPRD Aurum, 1<sup>st</sup> dose ChAdOx1 vs BNT162b2)

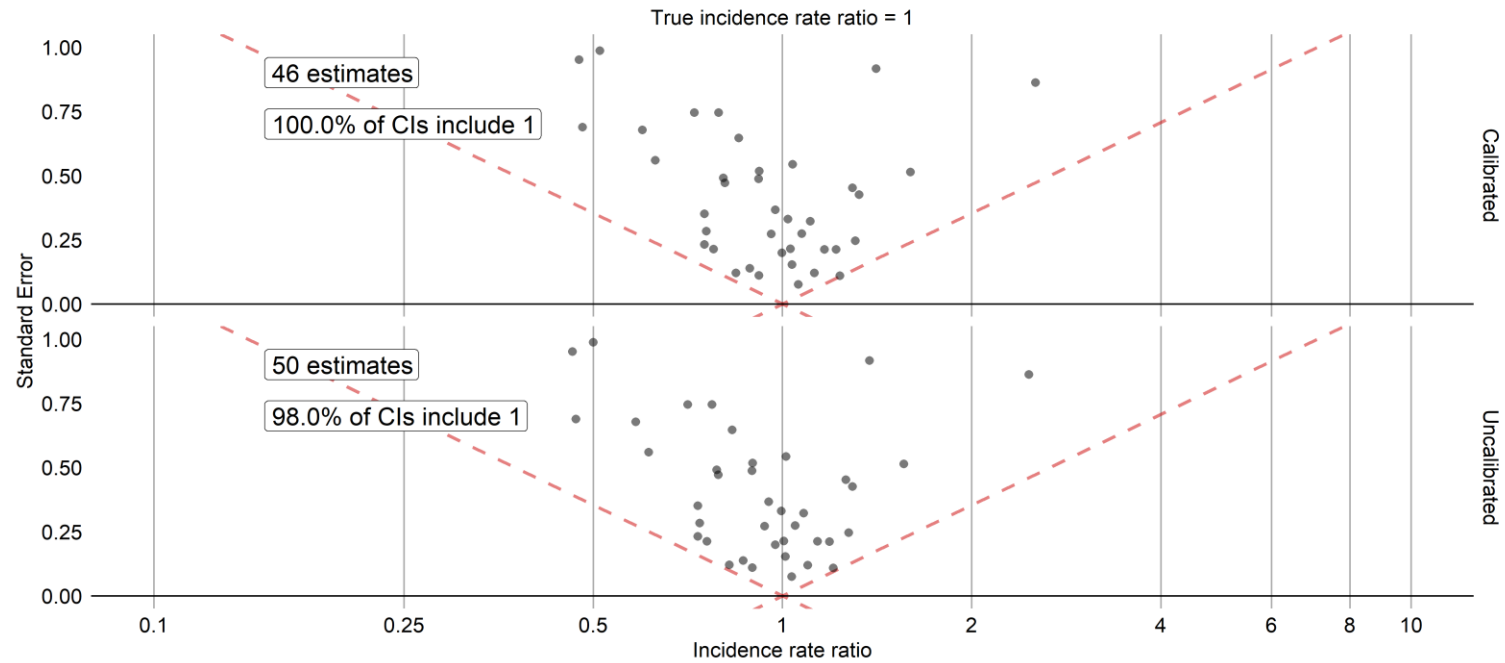

Estimates below the diagonal dashed lines are statistically significant ( $\alpha = 0.05$ ) different from the true effect size (expected IRR=1). A well-calibrated estimator should have the true effect size within the 95 percent confidence interval 95 percent of times.

Figure 2. Systematic error in the comparison between Janssen and mRNA vaccines in US Open Claims

Figure 2a. Systematic error in the analysis of Janssen vs 1-dose BNT162b2

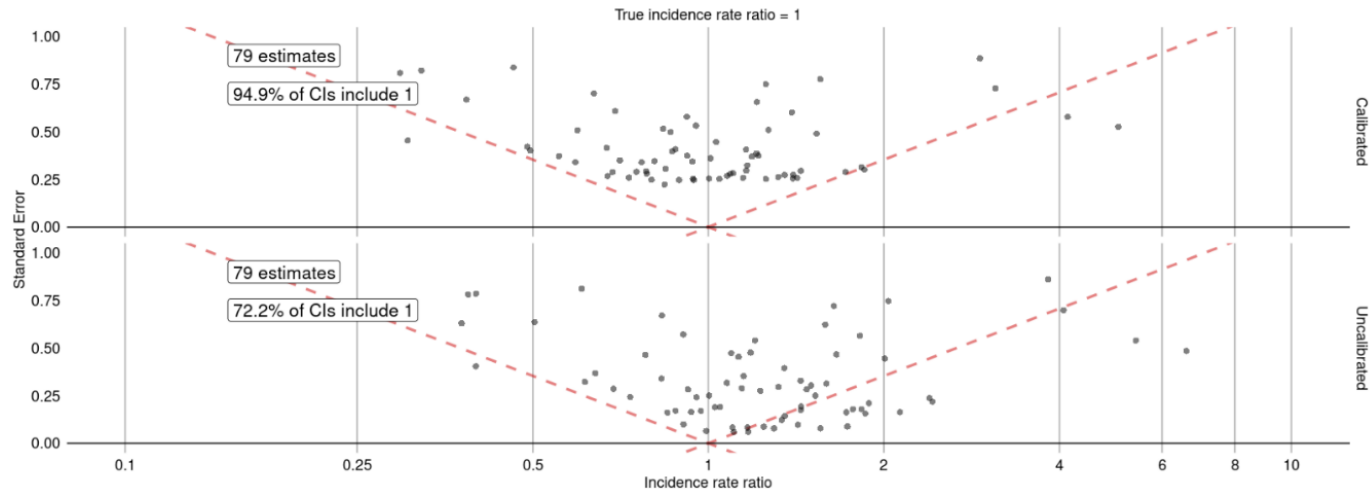

Figure 2b. Systematic error in the analysis of Janssen vs 1-dose mRNA-1273

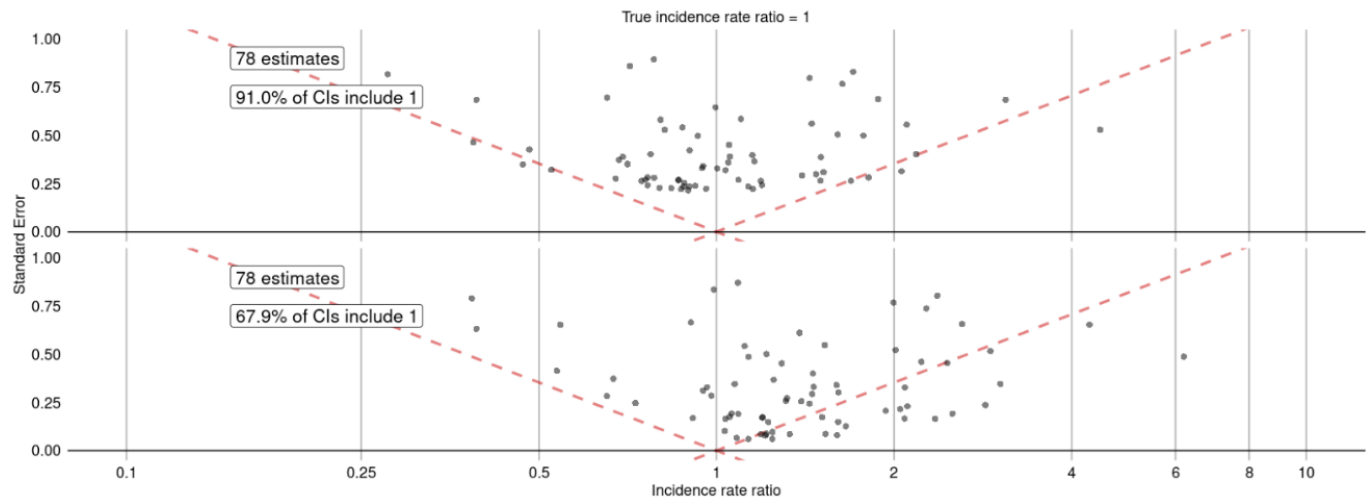

### Figure 3. Systematic error in meta-analysis

Figure 3a. Systematic error in the analysis of first-dose ChAdOx1 vs 1-dose BNT162b2.

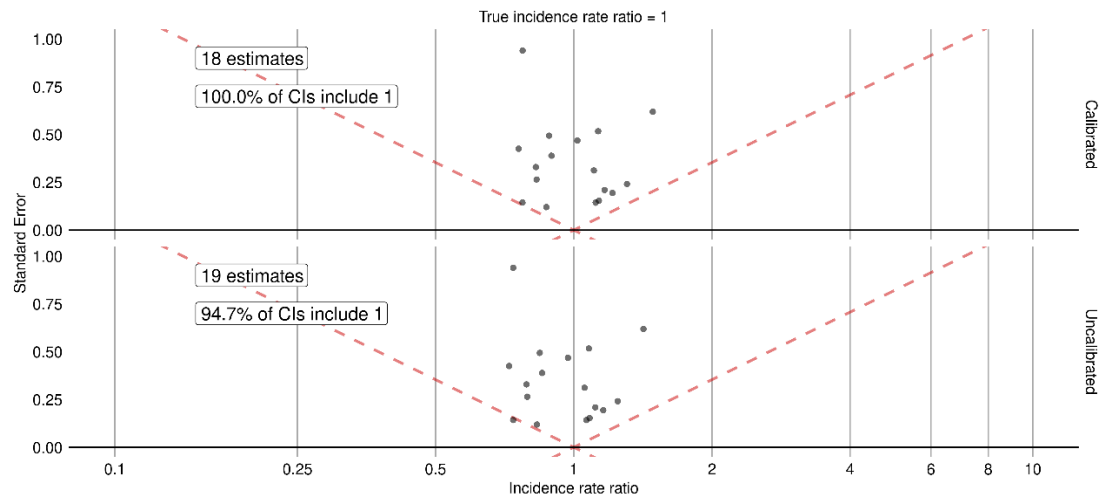

Figure 3b. Systematic error in the analysis of second-dose ChAdOx1 vs 1-dose BNT162b2.

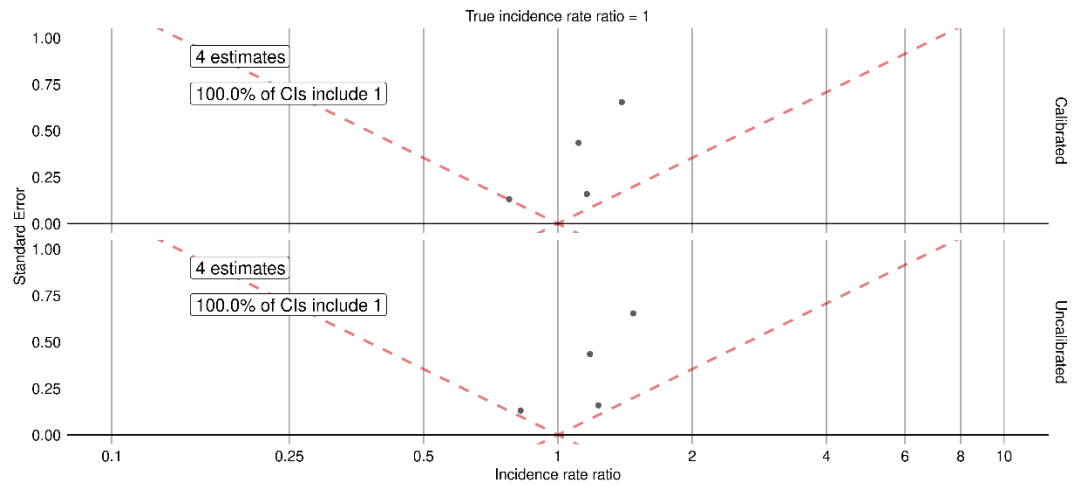

Figure 3c. Systematic error in the analysis of Ad26.COVS.S vs 1-dose BNT162

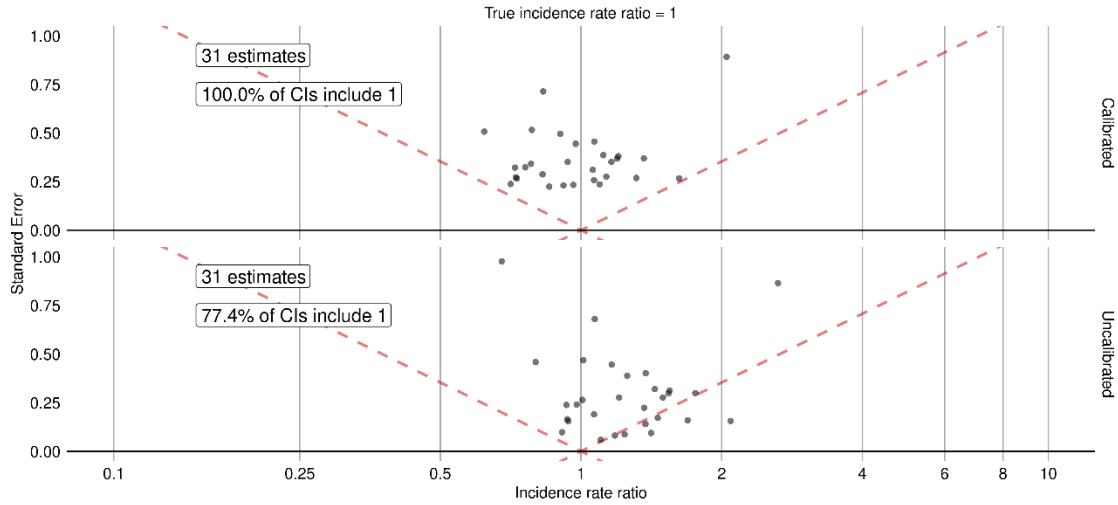

Supplement: lix071594.ww1.pdf [file lix071594.ww1.pdf]
