# Supplementary material for: Comparative risk of thrombosis with thrombocytopenia syndrome or thromboembolic events associated with different covid-19 vaccines: international network cohort study from five European countries and the US
Source: PubMed Central journal article supplement (PMC9597610; doi:10.1136/bmj-2022-071594), 2022-10-26
Supplement: lix071594.ww2.pdf [file lix071594.ww2.pdf]

Supplementary Materials B

**Concept set for persons vaccinated against SARS-CoV-2**

| Concept ID        | Name                                                                                                                                                                             | Vocabulary |
|-------------------|----------------------------------------------------------------------------------------------------------------------------------------------------------------------------------|------------|
| 59267100003       | SARS-CoV-2 (COVID-19) vaccine, mRNA-BNT162b2 0.1 MG/ML Injectable Suspension                                                                                                     | NDC        |
| 59267100002       | SARS-CoV-2 (COVID-19) vaccine, mRNA-BNT162b2 0.1 MG/ML Injectable Suspension                                                                                                     | NDC        |
| 592671000         | bnt162b2 .23mg/1.8mL INTRAMUSCULAR INJECTION, SUSPENSION                                                                                                                         | NDC        |
| 80777027310       | SARS-CoV-2 (COVID-19) vaccine, mRNA-1273 0.2 MG/ML Injectable Suspension                                                                                                         | NDC        |
| 2470234           | SARS-CoV-2 (COVID-19) vaccine, mRNA-1273 0.2 MG/ML Injectable Suspension                                                                                                         | RxNorm     |
| 2470233           | SARS-CoV-2 (COVID-19) vaccine, mRNA-1273 0.2 MG/ML                                                                                                                               | RxNorm     |
| 2470232           | SARS-CoV-2 (COVID-19) vaccine, mRNA-1273                                                                                                                                         | RxNorm     |
| 2468235           | SARS-CoV-2 (COVID-19) vaccine, mRNA-BNT162b2 0.1 MG/ML Injectable Suspension                                                                                                     | RxNorm     |
| 2468234           | SARS-CoV-2 (COVID-19) vaccine, mRNA spike protein Injectable Suspension                                                                                                          | RxNorm     |
| 2468233           | SARS-CoV-2 (COVID-19) vaccine, mRNA spike protein Injectable Product                                                                                                             | RxNorm     |
| 2468232           | SARS-CoV-2 (COVID-19) vaccine, mRNA-BNT162b2 0.1 MG/ML                                                                                                                           | RxNorm     |
| 2468231           | SARS-CoV-2 (COVID-19) vaccine, mRNA spike protein                                                                                                                                | RxNorm     |
| 2468230           | SARS-CoV-2 (COVID-19) vaccine, mRNA-BNT162b2                                                                                                                                     | RxNorm     |
| 80777027399       | SARS-CoV-2 (COVID-19) vaccine, mRNA-1273 0.2 MG/ML Injectable Suspension                                                                                                         | NDC        |
| 807770273         | cx-024414 .2mg/mL INTRAMUSCULAR INJECTION, SUSPENSION                                                                                                                            | NDC        |
| 39214411000001100 | Generic COVID-19 mRNA Vaccine BNT162b2 30micrograms/0.3ml dose concentrate for suspension for injection multidose vials (Pfizer-BioNTech) 1170 dose                              | dm+d       |
| 39326611000001100 | Generic COVID-19 mRNA (nucleoside modified) Vaccine Moderna 0.1mg/0.5mL dose dispersion for injection multidose vials 100 dose                                                   | dm+d       |
| 39326811000001100 | Generic COVID-19 mRNA (nucleoside modified) Vaccine Moderna 0.1mg/0.5mL dose dispersion for injection multidose vials                                                            | dm+d       |
| 39214511000001100 | COVID-19 mRNA Vaccine BNT162b2 30micrograms/0.3ml dose concentrate for suspension for injection multidose vials (Pfizer-BioNTech) (Pfizer-BioNTech) 1170 dose 195 x 6 dose vials | dm+d       |
| 39327011000001100 | COVID-19 mRNA (nucleoside modified) Vaccine Moderna 0.1mg/0.5mL dose dispersion for injection multidose vials (Moderna, Inc) 100 dose 10 x 10 dose vials                         | dm+d       |
| 39326911000001100 | COVID-19 mRNA (nucleoside modified) Vaccine Moderna 0.1mg/0.5mL dose dispersion for injection multidose vials                                                                    | dm+d       |

|                   |                                                                                                                                                                                                               |      |
|-------------------|---------------------------------------------------------------------------------------------------------------------------------------------------------------------------------------------------------------|------|
| 39115611000001100 | COVID-19 mRNA Vaccine BNT162b2<br>30micrograms/0.3ml dose concentrate for suspension<br>for injection multidose vials (Pfizer-BioNTech)                                                                       | dm+d |
| 39115311000001100 | Generic COVID-19 mRNA Vaccine BNT162b2<br>30micrograms/0.3ml dose concentrate for suspension<br>for injection multidose vials (Pfizer-BioNTech) 6 dose                                                        | dm+d |
| 39115711000001100 | COVID-19 mRNA Vaccine BNT162b2<br>30micrograms/0.3ml dose concentrate for suspension<br>for injection multidose vials (Pfizer-BioNTech) (Pfizer-<br>BioNTech) 6 dose                                          | dm+d |
| 39116111000001100 | Generic COVID-19 mRNA Vaccine BNT162b2<br>30micrograms/0.3ml dose concentrate for suspension<br>for injection multidose vials (Pfizer-BioNTech)                                                               | dm+d |
| 59676058005       | Janssen COVID-19 vaccine, DNA, spike protein,<br>adenovirus type 26 (Ad26) vector, preservative free,<br>5x10 <sup>10</sup> viral particles/0.5mL dosage, for intramuscular<br>use                            | NDC  |
| 310122210         | AZD1222 Astrazeneca COVID-19 vaccine, DNA, spike<br>protein, chimpanzee adenovirus Oxford 1 (ChAdOx1)<br>vector, preservative free, 5x10 <sup>10</sup> viral particles/0.5mL<br>dosage, for intramuscular use | NDC  |
| 310122215         | azd1222 50000000000[VP]/.5mL INTRAMUSCULAR<br>INJECTION, SUSPENSION                                                                                                                                           | NDC  |
| 59267100001       | SARS-CoV-2 (COVID-19) vaccine, mRNA-BNT162b2<br>0.1 MG/ML Injectable Suspension                                                                                                                               | NDC  |
| 91303             | Janssen Covid-19 Vaccine                                                                                                                                                                                      | CPT4 |
| 91302             | AstraZeneca Covid-19 Vaccine                                                                                                                                                                                  | CPT4 |
| 91301             | Moderna Covid-19 Vaccine                                                                                                                                                                                      | CPT4 |
| 91300             | Pfizer-Biontech Covid-19 Vaccine                                                                                                                                                                              | CPT4 |
| 0022A             | AstraZeneca Covid-19 Vaccine Administration - Second<br>Dose                                                                                                                                                  | CPT4 |
| 0021A             | AstraZeneca Covid-19 Vaccine Administration - First<br>Dose                                                                                                                                                   | CPT4 |
| 0031A             | Janssen Covid-19 Vaccine Administration                                                                                                                                                                       | CPT4 |
| 0012A             | Moderna Covid-19 Vaccine Administration - Second<br>Dose                                                                                                                                                      | CPT4 |
| 0011A             | Moderna Covid-19 Vaccine Administration - First Dose                                                                                                                                                          | CPT4 |
| 0002A             | Pfizer-Biontech Covid-19 Vaccine Administration -<br>Second Dose                                                                                                                                              | CPT4 |
| 0001A             | Pfizer-Biontech Covid-19 Vaccine Administration - First<br>Dose                                                                                                                                               | CPT4 |
| 208               | SARS-COV-2 (COVID-19) vaccine, mRNA, spike<br>protein, LNP, preservative free, 30 mcg/0.3mL dose                                                                                                              | CVX  |
| 207               | SARS-COV-2 (COVID-19) vaccine, mRNA, spike<br>protein, LNP, preservative free, 100 mcg/0.5mL dose                                                                                                             | CVX  |
| 210               | SARS-COV-2 (COVID-19) vaccine, vector non-<br>replicating, recombinant spike protein-ChAdOx1,<br>preservative free, 0.5 mL                                                                                    | CVX  |
| 212               | SARS-COV-2 (COVID-19) vaccine, vector non-<br>replicating, recombinant spike protein-Ad26,<br>preservative free, 0.5 mL                                                                                       | CVX  |

## List of included concepts for study outcomes

### ***Cerebral venous sinus thrombosis (CVST)***

| <b>Concept ID</b> | <b>Concept name</b>                                    | <b>Vocabulary</b> | <b>Is excluded?</b> | <b>Include descendants?</b> |
|-------------------|--------------------------------------------------------|-------------------|---------------------|-----------------------------|
| 4102202           | Cerebral venous sinus thrombosis                       | SNOMED            | FALSE               | FALSE                       |
| 4048786           | Cerebral venous thrombosis of sigmoid sinus            | SNOMED            | FALSE               | FALSE                       |
| 4043735           | Cerebral venous thrombosis of straight sinus           | SNOMED            | FALSE               | FALSE                       |
| 4111713           | Non-pyogenic venous sinus thrombosis                   | SNOMED            | FALSE               | FALSE                       |
| 314667            | Nonpyogenic thrombosis of intracranial venous sinus    | SNOMED            | FALSE               | FALSE                       |
| 4116206           | Septic thrombophlebitis of cavernous sinus             | SNOMED            | FALSE               | FALSE                       |
| 4121335           | Septic thrombophlebitis of lateral sinus               | SNOMED            | FALSE               | FALSE                       |
| 4119136           | Septic thrombophlebitis of sagittal sinus              | SNOMED            | FALSE               | FALSE                       |
| 4041680           | Septic thrombophlebitis of sigmoid sinus               | SNOMED            | FALSE               | FALSE                       |
| 4100225           | Thrombophlebitis lateral venous sinus                  | SNOMED            | FALSE               | FALSE                       |
| 4217471           | Thrombophlebitis of basilar sinus                      | SNOMED            | FALSE               | FALSE                       |
| 4104695           | Thrombophlebitis of cavernous sinus                    | SNOMED            | FALSE               | FALSE                       |
| 4167985           | Thrombophlebitis of inferior sagittal sinus            | SNOMED            | FALSE               | FALSE                       |
| 764714            | Thrombophlebitis of sigmoid sinus                      | SNOMED            | FALSE               | FALSE                       |
| 4100224           | Thrombophlebitis of superior longitudinal venous sinus | SNOMED            | FALSE               | FALSE                       |
| 4098706           | Thrombophlebitis of superior sagittal sinus            | SNOMED            | FALSE               | FALSE                       |
| 4277833           | Thrombophlebitis of torcular Herophili                 | SNOMED            | FALSE               | FALSE                       |
| 764710            | Thrombophlebitis of transverse sinus                   | SNOMED            | FALSE               | FALSE                       |
| 4228209           | Thrombosis of basilar sinus                            | SNOMED            | FALSE               | FALSE                       |
| 4234264           | Thrombosis of cavernous venous sinus                   | SNOMED            | FALSE               | FALSE                       |
| 4048890           | Thrombosis of inferior sagittal sinus                  | SNOMED            | FALSE               | FALSE                       |
| 4057329           | Thrombosis of lateral venous sinus                     | SNOMED            | FALSE               | FALSE                       |
| 4102203           | Thrombosis of superior longitudinal sinus              | SNOMED            | FALSE               | FALSE                       |
| 4290940           | Thrombosis of superior sagittal sinus                  | SNOMED            | FALSE               | FALSE                       |
| 4079905           | Thrombosis of torcular Herophili                       | SNOMED            | FALSE               | FALSE                       |
| 4105338           | Thrombosis transverse sinus                            | SNOMED            | FALSE               | FALSE                       |

### ***Deep vein thrombosis***

| <b>Concept ID</b> | <b>Concept name</b>                                                                        | <b>Vocabulary</b> | <b>Is excluded?</b> | <b>Include descendants?</b> |
|-------------------|--------------------------------------------------------------------------------------------|-------------------|---------------------|-----------------------------|
| 762047            | Acute bilateral thrombosis of subclavian veins                                             | SNOMED            | FALSE               | FALSE                       |
| 762148            | Acute deep vein thrombosis of bilateral iliac veins                                        | SNOMED            | FALSE               | FALSE                       |
| 761444            | Acute deep vein thrombosis of bilateral lower limbs following coronary artery bypass graft | SNOMED            | FALSE               | FALSE                       |
| 35616028          | Acute deep vein thrombosis of left iliac vein                                              | SNOMED            | FALSE               | FALSE                       |
| 35615035          | Acute deep vein thrombosis of left lower limb following procedure                          | SNOMED            | FALSE               | FALSE                       |

|          |                                                                                       |        |       |       |
|----------|---------------------------------------------------------------------------------------|--------|-------|-------|
| 761416   | Acute deep vein thrombosis of left upper limb following coronary artery bypass graft  | SNOMED | FALSE | FALSE |
| 35615031 | Acute deep vein thrombosis of left upper limb following procedure                     | SNOMED | FALSE | FALSE |
| 43531681 | Acute deep vein thrombosis of lower limb                                              | SNOMED | FALSE | FALSE |
| 35616027 | Acute deep vein thrombosis of right iliac vein                                        | SNOMED | FALSE | FALSE |
| 35615034 | Acute deep vein thrombosis of right lower limb following procedure                    | SNOMED | FALSE | FALSE |
| 761415   | Acute deep vein thrombosis of right upper limb following coronary artery bypass graft | SNOMED | FALSE | FALSE |
| 35615030 | Acute deep vein thrombosis of right upper limb following procedure                    | SNOMED | FALSE | FALSE |
| 44782746 | Acute deep venous thrombosis                                                          | SNOMED | FALSE | FALSE |
| 44782751 | Acute deep venous thrombosis of axillary vein                                         | SNOMED | FALSE | FALSE |
| 762008   | Acute deep venous thrombosis of bilateral axillary veins                              | SNOMED | FALSE | FALSE |
| 760875   | Acute deep venous thrombosis of bilateral calves                                      | SNOMED | FALSE | FALSE |
| 765155   | Acute deep venous thrombosis of bilateral ileofemoral veins                           | SNOMED | FALSE | FALSE |
| 762017   | Acute deep venous thrombosis of bilateral internal jugular veins                      | SNOMED | FALSE | FALSE |
| 762417   | Acute deep venous thrombosis of bilateral legs                                        | SNOMED | FALSE | FALSE |
| 762020   | Acute deep venous thrombosis of bilateral popliteal veins                             | SNOMED | FALSE | FALSE |
| 765546   | Acute deep venous thrombosis of bilateral tibial veins                                | SNOMED | FALSE | FALSE |
| 762004   | Acute deep venous thrombosis of both upper extremities                                | SNOMED | FALSE | FALSE |
| 44782742 | Acute deep venous thrombosis of calf                                                  | SNOMED | FALSE | FALSE |
| 44782747 | Acute deep venous thrombosis of femoral vein                                          | SNOMED | FALSE | FALSE |
| 762015   | Acute deep venous thrombosis of ileofemoral vein of left leg                          | SNOMED | FALSE | FALSE |
| 765541   | Acute deep venous thrombosis of ileofemoral vein of right lower extremity             | SNOMED | FALSE | FALSE |
| 44782748 | Acute deep venous thrombosis of iliofemoral vein                                      | SNOMED | FALSE | FALSE |
| 44782752 | Acute deep venous thrombosis of internal jugular vein                                 | SNOMED | FALSE | FALSE |
| 762009   | Acute deep venous thrombosis of left axillary vein                                    | SNOMED | FALSE | FALSE |
| 760876   | Acute deep venous thrombosis of left calf                                             | SNOMED | FALSE | FALSE |
| 765540   | Acute deep venous thrombosis of left femoral vein                                     | SNOMED | FALSE | FALSE |
| 765922   | Acute deep venous thrombosis of left internal jugular vein                            | SNOMED | FALSE | FALSE |
| 762418   | Acute deep venous thrombosis of left lower extremity                                  | SNOMED | FALSE | FALSE |

|          |                                                                                    |        |       |       |
|----------|------------------------------------------------------------------------------------|--------|-------|-------|
| 765537   | Acute deep venous thrombosis of left upper extremity                               | SNOMED | FALSE | FALSE |
| 44782767 | Acute deep venous thrombosis of lower extremity as complication of procedure       | SNOMED | FALSE | FALSE |
| 46270071 | Acute deep venous thrombosis of lower limb due to coronary artery bypass grafting  | SNOMED | FALSE | FALSE |
| 762022   | Acute deep venous thrombosis of popliteal vein of right leg                        | SNOMED | FALSE | FALSE |
| 44782743 | Acute deep venous thrombosis of popliteal vein                                     | SNOMED | FALSE | FALSE |
| 762021   | Acute deep venous thrombosis of popliteal vein of left leg                         | SNOMED | FALSE | FALSE |
| 762010   | Acute deep venous thrombosis of right axillary vein                                | SNOMED | FALSE | FALSE |
| 760877   | Acute deep venous thrombosis of right calf                                         | SNOMED | FALSE | FALSE |
| 762013   | Acute deep venous thrombosis of right femoral vein                                 | SNOMED | FALSE | FALSE |
| 762018   | Acute deep venous thrombosis of right internal jugular vein                        | SNOMED | FALSE | FALSE |
| 762419   | Acute deep venous thrombosis of right lower extremity                              | SNOMED | FALSE | FALSE |
| 762005   | Acute deep venous thrombosis of right upper extremity                              | SNOMED | FALSE | FALSE |
| 44782745 | Acute deep venous thrombosis of thigh                                              | SNOMED | FALSE | FALSE |
| 44782744 | Acute deep venous thrombosis of tibial vein                                        | SNOMED | FALSE | FALSE |
| 762026   | Acute deep venous thrombosis of tibial vein of left leg                            | SNOMED | FALSE | FALSE |
| 765156   | Acute deep venous thrombosis of tibial vein of right leg                           | SNOMED | FALSE | FALSE |
| 44782421 | Acute deep venous thrombosis of upper extremity                                    | SNOMED | FALSE | FALSE |
| 764016   | Acute deep venous thrombosis of upper extremity after coronary artery bypass graft | SNOMED | FALSE | FALSE |
| 44782766 | Acute deep venous thrombosis of upper extremity as complication of procedure       | SNOMED | FALSE | FALSE |
| 762048   | Acute thrombosis of left subclavian vein                                           | SNOMED | FALSE | FALSE |
| 45757410 | Acute thrombosis of mesenteric vein                                                | SNOMED | FALSE | FALSE |
| 762049   | Acute thrombosis of right subclavian vein                                          | SNOMED | FALSE | FALSE |
| 36712892 | Acute thrombosis of splenic vein                                                   | SNOMED | FALSE | FALSE |
| 44782762 | Acute thrombosis of subclavian vein                                                | SNOMED | FALSE | FALSE |
| 37109253 | Bilateral acute deep vein thrombosis of femoral veins                              | SNOMED | FALSE | FALSE |
| 40478951 | Bilateral deep vein thrombosis of lower extremities                                | SNOMED | FALSE | FALSE |
| 4046884  | Deep vein thrombosis of leg related to air travel                                  | SNOMED | FALSE | FALSE |
| 4133004  | Deep venous thrombosis                                                             | SNOMED | FALSE | FALSE |
| 4181315  | Deep venous thrombosis associated with coronary artery bypass graft                | SNOMED | FALSE | FALSE |
| 45773536 | Deep venous thrombosis of femoropopliteal vein                                     | SNOMED | FALSE | FALSE |

|          |                                                             |        |       |       |
|----------|-------------------------------------------------------------|--------|-------|-------|
| 763942   | Deep venous thrombosis of left lower extremity              | SNOMED | FALSE | FALSE |
| 761980   | Deep venous thrombosis of left upper extremity              | SNOMED | FALSE | FALSE |
| 443537   | Deep venous thrombosis of lower extremity                   | SNOMED | FALSE | FALSE |
| 4133975  | Deep venous thrombosis of pelvic vein                       | SNOMED | FALSE | FALSE |
| 40480555 | Deep venous thrombosis of peroneal vein                     | SNOMED | FALSE | FALSE |
| 4322565  | Deep venous thrombosis of profunda femoris vein             | SNOMED | FALSE | FALSE |
| 763941   | Deep venous thrombosis of right lower extremity             | SNOMED | FALSE | FALSE |
| 761928   | Deep venous thrombosis of right upper extremity             | SNOMED | FALSE | FALSE |
| 4207899  | Deep venous thrombosis of tibial vein                       | SNOMED | FALSE | FALSE |
| 4028057  | Deep venous thrombosis of upper extremity                   | SNOMED | FALSE | FALSE |
| 193512   | Embolism and thrombosis of the renal vein                   | SNOMED | FALSE | FALSE |
| 435565   | Embolism and thrombosis of the vena cava                    | SNOMED | FALSE | FALSE |
| 4119760  | Iliofemoral deep vein thrombosis                            | SNOMED | FALSE | FALSE |
| 4124856  | Inferior mesenteric vein thrombosis                         | SNOMED | FALSE | FALSE |
| 4281689  | Phlegmasia alba dolens                                      | SNOMED | FALSE | FALSE |
| 4284538  | Phlegmasia cerulea dolens                                   | SNOMED | FALSE | FALSE |
| 4309333  | Postoperative deep vein thrombosis                          | SNOMED | FALSE | FALSE |
| 46285905 | Provoked deep vein thrombosis                               | SNOMED | FALSE | FALSE |
| 4033521  | Splenic vein thrombosis                                     | SNOMED | FALSE | FALSE |
| 4055089  | Superior mesenteric vein thrombosis                         | SNOMED | FALSE | FALSE |
| 42538533 | Thrombosis of iliac vein                                    | SNOMED | FALSE | FALSE |
| 44811347 | Thrombosis of internal jugular vein                         | SNOMED | FALSE | FALSE |
| 765049   | Thrombosis of left peroneal vein                            | SNOMED | FALSE | FALSE |
| 4317289  | Thrombosis of mesenteric vein                               | SNOMED | FALSE | FALSE |
| 4203836  | Thrombosis of subclavian vein                               | SNOMED | FALSE | FALSE |
| 4175649  | Thrombosis of the popliteal vein                            | SNOMED | FALSE | FALSE |
| 4153353  | Traumatic thrombosis of axillary vein                       | SNOMED | FALSE | FALSE |
| 46285904 | Unprovoked deep vein thrombosis                             | SNOMED | FALSE | FALSE |
| 4221821  | Thrombophlebitis of deep veins of lower extremity           | SNOMED | FALSE | FALSE |
| 46271900 | Recurrent deep vein thrombosis                              | SNOMED | FALSE | FALSE |
| 4189004  | Deep vein thrombosis of leg related to intravenous drug use | SNOMED | FALSE | FALSE |

### Splanchnic Vein Thrombosis

| Concept ID | Concept name                        | Vocabulary | Is excluded? | Include descendants? |
|------------|-------------------------------------|------------|--------------|----------------------|
| 4033521    | Splenic vein thrombosis             | SNOMED     | FALSE        | FALSE                |
| 196715     | Budd-Chiari syndrome                | SNOMED     | FALSE        | FALSE                |
| 199837     | Portal vein thrombosis              | SNOMED     | FALSE        | FALSE                |
| 4317289    | Thrombosis of mesenteric vein       | SNOMED     | FALSE        | FALSE                |
| 4092406    | Portal thrombophlebitis             | SNOMED     | FALSE        | FALSE                |
| 36712892   | Acute thrombosis of splenic vein    | SNOMED     | FALSE        | FALSE                |
| 4173167    | Mesenteric embolus                  | SNOMED     | FALSE        | FALSE                |
| 4144032    | Mesenteric thrombus and/or embolus  | SNOMED     | FALSE        | FALSE                |
| 45757410   | Acute thrombosis of mesenteric vein | SNOMED     | FALSE        | FALSE                |

|          |                                       |        |       |       |
|----------|---------------------------------------|--------|-------|-------|
| 45757409 | Chronic thrombosis of mesenteric vein | SNOMED | FALSE | FALSE |
| 4318407  | Thrombophlebitis of mesenteric vein   | SNOMED | FALSE | FALSE |
| 4124856  | Inferior mesenteric vein thrombosis   | SNOMED | FALSE | FALSE |
| 4055089  | Superior mesenteric vein thrombosis   | SNOMED | FALSE | FALSE |

### ***Pulmonary embolism***

| Concept ID | Concept name                                                        | Vocabulary | Is excluded? | Include descendants? |
|------------|---------------------------------------------------------------------|------------|--------------|----------------------|
| 4120091    | Acute massive pulmonary embolism                                    | SNOMED     | FALSE        | FALSE                |
| 45768439   | Acute pulmonary embolism                                            | SNOMED     | FALSE        | FALSE                |
| 45768888   | Acute pulmonary thromboembolism                                     | SNOMED     | FALSE        | FALSE                |
| 4309039    | Hemorrhagic pulmonary infarction                                    | SNOMED     | FALSE        | FALSE                |
| 762808     | Infarction of lung due to embolus                                   | SNOMED     | FALSE        | FALSE                |
| 40480461   | Infarction of lung due to iatrogenic pulmonary embolism             | SNOMED     | FALSE        | FALSE                |
| 4108681    | Postoperative pulmonary embolus                                     | SNOMED     | FALSE        | FALSE                |
| 4091708    | Pulmonary air embolism                                              | SNOMED     | FALSE        | FALSE                |
| 440417     | Pulmonary embolism                                                  | SNOMED     | FALSE        | FALSE                |
| 37109911   | Pulmonary embolism due to and following acute myocardial infarction | SNOMED     | FALSE        | FALSE                |
| 37016922   | Pulmonary embolism on long-term anticoagulation therapy             | SNOMED     | FALSE        | FALSE                |
| 43530605   | Pulmonary embolism with pulmonary infarction                        | SNOMED     | FALSE        | FALSE                |
| 4119608    | Pulmonary fat embolism                                              | SNOMED     | FALSE        | FALSE                |
| 254662     | Pulmonary infarction                                                | SNOMED     | FALSE        | FALSE                |
| 4253796    | Pulmonary microemboli                                               | SNOMED     | FALSE        | FALSE                |
| 45766471   | Pulmonary oil microembolism                                         | SNOMED     | FALSE        | FALSE                |
| 4121618    | Pulmonary thromboembolism                                           | SNOMED     | FALSE        | FALSE                |
| 4119610    | Pulmonary tumor embolism                                            | SNOMED     | FALSE        | FALSE                |
| 4119607    | Subacute massive pulmonary embolism                                 | SNOMED     | FALSE        | FALSE                |
| 4119609    | Subacute pulmonary fat embolism                                     | SNOMED     | FALSE        | FALSE                |
| 4236271    | Recurrent pulmonary embolism                                        | SNOMED     | FALSE        | FALSE                |

### ***Thrombocytopenia***

- Platelet measurement

| Concept ID | Concept name                                                 | Vocabulary | Is excluded? | Include descendants? |
|------------|--------------------------------------------------------------|------------|--------------|----------------------|
| 3007461    | Platelets [#\volume] in Blood                                | LOINC      | FALSE        | TRUE                 |
| 3031586    | Platelets [#\volume] in Blood by Estimate                    | LOINC      | FALSE        | TRUE                 |
| 3024929    | Platelets [#\volume] in Blood by Automated count             | LOINC      | FALSE        | TRUE                 |
| 3039827    | Platelets [#\volume] in Body fluid by Automated count        | LOINC      | FALSE        | TRUE                 |
| 3024386    | Platelet mean volume [Entitic volume] in Blood by Rees-Ecker | LOINC      | FALSE        | TRUE                 |
| 4267147    | Platelet count                                               | SNOMED     | FALSE        | TRUE                 |
| 37393863   | Platelet count                                               | SNOMED     | FALSE        | TRUE                 |

- Thrombocytopenia diagnosis

| Concept ID | Concept name                                                                                | Vocabulary | Is excluded? | Include descendants? |
|------------|---------------------------------------------------------------------------------------------|------------|--------------|----------------------|
| 37397537   | Beta thalassemia X-linked thrombocytopenia syndrome                                         | SNOMED     | FALSE        | FALSE                |
| 432870     | Thrombocytopenic disorder                                                                   | SNOMED     | FALSE        | FALSE                |
| 46272950   | Thrombocytopathy, asplenia and miosis                                                       | SNOMED     | FALSE        | FALSE                |
| 44782445   | Thrombocytopenia due to alcohol                                                             | SNOMED     | FALSE        | FALSE                |
| 42536958   | Pancytopenia caused by medication                                                           | SNOMED     | FALSE        | FALSE                |
| 40321716   | Secondary thrombocytopenia                                                                  | SNOMED     | FALSE        | FALSE                |
| 37312165   | Atypical hemolytic uremic syndrome                                                          | SNOMED     | FALSE        | FALSE                |
| 37209558   | Pancytopenia caused by immunosuppressant                                                    | SNOMED     | FALSE        | FALSE                |
| 37204551   | Hereditary isolated aplastic anemia                                                         | SNOMED     | FALSE        | FALSE                |
| 37204548   | Hereditary thrombocytopenia with normal platelets                                           | SNOMED     | FALSE        | FALSE                |
| 37204520   | Bleeding diathesis due to thromboxane synthesis deficiency                                  | SNOMED     | FALSE        | FALSE                |
| 37204478   | Pancytopenia due to IKZF1 mutations                                                         | SNOMED     | FALSE        | FALSE                |
| 37117164   | Revesz syndrome                                                                             | SNOMED     | FALSE        | FALSE                |
| 37116398   | Thyrocerebrorenal syndrome                                                                  | SNOMED     | FALSE        | FALSE                |
| 37110394   | Isolated thrombocytopenia                                                                   | SNOMED     | FALSE        | FALSE                |
| 37019055   | Aplastic anemia co-occurrent with human immunodeficiency virus infection                    | SNOMED     | FALSE        | FALSE                |
| 37018663   | Thrombocytopenia co-occurrent and due to alcoholism                                         | SNOMED     | FALSE        | FALSE                |
| 37017607   | Antibody mediated acquired pure red cell aplasia caused by erythropoiesis stimulating agent | SNOMED     | FALSE        | FALSE                |
| 37017165   | GATA binding protein 1 related thrombocytopenia with dyserythropoiesis                      | SNOMED     | FALSE        | FALSE                |
| 37016797   | MYH9 related disease                                                                        | SNOMED     | FALSE        | FALSE                |
| 37016151   | Aplastic anemia caused by antineoplastic agent                                              | SNOMED     | FALSE        | FALSE                |
| 36717326   | DK phocomelia syndrome                                                                      | SNOMED     | FALSE        | FALSE                |
| 36716406   | Severe fever with thrombocytopenia syndrome virus                                           | SNOMED     | FALSE        | FALSE                |
| 36716047   | Radioulnar synostosis with amegakaryocytic thrombocytopenia syndrome                        | SNOMED     | FALSE        | FALSE                |
| 36715586   | Refractory thrombocytopenia                                                                 | SNOMED     | FALSE        | FALSE                |
| 36715053   | Autosomal dominant macrothrombocytopenia                                                    | SNOMED     | FALSE        | FALSE                |
| 36713970   | WT limb blood syndrome                                                                      | SNOMED     | FALSE        | FALSE                |
| 36713443   | MYH9 macrothrombocytopenia syndrome                                                         | SNOMED     | FALSE        | FALSE                |
| 36713112   | Pancytopenia due to antineoplastic chemotherapy                                             | SNOMED     | FALSE        | FALSE                |
| 36674972   | Macrothrombocytopenia with mitral valve insufficiency                                       | SNOMED     | FALSE        | FALSE                |
| 36674474   | Pancytopenia with developmental delay syndrome                                              | SNOMED     | FALSE        | FALSE                |
| 35625536   | Ataxia pancytopenia syndrome                                                                | SNOMED     | FALSE        | FALSE                |
| 35623407   | Adult pure red cell aplasia                                                                 | SNOMED     | FALSE        | FALSE                |
| 4345236    | Parvoviral aplastic crisis                                                                  | SNOMED     | FALSE        | FALSE                |
| 4338386    | Thrombocytopenia due to non-immune destruction                                              | SNOMED     | FALSE        | FALSE                |
| 4316372    | HELLP syndrome                                                                              | SNOMED     | FALSE        | FALSE                |



|         |                                                               |        |       |       |
|---------|---------------------------------------------------------------|--------|-------|-------|
| 4314802 | Kasabach-Merritt syndrome                                     | SNOMED | FALSE | FALSE |
| 4311682 | Radial aplasia-thrombocytopenia syndrome                      | SNOMED | FALSE | FALSE |
| 4305588 | Doan-Wright syndrome                                          | SNOMED | FALSE | FALSE |
| 4301602 | Thrombotic thrombocytopenic purpura                           | SNOMED | FALSE | FALSE |
| 4301128 | Thrombocytopenia due to diminished platelet production        | SNOMED | FALSE | FALSE |
| 4300464 | Wiskott-Aldrich autosomal dominant variant syndrome           | SNOMED | FALSE | FALSE |
| 4299560 | Thrombocytopenic purpura due to defective platelet production | SNOMED | FALSE | FALSE |
| 4298690 | Immunologic aplastic anemia                                   | SNOMED | FALSE | FALSE |
| 4292531 | Thrombocytopenic purpura due to platelet consumption          | SNOMED | FALSE | FALSE |
| 4292425 | Sex-linked thrombocytopenia                                   | SNOMED | FALSE | FALSE |
| 4272928 | Thrombocytopenia due to hypersplenism                         | SNOMED | FALSE | FALSE |
| 4264464 | Mediterranean macrothrombocytopenia                           | SNOMED | FALSE | FALSE |
| 4258261 | Drug induced thrombotic thrombocytopenic purpura              | SNOMED | FALSE | FALSE |
| 4247776 | Posttransfusion purpura                                       | SNOMED | FALSE | FALSE |
| 4239484 | Acquired pancytopenia                                         | SNOMED | FALSE | FALSE |
| 4235220 | Hereditary thrombocytopenic disorder                          | SNOMED | FALSE | FALSE |
| 4234973 | Chronic acquired pure red cell aplasia                        | SNOMED | FALSE | FALSE |
| 4233407 | Megakaryocytic aplasia                                        | SNOMED | FALSE | FALSE |
| 4230266 | Autoimmune thrombotic thrombocytopenic purpura                | SNOMED | FALSE | FALSE |
| 4226905 | Thrombocytopenia associated with AIDS                         | SNOMED | FALSE | FALSE |
| 4225810 | Aplastic anemia associated with AIDS                          | SNOMED | FALSE | FALSE |
| 4219476 | Thrombocytopenia due to defective platelet production         | SNOMED | FALSE | FALSE |
| 4218171 | Uremic thrombocytopenia                                       | SNOMED | FALSE | FALSE |
| 4214947 | Thrombocytopenic purpura associated with metabolic disorder   | SNOMED | FALSE | FALSE |
| 4211348 | Aplastic anemia associated with pancreatitis                  | SNOMED | FALSE | FALSE |
| 4204900 | Acquired thrombotic thrombocytopenic purpura                  | SNOMED | FALSE | FALSE |
| 4197574 | Dilutional thrombocytopenia                                   | SNOMED | FALSE | FALSE |
| 4188208 | Estren-Dameshek anemia                                        | SNOMED | FALSE | FALSE |
| 4186108 | Aplastic anemia associated with metabolic alteration          | SNOMED | FALSE | FALSE |
| 4185078 | Bernard Soulier syndrome                                      | SNOMED | FALSE | FALSE |
| 4184758 | Acquired aplastic anemia                                      | SNOMED | FALSE | FALSE |
| 4184200 | Secondary aplastic anemia                                     | SNOMED | FALSE | FALSE |
| 4177177 | Cellular immunologic aplastic anemia                          | SNOMED | FALSE | FALSE |
| 4173278 | Thrombocytopenia due to blood loss                            | SNOMED | FALSE | FALSE |
| 4172008 | Cyclic thrombocytopenia                                       | SNOMED | FALSE | FALSE |
| 4166754 | Perinatal thrombocytopenia                                    | SNOMED | FALSE | FALSE |
| 4159966 | Upshaw-Schulman syndrome                                      | SNOMED | FALSE | FALSE |
| 4159749 | Idiopathic maternal thrombocytopenia                          | SNOMED | FALSE | FALSE |
| 4159736 | Radiation thrombocytopenia                                    | SNOMED | FALSE | FALSE |
| 4156233 | Thrombocytopenia due to sequestration                         | SNOMED | FALSE | FALSE |
| 4148471 | Fanconi's anemia                                              | SNOMED | FALSE | FALSE |
| 4147049 | Thrombocytopenia due to extracorporeal circulation            | SNOMED | FALSE | FALSE |

|         |                                                             |        |       |       |
|---------|-------------------------------------------------------------|--------|-------|-------|
| 4146088 | Aplastic anemia due to drugs                                | SNOMED | FALSE | FALSE |
| 4146086 | Constitutional aplastic anemia with malformation            | SNOMED | FALSE | FALSE |
| 4145458 | Thrombocytopenia due to hypothermia                         | SNOMED | FALSE | FALSE |
| 4140545 | Post infectious thrombocytopenic purpura                    | SNOMED | FALSE | FALSE |
| 4139555 | Thrombocytopenia due to massive blood transfusion           | SNOMED | FALSE | FALSE |
| 4137430 | Idiopathic thrombocytopenic purpura                         | SNOMED | FALSE | FALSE |
| 4133984 | Alloimmune thrombocytopenia                                 | SNOMED | FALSE | FALSE |
| 4133983 | Secondary autoimmune thrombocytopenia                       | SNOMED | FALSE | FALSE |
| 4133981 | Benign gestational thrombocytopenia                         | SNOMED | FALSE | FALSE |
| 4125496 | Pure red cell aplasia, acquired                             | SNOMED | FALSE | FALSE |
| 4125494 | Pancytopenia with pancreatitis                              | SNOMED | FALSE | FALSE |
| 4123076 | Montreal platelet syndrome                                  | SNOMED | FALSE | FALSE |
| 4123075 | May-Hegglin anomaly                                         | SNOMED | FALSE | FALSE |
| 4123074 | Megakaryocytic thrombocytopenia                             | SNOMED | FALSE | FALSE |
| 4121265 | Mediterranean thrombocytopenia                              | SNOMED | FALSE | FALSE |
| 4121264 | Epstein syndrome                                            | SNOMED | FALSE | FALSE |
| 4120620 | Amegakaryocytic thrombocytopenia                            | SNOMED | FALSE | FALSE |
| 4119134 | Thrombocytopenic purpura                                    | SNOMED | FALSE | FALSE |
| 4103532 | Immune thrombocytopenia                                     | SNOMED | FALSE | FALSE |
| 4102469 | Acute idiopathic thrombocytopenic purpura                   | SNOMED | FALSE | FALSE |
| 4101603 | Thrombocytopenia due to extracorporeal circulation of blood | SNOMED | FALSE | FALSE |
| 4101583 | Aplastic anemia due to infection                            | SNOMED | FALSE | FALSE |
| 4101582 | Aplastic anemia due to chronic disease                      | SNOMED | FALSE | FALSE |
| 4100998 | Aplastic anemia due to toxic cause                          | SNOMED | FALSE | FALSE |
| 4098148 | Thrombocytopenia due to drugs                               | SNOMED | FALSE | FALSE |
| 4098145 | Idiopathic aplastic anemia                                  | SNOMED | FALSE | FALSE |
| 4098028 | Transient acquired pure red cell aplasia                    | SNOMED | FALSE | FALSE |
| 4098027 | Aplastic anemia due to radiation                            | SNOMED | FALSE | FALSE |
| 4082738 | Autoimmune pancytopenia                                     | SNOMED | FALSE | FALSE |
| 4077348 | Pancytopenia-dysmelia                                       | SNOMED | FALSE | FALSE |
| 4031699 | Humoral immunologic aplastic anemia                         | SNOMED | FALSE | FALSE |
| 4028065 | Autoimmune thrombocytopenia                                 | SNOMED | FALSE | FALSE |
| 4027374 | Alloimmune platelet transfusion refractoriness              | SNOMED | FALSE | FALSE |
| 4009307 | Heparin-induced thrombocytopenia with thrombosis            | SNOMED | FALSE | FALSE |
| 4000065 | Drug-induced immune thrombocytopenia                        | SNOMED | FALSE | FALSE |
| 441264  | Primary thrombocytopenia                                    | SNOMED | FALSE | FALSE |
| 440982  | Wiskott-Aldrich syndrome                                    | SNOMED | FALSE | FALSE |
| 440372  | Acquired thrombocytopenia                                   | SNOMED | FALSE | FALSE |
| 436956  | Evans syndrome                                              | SNOMED | FALSE | FALSE |
| 433749  | Heparin-induced thrombocytopenia                            | SNOMED | FALSE | FALSE |
| 432881  | Pancytopenia                                                | SNOMED | FALSE | FALSE |
| 318397  | Chronic idiopathic thrombocytopenic purpura                 | SNOMED | FALSE | FALSE |
| 140681  | Constitutional aplastic anemia                              | SNOMED | FALSE | FALSE |
| 138723  | Acquired red cell aplasia                                   | SNOMED | FALSE | FALSE |
| 137829  | Aplastic anemia                                             | SNOMED | FALSE | FALSE |

- Thrombocytopenic purpura

| Concept ID | Concept name                                                  | Vocabulary | Is excluded? | Include descendants? |
|------------|---------------------------------------------------------------|------------|--------------|----------------------|
| 4119134    | Thrombocytopenic purpura                                      | SNOMED     | FALSE        | FALSE                |
| 4301602    | Thrombotic thrombocytopenic purpura                           | SNOMED     | FALSE        | FALSE                |
| 4299560    | Thrombocytopenic purpura due to defective platelet production | SNOMED     | FALSE        | FALSE                |
| 4292531    | Thrombocytopenic purpura due to platelet consumption          | SNOMED     | FALSE        | FALSE                |
| 4258261    | Drug induced thrombotic thrombocytopenic purpura              | SNOMED     | FALSE        | FALSE                |
| 4247776    | Posttransfusion purpura                                       | SNOMED     | FALSE        | FALSE                |
| 4230266    | Autoimmune thrombotic thrombocytopenic purpura                | SNOMED     | FALSE        | FALSE                |
| 4214947    | Thrombocytopenic purpura associated with metabolic disorder   | SNOMED     | FALSE        | FALSE                |
| 4204900    | Acquired thrombotic thrombocytopenic purpura                  | SNOMED     | FALSE        | FALSE                |
| 4159966    | Upshaw-Schulman syndrome                                      | SNOMED     | FALSE        | FALSE                |
| 4140545    | Post infectious thrombocytopenic purpura                      | SNOMED     | FALSE        | FALSE                |
| 4137430    | Idiopathic thrombocytopenic purpura                           | SNOMED     | FALSE        | FALSE                |
| 4102469    | Acute idiopathic thrombocytopenic purpura                     | SNOMED     | FALSE        | FALSE                |
| 318397     | Chronic idiopathic thrombocytopenic purpura                   | SNOMED     | FALSE        | FALSE                |
| 313800     | Thrombotic microangiopathy                                    | SNOMED     | FALSE        | FALSE                |

- Immune thrombocytopenia

| Concept ID | Concept name                                     | Vocabulary | Is excluded? | Include descendants? |
|------------|--------------------------------------------------|------------|--------------|----------------------|
| 4103532    | Immune thrombocytopenia                          | SNOMED     | FALSE        | FALSE                |
| 4137430    | Idiopathic thrombocytopenic purpura              | SNOMED     | FALSE        | FALSE                |
| 4133984    | Alloimmune thrombocytopenia                      | SNOMED     | FALSE        | FALSE                |
| 4133983    | Secondary autoimmune thrombocytopenia            | SNOMED     | FALSE        | FALSE                |
| 4102469    | Acute idiopathic thrombocytopenic purpura        | SNOMED     | FALSE        | FALSE                |
| 4028065    | Autoimmune thrombocytopenia                      | SNOMED     | FALSE        | FALSE                |
| 4027374    | Alloimmune platelet transfusion refractoriness   | SNOMED     | FALSE        | FALSE                |
| 4009307    | Heparin-induced thrombocytopenia with thrombosis | SNOMED     | FALSE        | FALSE                |
| 4000065    | Drug-induced immune thrombocytopenia             | SNOMED     | FALSE        | FALSE                |
| 436956     | Evans syndrome                                   | SNOMED     | FALSE        | FALSE                |
| 433749     | Heparin-induced thrombocytopenia                 | SNOMED     | FALSE        | FALSE                |
| 318397     | Chronic idiopathic thrombocytopenic purpura      | SNOMED     | FALSE        | FALSE                |

### ***Ischemic stroke***

| Concept ID | Concept name                                                        | Vocabulary | Is excluded? | Include descendants? |
|------------|---------------------------------------------------------------------|------------|--------------|----------------------|
| 4045735    | Anterior cerebral circulation infarction                            | SNOMED     | FALSE        | FALSE                |
| 4031045    | Anterior choroidal artery syndrome                                  | SNOMED     | FALSE        | FALSE                |
| 761110     | Bilateral cerebral infarction due to precerebral arterial occlusion | SNOMED     | FALSE        | FALSE                |

|          |                                                                        |        |       |       |
|----------|------------------------------------------------------------------------|--------|-------|-------|
| 4110189  | Cerebral infarct due to thrombosis of precerebral arteries             | SNOMED | FALSE | FALSE |
| 443454   | Cerebral infarction                                                    | SNOMED | FALSE | FALSE |
| 762951   | Cerebral infarction due to anterior cerebral artery occlusion          | SNOMED | FALSE | FALSE |
| 765515   | Cerebral infarction due to basilar artery stenosis                     | SNOMED | FALSE | FALSE |
| 43530683 | Cerebral infarction due to carotid artery occlusion                    | SNOMED | FALSE | FALSE |
| 762933   | Cerebral infarction due to cerebral artery occlusion                   | SNOMED | FALSE | FALSE |
| 762937   | Cerebral infarction due to cerebral venous thrombosis                  | SNOMED | FALSE | FALSE |
| 4111714  | Cerebral infarction due to cerebral venous thrombosis, non-pyogenic    | SNOMED | FALSE | FALSE |
| 4108356  | Cerebral infarction due to embolism of cerebral arteries               | SNOMED | FALSE | FALSE |
| 45772786 | Cerebral infarction due to embolism of middle cerebral artery          | SNOMED | FALSE | FALSE |
| 4110190  | Cerebral infarction due to embolism of precerebral arteries            | SNOMED | FALSE | FALSE |
| 762935   | Cerebral infarction due to internal carotid artery occlusion           | SNOMED | FALSE | FALSE |
| 763015   | Cerebral infarction due to middle cerebral artery occlusion            | SNOMED | FALSE | FALSE |
| 46273649 | Cerebral infarction due to occlusion of basilar artery                 | SNOMED | FALSE | FALSE |
| 35610084 | Cerebral infarction due to occlusion of cerebral artery                | SNOMED | FALSE | FALSE |
| 46270031 | Cerebral infarction due to occlusion of precerebral artery             | SNOMED | FALSE | FALSE |
| 762934   | Cerebral infarction due to posterior cerebral artery occlusion         | SNOMED | FALSE | FALSE |
| 43531607 | Cerebral infarction due to stenosis of carotid artery                  | SNOMED | FALSE | FALSE |
| 35610085 | Cerebral infarction due to stenosis of cerebral artery                 | SNOMED | FALSE | FALSE |
| 46270381 | Cerebral infarction due to stenosis of precerebral artery              | SNOMED | FALSE | FALSE |
| 4110192  | Cerebral infarction due to thrombosis of cerebral arteries             | SNOMED | FALSE | FALSE |
| 45767658 | Cerebral infarction due to thrombosis of middle cerebral artery        | SNOMED | FALSE | FALSE |
| 44782773 | Cerebral infarction due to vertebral artery occlusion                  | SNOMED | FALSE | FALSE |
| 46270380 | Cerebral infarction due to vertebral artery stenosis                   | SNOMED | FALSE | FALSE |
| 37110678 | Cerebral ischemic stroke due to occlusion of extracranial large artery | SNOMED | FALSE | FALSE |
| 37110679 | Cerebral ischemic stroke due to stenosis of extracranial large artery  | SNOMED | FALSE | FALSE |
| 4043731  | Infarction - precerebral                                               | SNOMED | FALSE | FALSE |
| 4131383  | Infarction of basal ganglia                                            | SNOMED | FALSE | FALSE |
| 4046237  | Infarction of optic radiation                                          | SNOMED | FALSE | FALSE |
| 4119140  | Infarction of visual cortex                                            | SNOMED | FALSE | FALSE |
| 4141405  | Left sided cerebral infarction                                         | SNOMED | FALSE | FALSE |

|          |                                                                                        |        |       |       |
|----------|----------------------------------------------------------------------------------------|--------|-------|-------|
| 37116473 | Multifocal cerebral infarction due to and following procedure on cardiovascular system | SNOMED | FALSE | FALSE |
| 4077086  | Occipital cerebral infarction                                                          | SNOMED | FALSE | FALSE |
| 4046359  | Partial anterior cerebral circulation infarction                                       | SNOMED | FALSE | FALSE |
| 4319146  | Pituitary infarction                                                                   | SNOMED | FALSE | FALSE |
| 4146185  | Right sided cerebral infarction                                                        | SNOMED | FALSE | FALSE |
| 36717605 | Silent cerebral infarct                                                                | SNOMED | FALSE | FALSE |
| 4142739  | Thalamic infarction                                                                    | SNOMED | FALSE | FALSE |
| 4046358  | Total anterior cerebral circulation infarction                                         | SNOMED | FALSE | FALSE |
| 372924   | Cerebral artery occlusion                                                              | SNOMED | FALSE | FALSE |

### ***Myocardial infarction***

| Concept ID | Concept name                                                                                        | Vocabulary | Is excluded? | Include descendants? |
|------------|-----------------------------------------------------------------------------------------------------|------------|--------------|----------------------|
| 4119457    | Acute Q wave infarction - anterolateral                                                             | SNOMED     | FALSE        | FALSE                |
| 4119943    | Acute Q wave infarction - anteroseptal                                                              | SNOMED     | FALSE        | FALSE                |
| 4121464    | Acute Q wave infarction - inferior                                                                  | SNOMED     | FALSE        | FALSE                |
| 4121465    | Acute Q wave infarction - inferolateral                                                             | SNOMED     | FALSE        | FALSE                |
| 4124684    | Acute Q wave infarction - lateral                                                                   | SNOMED     | FALSE        | FALSE                |
| 4119948    | Acute Q wave infarction - widespread                                                                | SNOMED     | FALSE        | FALSE                |
| 4126801    | Acute Q wave myocardial infarction                                                                  | SNOMED     | FALSE        | FALSE                |
| 4296653    | Acute ST segment elevation myocardial infarction                                                    | SNOMED     | FALSE        | FALSE                |
| 46270162   | Acute ST segment elevation myocardial infarction due to left coronary artery occlusion              | SNOMED     | FALSE        | FALSE                |
| 761737     | Acute ST segment elevation myocardial infarction due to occlusion of circumflex coronary artery     | SNOMED     | FALSE        | FALSE                |
| 46270163   | Acute ST segment elevation myocardial infarction due to right coronary artery occlusion             | SNOMED     | FALSE        | FALSE                |
| 43020460   | Acute ST segment elevation myocardial infarction involving left anterior descending coronary artery | SNOMED     | FALSE        | FALSE                |
| 45766076   | Acute ST segment elevation myocardial infarction of anterior wall involving right ventricle         | SNOMED     | FALSE        | FALSE                |
| 761736     | Acute ST segment elevation myocardial infarction of anteroapical wall                               | SNOMED     | FALSE        | FALSE                |
| 46270159   | Acute ST segment elevation myocardial infarction of anterolateral wall                              | SNOMED     | FALSE        | FALSE                |
| 46270160   | Acute ST segment elevation myocardial infarction of anteroseptal wall                               | SNOMED     | FALSE        | FALSE                |
| 45766116   | Acute ST segment elevation myocardial infarction of inferior wall                                   | SNOMED     | FALSE        | FALSE                |
| 45766151   | Acute ST segment elevation myocardial infarction of inferior wall involving right ventricle         | SNOMED     | FALSE        | FALSE                |
| 35611570   | Acute ST segment elevation myocardial infarction of inferolateral wall                              | SNOMED     | FALSE        | FALSE                |
| 35611571   | Acute ST segment elevation myocardial infarction of inferoposterior wall                            | SNOMED     | FALSE        | FALSE                |
| 46274044   | Acute ST segment elevation myocardial infarction of lateral wall                                    | SNOMED     | FALSE        | FALSE                |

|          |                                                                         |        |       |       |
|----------|-------------------------------------------------------------------------|--------|-------|-------|
| 46270161 | Acute ST segment elevation myocardial infarction of posterior wall      | SNOMED | FALSE | FALSE |
| 46273495 | Acute ST segment elevation myocardial infarction of posterobasal wall   | SNOMED | FALSE | FALSE |
| 46270158 | Acute ST segment elevation myocardial infarction of posterolateral wall | SNOMED | FALSE | FALSE |
| 46270164 | Acute ST segment elevation myocardial infarction of septum              | SNOMED | FALSE | FALSE |
| 45766075 | Acute anterior ST segment elevation myocardial infarction               | SNOMED | FALSE | FALSE |
| 4178129  | Acute anteroapical myocardial infarction                                | SNOMED | FALSE | FALSE |
| 4267568  | Acute anteroseptal myocardial infarction                                | SNOMED | FALSE | FALSE |
| 312327   | Acute myocardial infarction                                             | SNOMED | FALSE | FALSE |
| 44782769 | Acute myocardial infarction due to left coronary artery occlusion       | SNOMED | FALSE | FALSE |
| 44782712 | Acute myocardial infarction due to right coronary artery occlusion      | SNOMED | FALSE | FALSE |
| 45766115 | Acute myocardial infarction during procedure                            | SNOMED | FALSE | FALSE |
| 434376   | Acute myocardial infarction of anterior wall                            | SNOMED | FALSE | FALSE |
| 45766150 | Acute myocardial infarction of anterior wall involving right ventricle  | SNOMED | FALSE | FALSE |
| 438438   | Acute myocardial infarction of anterolateral wall                       | SNOMED | FALSE | FALSE |
| 4243372  | Acute myocardial infarction of apical-lateral wall                      | SNOMED | FALSE | FALSE |
| 4108669  | Acute myocardial infarction of atrium                                   | SNOMED | FALSE | FALSE |
| 4151046  | Acute myocardial infarction of basal-lateral wall                       | SNOMED | FALSE | FALSE |
| 4275436  | Acute myocardial infarction of high lateral wall                        | SNOMED | FALSE | FALSE |
| 438170   | Acute myocardial infarction of inferior wall                            | SNOMED | FALSE | FALSE |
| 45771322 | Acute myocardial infarction of inferior wall involving right ventricle  | SNOMED | FALSE | FALSE |
| 438447   | Acute myocardial infarction of inferolateral wall                       | SNOMED | FALSE | FALSE |
| 441579   | Acute myocardial infarction of inferoposterior wall                     | SNOMED | FALSE | FALSE |
| 436706   | Acute myocardial infarction of lateral wall                             | SNOMED | FALSE | FALSE |
| 4324413  | Acute myocardial infarction of posterobasal wall                        | SNOMED | FALSE | FALSE |
| 4051874  | Acute myocardial infarction of posterolateral wall                      | SNOMED | FALSE | FALSE |
| 4303359  | Acute myocardial infarction of septum                                   | SNOMED | FALSE | FALSE |
| 4147223  | Acute myocardial infarction with rupture of ventricle                   | SNOMED | FALSE | FALSE |
| 4145721  | Acute non-Q wave infarction                                             | SNOMED | FALSE | FALSE |
| 4119944  | Acute non-Q wave infarction - anterolateral                             | SNOMED | FALSE | FALSE |
| 4119456  | Acute non-Q wave infarction - anteroseptal                              | SNOMED | FALSE | FALSE |
| 4119945  | Acute non-Q wave infarction - inferior                                  | SNOMED | FALSE | FALSE |

|          |                                                                                                               |        |       |       |
|----------|---------------------------------------------------------------------------------------------------------------|--------|-------|-------|
| 4119946  | Acute non-Q wave infarction - inferolateral                                                                   | SNOMED | FALSE | FALSE |
| 4121466  | Acute non-Q wave infarction - lateral                                                                         | SNOMED | FALSE | FALSE |
| 4124685  | Acute non-Q wave infarction - widespread                                                                      | SNOMED | FALSE | FALSE |
| 4270024  | Acute non-ST segment elevation myocardial infarction                                                          | SNOMED | FALSE | FALSE |
| 35610091 | Acute nontransmural myocardial infarction                                                                     | SNOMED | FALSE | FALSE |
| 319039   | Acute posterior myocardial infarction                                                                         | SNOMED | FALSE | FALSE |
| 444406   | Acute subendocardial infarction                                                                               | SNOMED | FALSE | FALSE |
| 35610093 | Acute transmural myocardial infarction                                                                        | SNOMED | FALSE | FALSE |
| 4119947  | Acute widespread myocardial infarction                                                                        | SNOMED | FALSE | FALSE |
| 37109912 | Arrhythmia due to and following acute myocardial infarction                                                   | SNOMED | FALSE | FALSE |
| 438172   | Atrial septal defect due to and following acute myocardial infarction                                         | SNOMED | FALSE | FALSE |
| 4124687  | Cardiac rupture due to and following acute myocardial infarction                                              | SNOMED | FALSE | FALSE |
| 4215259  | First myocardial infarction                                                                                   | SNOMED | FALSE | FALSE |
| 4108678  | Hemopericardium due to and following acute myocardial infarction                                              | SNOMED | FALSE | FALSE |
| 4173632  | Microinfarct of heart                                                                                         | SNOMED | FALSE | FALSE |
| 45771327 | Mitral valve regurgitation due to acute myocardial infarction with papillary muscle and chordal rupture       | SNOMED | FALSE | FALSE |
| 45766214 | Mitral valve regurgitation due to acute myocardial infarction without papillary muscle and chordal rupture    | SNOMED | FALSE | FALSE |
| 45766212 | Mitral valve regurgitation due to and following acute myocardial infarction                                   | SNOMED | FALSE | FALSE |
| 4323202  | Mixed myocardial ischemia and infarction                                                                      | SNOMED | FALSE | FALSE |
| 4329847  | Myocardial infarction                                                                                         | SNOMED | FALSE | FALSE |
| 37309626 | Myocardial infarction due to demand ischemia                                                                  | SNOMED | FALSE | FALSE |
| 4170094  | Myocardial infarction in recovery phase                                                                       | SNOMED | FALSE | FALSE |
| 4200113  | Non-Q wave myocardial infarction                                                                              | SNOMED | FALSE | FALSE |
| 4030582  | Postoperative myocardial infarction                                                                           | SNOMED | FALSE | FALSE |
| 35610087 | Postoperative nontransmural myocardial infarction                                                             | SNOMED | FALSE | FALSE |
| 4206867  | Postoperative subendocardial myocardial infarction                                                            | SNOMED | FALSE | FALSE |
| 35610089 | Postoperative transmural myocardial infarction                                                                | SNOMED | FALSE | FALSE |
| 4207921  | Postoperative transmural myocardial infarction of anterior wall                                               | SNOMED | FALSE | FALSE |
| 4209541  | Postoperative transmural myocardial infarction of inferior wall                                               | SNOMED | FALSE | FALSE |
| 37109911 | Pulmonary embolism due to and following acute myocardial infarction                                           | SNOMED | FALSE | FALSE |
| 4108679  | Rupture of cardiac wall without hemopericardium as current complication following acute myocardial infarction | SNOMED | FALSE | FALSE |
| 4108219  | Rupture of chordae tendinae due to and following acute myocardial infarction                                  | SNOMED | FALSE | FALSE |
| 4124686  | Silent myocardial infarction                                                                                  | SNOMED | FALSE | FALSE |

|          |                                                                                                           |        |       |       |
|----------|-----------------------------------------------------------------------------------------------------------|--------|-------|-------|
| 765132   | Subendocardial myocardial infarction                                                                      | SNOMED | FALSE | FALSE |
| 45766114 | Subsequent ST segment elevation myocardial infarction                                                     | SNOMED | FALSE | FALSE |
| 45766113 | Subsequent ST segment elevation myocardial infarction of anterior wall                                    | SNOMED | FALSE | FALSE |
| 45773170 | Subsequent ST segment elevation myocardial infarction of inferior wall                                    | SNOMED | FALSE | FALSE |
| 4108217  | Subsequent myocardial infarction                                                                          | SNOMED | FALSE | FALSE |
| 4108677  | Subsequent myocardial infarction of anterior wall                                                         | SNOMED | FALSE | FALSE |
| 4108218  | Subsequent myocardial infarction of inferior wall                                                         | SNOMED | FALSE | FALSE |
| 45766241 | Subsequent non-ST segment elevation myocardial infarction                                                 | SNOMED | FALSE | FALSE |
| 4108680  | Thrombosis of atrium, auricular appendage, and ventricle due to and following acute myocardial infarction | SNOMED | FALSE | FALSE |
| 439693   | True posterior myocardial infarction                                                                      | SNOMED | FALSE | FALSE |
| 37109910 | Ventricular aneurysm due to and following acute myocardial infarction                                     | SNOMED | FALSE | FALSE |

### **Other arterial thromboembolism**

- Intestinal infarction

| Concept ID | Concept name                                  | Vocabulary | Is excluded? | Include descendants? |
|------------|-----------------------------------------------|------------|--------------|----------------------|
| 4195665    | Gastrointestinal tract vascular insufficiency | SNOMED     | FALSE        | FALSE                |
| 4148299    | Ischemic colitis                              | SNOMED     | FALSE        | FALSE                |
| 4173167    | Mesenteric embolus                            | SNOMED     | FALSE        | FALSE                |
| 4317289    | Thrombosis of mesenteric vein                 | SNOMED     | FALSE        | FALSE                |
| 4319280    | Acute bowel infarction                        | SNOMED     | FALSE        | FALSE                |
| 4144032    | Mesenteric thrombus and/or embolus            | SNOMED     | FALSE        | FALSE                |
| 45757410   | Acute thrombosis of mesenteric vein           | SNOMED     | FALSE        | FALSE                |
| 45757409   | Chronic thrombosis of mesenteric vein         | SNOMED     | FALSE        | FALSE                |
| 44811741   | Acute ischaemia of large intestine            | SNOMED     | FALSE        | FALSE                |
| 44811740   | Acute ischaemia of small intestine            | SNOMED     | FALSE        | FALSE                |
| 37117790   | Insufficiency of mesenteric artery            | SNOMED     | FALSE        | FALSE                |
| 37016198   | Epiploic appendagitis                         | SNOMED     | FALSE        | FALSE                |
| 35622081   | Nongangrenous ischemic colitis                | SNOMED     | FALSE        | FALSE                |
| 35622080   | Gangrenous ischemic colitis                   | SNOMED     | FALSE        | FALSE                |
| 4345926    | Abdominal angina                              | SNOMED     | FALSE        | FALSE                |
| 4342767    | Transient ischemic colitis                    | SNOMED     | FALSE        | FALSE                |
| 4341648    | Hemorrhagic infarction of intestine           | SNOMED     | FALSE        | FALSE                |
| 4341646    | Occlusive mesenteric ischemia                 | SNOMED     | FALSE        | FALSE                |
| 4340939    | Non-occlusive mesenteric ischemia             | SNOMED     | FALSE        | FALSE                |
| 4340378    | Transmural infarction of intestine            | SNOMED     | FALSE        | FALSE                |
| 4340375    | Focal segmental ischemia of small intestine   | SNOMED     | FALSE        | FALSE                |
| 4318537    | Large bowel gangrene                          | SNOMED     | FALSE        | FALSE                |
| 4318407    | Thrombophlebitis of mesenteric vein           | SNOMED     | FALSE        | FALSE                |
| 4240850    | Acute ischemic enterocolitis                  | SNOMED     | FALSE        | FALSE                |
| 4239942    | Embolus mesenteric infarction                 | SNOMED     | FALSE        | FALSE                |
| 4237654    | Ischemic enterocolitis                        | SNOMED     | FALSE        | FALSE                |
| 4215949    | Nonocclusive intestinal infarction            | SNOMED     | FALSE        | FALSE                |
| 4214720    | Thrombotic mesenteric infarction              | SNOMED     | FALSE        | FALSE                |
| 4192856    | Acute ischemic colitis                        | SNOMED     | FALSE        | FALSE                |



|         |                                                       |        |       |       |
|---------|-------------------------------------------------------|--------|-------|-------|
| 4188336 | Chronic ischemic enterocolitis                        | SNOMED | FALSE | FALSE |
| 4174014 | Inferior mesenteric artery embolus                    | SNOMED | FALSE | FALSE |
| 4149013 | Mesenteric infarction                                 | SNOMED | FALSE | FALSE |
| 4148257 | Chronic gastrointestinal tract vascular insufficiency | SNOMED | FALSE | FALSE |
| 4148256 | Acute GIT vascular insufficiency                      | SNOMED | FALSE | FALSE |
| 4124856 | Inferior mesenteric vein thrombosis                   | SNOMED | FALSE | FALSE |
| 4055089 | Superior mesenteric vein thrombosis                   | SNOMED | FALSE | FALSE |
| 4055025 | Superior mesenteric artery embolus                    | SNOMED | FALSE | FALSE |
| 4045408 | Ischemic stricture of intestine                       | SNOMED | FALSE | FALSE |
| 201894  | Acute vascular insufficiency of intestine             | SNOMED | FALSE | FALSE |
| 192673  | Vascular insufficiency of intestine                   | SNOMED | FALSE | FALSE |
